# Supplementary material for: Regioselective addition/annulation of ferrocenyl thioamides with 1,3-diynes via a sulfur-transfer rearrangement to construct extended π-conjugated ferrocenes with luminescent properties
Source: Royal Society of Chemistry journal article supplement (doi:10.1039/d0sc04597g), 2020-01-01

## Supplementary Information

### **Regioselective addition/annulation of ferrocenyl thioamides with 1,3-diynes *via* a sulfur-transfer rearrangement to construct extended $\pi$ -conjugated ferrocenes with luminescent property**

Lipeng Yan, Jingbo Lan,\* Hu Cheng, Yihang Li, Mangang Zhang, Di Wu, and Jingsong You\*

*Key Laboratory of Green Chemistry and Technology of Ministry of Education, College of Chemistry, Sichuan University, 29 Wangjiang Road, Chengdu 610064, People's Republic of China*

## Table of Contents

|                                                                                                                             |     |
|-----------------------------------------------------------------------------------------------------------------------------|-----|
| I. General Remarks .....                                                                                                    | S3  |
| II. Synthesis of 1,3-diynes <b>2</b> .....                                                                                  | S4  |
| III. Rh catalyzed <i>ortho</i> -C–H activation/addition of ferrocenyl amide <b>1</b> with 1,3-diyne <b>2a</b> .....         | S6  |
| IV. Optimization of regioselective addition/annulation of ferrocenyl thioamide <b>5</b> with 1,3-diyne <b>2a</b> .....      | S7  |
| V. General procedure for regioselective addition/annulation of ferrocenyl thioamide <b>5</b> with 1,3-diynes <b>2</b> ..... | S9  |
| VI. Gram-scale synthesis of <b>6a</b> .....                                                                                 | S9  |
| VII. Mechanistic studies .....                                                                                              | S10 |
| VIII. Synthesis of extended $\pi$ -conjugated ferrocenes <b>7</b> .....                                                     | S16 |
| IX. Calculated molecular conformations, photophysical and electrochemical properties.....                                   | S17 |
| X. Preparation and characterization of the described compounds .....                                                        | S19 |
| XI. References.....                                                                                                         | S36 |
| XII. Copies of $^1\text{H}$ , $^{13}\text{C}$ and $^1\text{H}$ - $^1\text{H}$ NOESY NMR spectra .....                       | S37 |

## I. General Remarks

Unless otherwise noted, all reagents were obtained from commercial suppliers and used without further purification. Ferrocenyl amide **1**,<sup>1</sup> ferrocenyl thioamide **5**,<sup>1</sup> methyl ferrocene carboxylate **8**,<sup>2</sup> and 2,5-diphenylthiophene **9**<sup>3</sup> and 1-(deca-1,3-diyne-1-yl)-4-methoxybenzene **2n**<sup>4</sup> were prepared according to literature procedures. 1,3-Diynes **2a-2e** and **2h-2j** were prepared by homocouplings of the corresponding terminal alkynes.<sup>5</sup> 1,3-Diynes **2f**, **2g**, **2k-2m** and **2o-2r** were prepared *via* the Sonogashira coupling reaction of the corresponding brominated (hetero)arenes with trimethylsilylacetylene, desilication, and homocoupling of the resulting terminal alkynes.<sup>5</sup>

NMR spectra were obtained on an Agilent 400-MR DD2 spectrometer. <sup>1</sup>H NMR (400 MHz) chemical shifts were measured relative to CDCl<sub>3</sub> or DMSO-*d*<sub>6</sub> as the internal reference (CDCl<sub>3</sub>:  $\delta$  = 7.26 ppm; DMSO-*d*<sub>6</sub>:  $\delta$  = 2.50 ppm). <sup>13</sup>C NMR (100 MHz) chemical shifts were measured relative to CDCl<sub>3</sub> or DMSO-*d*<sub>6</sub> as the internal reference (CDCl<sub>3</sub>:  $\delta$  = 77.16 ppm; DMSO-*d*<sub>6</sub>:  $\delta$  = 39.52 ppm). High-resolution mass spectra (HRMS) were obtained with a Shimadzu LCMS-IT-TOF (ESI) spectrometer. Melting points were determined with XRC-1 with no correction. The absorption and fluorescence spectra were obtained using a HITACHI U-2910 spectrometer and a Horiba Fluorolog-3 fluorescence spectrometer, respectively.

Cyclic voltammetry (CV) measurements were carried out on a CHI660D electrochemical workstation at a scan rate of 50 mV/s in dry acetonitrile containing 0.1 M of *n*-Bu<sub>4</sub>NPF<sub>6</sub> supporting electrolyte under an N<sub>2</sub> atmosphere, using Fc/Fc<sup>+</sup> (0.08 V) as reference. The three-electrode setup consisted of an Ag/Ag<sup>+</sup> (0.01 M of AgNO<sub>3</sub> in acetonitrile) reference electrode, a platinum wire counter electrode, and a platinum plate working electrode.

Spectroelectrochemical experiments were performed in a thin-layer (1 mm) quartz cell under an N<sub>2</sub> atmosphere, employing dry acetonitrile as solvent with *n*-Bu<sub>4</sub>NPF<sub>6</sub> (0.1 M) as supporting electrolyte. The three-electrode setup consisted of a platinum

network working electrode, a platinum wire counter electrode, and an Ag/AgCl reference electrode (0.52 V, vs Fc/Fc<sup>+</sup>).

## II. Synthesis of 1,3-diynes **2**

### 2.1 Synthesis of 1,3-diyne **2s**<sup>5,6</sup>

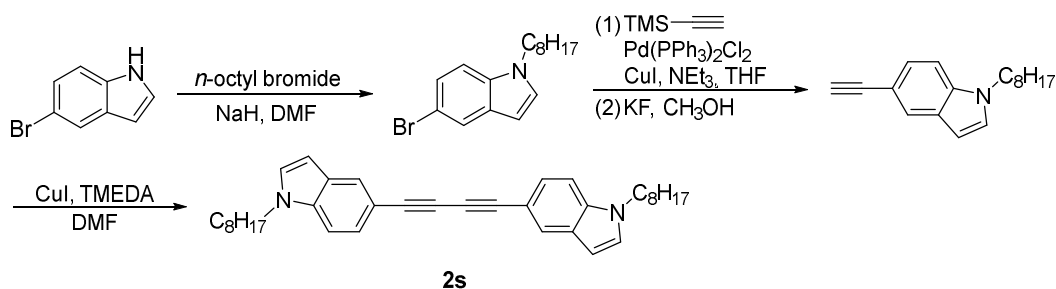

A solution of 5-bromoindole (0.98 g, 5 mmol) in anhydrous DMF (15 mL) was added dropwise over 20 min to a stirred suspension of NaH (60% dispersion in mineral oil, 0.32 g, 8 mmol) in anhydrous DMF (15 mL) in an ice bath. A solution of *n*-octyl bromide (0.9 mL, 5.2 mmol) in anhydrous DMF (15 mL) was slowly added over 5 min. Then, the mixture was warmed to room temperature and stirred overnight. The reaction was quenched with ethanol (10 mL) carefully and poured into ice-water. The resulting mixture was extracted with dichloromethane twice. The combined organic layer was washed with brine, dried with anhydrous Na<sub>2</sub>SO<sub>4</sub>, and concentrated under reduced pressure. The residue was purified by column chromatography on silica gel (petroleum ether/ethyl acetate = 20/1, v/v) to give 5-bromo-1-octyl-1*H*-indole as a yellow oil in 87% yield (1.34 g).

A three-necked flask with a magnetic stir bar was charged with 5-bromo-1-octyl-1*H*-indole (1.23 g, 4 mmol), trimethylsilylacetylene (1.1 mL, 8 mmol), Pd(PPh<sub>3</sub>)<sub>2</sub>Cl<sub>2</sub> (140.4 mg, 5 mol%), CuI (76.2 mg, 10 mol%), triethylamine (3 mL) and THF (9 mL) under an N<sub>2</sub> atmosphere. After stirred at 80 °C for 24 h, the resulting mixture was cooled to room temperature. Then, KF (0.46 g, 8 mmol) was added along with CH<sub>3</sub>OH (10 mL), and the mixture was stirred under air for another 4 h. The mixture was filtered through a celite pad and washed with 20 mL of dichloromethane. Then the filtrate was concentrated under reduced pressure and purified by column

chromatography on silica gel (petroleum ether/ethyl acetate = 20/1, v/v) to provide 5-ethynyl-1-octyl-1*H*-indole as a yellow oil in 79% yield (0.80 g).

CuI (38.1 mg, 10 mol%) and TMEDA (0.3 mL, 2 mmol) was added to the solution of 5-ethynyl-1-octyl-1*H*-indole (0.51 g, 2 mmol) in DMF (5 mL). The resulting mixture was then stirred at room temperature overnight. Then, the mixture was diluted in ethyl acetate (50 mL). The organic layer was washed with saline, dried over MgSO<sub>4</sub>, filtered and the filtrate was concentrated under reduced pressure. The residue was then purified by column chromatography on silica gel (petroleum ether/ethyl acetate = 20/1, v/v) to give 1,4-bis(1-octyl-1*H*-indol-5-yl)buta-1,3-diyne (**2s**) as a yellow oil in a yield of 81% (0.41 g).

## 2.2 Synthesis of 1,3-diyne **2t**<sup>5,7</sup>

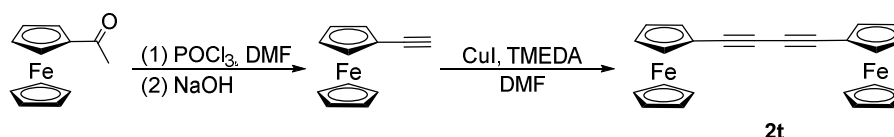

Acetyl ferrocene (1.14 g, 5 mmol) was dissolved in DMF (15 mL) and then phosphorus oxychloride (3 mL) in DMF (10 mL) was added dropwise at 0 °C under N<sub>2</sub>. The reaction mixture was stirred at 0 °C for 15 min and then warmed to room temperature for 2 h. The mixture was poured to 20% of NaOAc solution (100 mL) under N<sub>2</sub> and stirred for 1.5 h. The mixture was extracted with dichloromethane and washed with saline. The organic phase was dried over MgSO<sub>4</sub>, filtered and the filtrate was concentrated under reduced pressure to give the crude product. To the solution of the crude product in 1,4-dioxane (8 mL) under N<sub>2</sub>, 0.5 M of NaOH solution (5 mL) was added. Then the reaction mixture was refluxed for 5 min and poured into ice-water (50 mL). The mixture was subsequently neutralized by 1 N of HCl solution and extracted with ethyl acetate. The organic layer was washed with saline, dried over MgSO<sub>4</sub>, filtered and the filtrate was concentrated under reduced pressure. The crude product was purified by column chromatography on silica gel (petroleum ether/ethyl acetate = 20/1, v/v) to give ethynyl ferrocene in a yield of 61% (0.64 g).

CuI (38.1 mg, 10 mol%) and TMEDA (0.3 mL, 2 mmol) was added to the solution of ethynyl ferrocene (0.42 g, 2 mmol) in DMF (5 mL). The resulting mixture was then stirred at room temperature overnight. Then, the mixture was diluted in ethyl acetate (50 mL). The organic layer was washed with saline, dried over MgSO<sub>4</sub>, filtered and the filtrate was concentrated under reduced pressure. The residue was then purified by column chromatography on silica gel (petroleum ether/ethyl acetate = 20/1, v/v) to give 1,4-diferrocenylbuta-1,3-diyne (**2t**) as a red solid in a yield of 67% (0.28 g).

### 2.3 Synthesis of 1,3-diyne **2u** and **2v**<sup>5</sup>

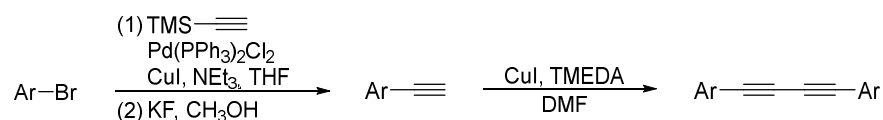

A three-necked flask with a magnetic stir bar was charged with the brominated arenes (5 mmol), trimethylsilylacetylene (10 mmol), Pd(PPh<sub>3</sub>)<sub>2</sub>Cl<sub>2</sub> (5 mol%), CuI (10 mol%), triethylamine (3 mL) and THF (9 mL) under an N<sub>2</sub> atmosphere. After refluxed at 80 °C for 24 h, the resulting mixture was cooled to room temperature. Then, KF (10 mmol) was added along with CH<sub>3</sub>OH (10 mL), and the mixture was stirred under air for another 4 h. The mixture was filtered through a celite pad and washed with 20 mL of dichloromethane. Then the filtrate was concentrated under reduced pressure and purified by column chromatography on silica gel to provide the corresponding terminal alkynes.

CuI (10 mol%) and TMEDA (2 mmol) was added to the solution of the acquired terminal alkyne (2 mmol) in DMF (5 mL). The resulting mixture was then stirred at room temperature overnight. Then, the mixture was diluted in ethyl acetate (50 mL). The organic layer was washed with saline, dried over MgSO<sub>4</sub>, filtered and the filtrate was concentrated under reduced pressure. The residue was then purified by column chromatography on silica gel to give the final 1,3-diyne products.

### III. Rh catalyzed *ortho*-C–H activation/addition of ferrocenyl amide **1**

## with 1,3-diyne **2a**

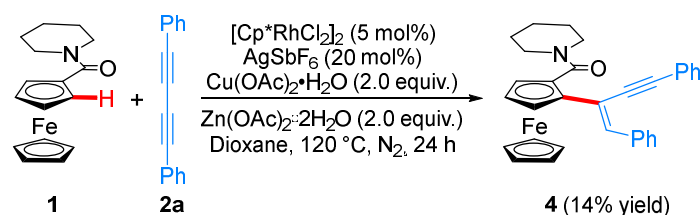

A 25 mL Schlenk sealed tube with a magnetic stir bar was charged with ferrocenyl amides **1** (59.4 mg, 0.2 mmol), 1,4-diphenylbuta-1,3-diyne **2a** (40.5 mg, 0.2 mmol, 1.0 equiv.),  $[\text{Cp}^*\text{RhCl}_2]_2$  (6.2 mg, 5 mol%),  $\text{AgSbF}_6$  (13.7 mg, 20 mol%),  $\text{Cu}(\text{OAc})_2 \cdot \text{H}_2\text{O}$  (79.9 mg, 0.4 mmol, 2.0 equiv.),  $\text{Zn}(\text{OAc})_2 \cdot 2\text{H}_2\text{O}$  (87.8 mg, 0.4 mmol, 2.0 equiv.) and 1,4-dioxane (2 mL) under an  $\text{N}_2$  atmosphere. The resulting mixture was stirred at 120 °C for 24 h and then diluted with 10 mL of dichloromethane. The mixture was filtered through a celite pad and washed with 20 mL of dichloromethane. Then the filtrate was concentrated under reduced pressure and purified by column chromatography on silica gel (petroleum ether/ethyl acetate = 4/1, v/v) to provide compound **4** as a yellow solid in a yield of 14% (14.2 mg).

## IV. Optimization of regioselective addition/annulation of ferrocenyl thioamide **5** with 1,3-diyne **2a**

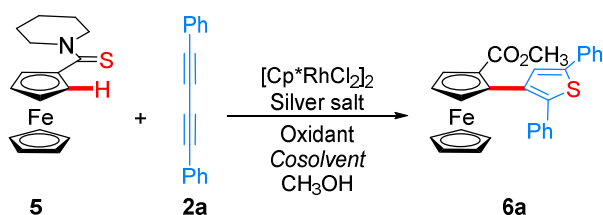

A 25 mL Schlenk sealed tube with a magnetic stir bar was charged with ferrocenyl thioamide **5** (62.6 mg, 0.2 mmol, 2.0 equiv.), 1,4-diphenyl-1,3-butadiyne **2a** (20.2 mg, 0.1 mmol),  $[\text{Rh}]$ ,  $[\text{Ag}]$ , oxidant and solvent under an  $\text{N}_2$  atmosphere. The resulting mixture was stirred at 80 °C for 16-24 h and then diluted with 10 mL of dichloromethane. The mixture was filtered through a celite pad and washed with 20 mL of dichloromethane. Then the filtrate was concentrated under reduced pressure.

The residue was dissolved in CDCl<sub>3</sub> and analyzed by <sup>1</sup>H NMR with CH<sub>2</sub>Br<sub>2</sub> (3.5 μL, 0.05 mmol) as the internal standard. The NMR yields determined by the characteristic proton signal of **6a** at 4.88 ppm relative to the internal standard signal of CH<sub>2</sub>Br<sub>2</sub> at 4.93 ppm. If necessary, the residue would be purified by column chromatography on silica gel (petroleum ether/ethyl acetate = 15/1, v/v) to give the isolated yield of **6a**.

**Table S1. Optimization of regioselective addition/annulation of 1,3-diyne 2a with ferrocenyl thioamide 5.<sup>a</sup>**

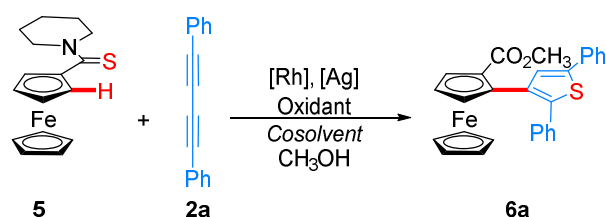

| Entry           | [Rh]                                                        | [Ag]               | Oxidant                                | Solvent                                                | Yield (%) <sup>b</sup> |
|-----------------|-------------------------------------------------------------|--------------------|----------------------------------------|--------------------------------------------------------|------------------------|
| 1               | [Cp*RhCl <sub>2</sub> ] <sub>2</sub>                        | AgSbF <sub>6</sub> | Cu(OAc) <sub>2</sub> ·H <sub>2</sub> O | CH <sub>3</sub> OH                                     | 46 <sup>c</sup>        |
| 2               | [Cp*RhCl <sub>2</sub> ] <sub>2</sub>                        | AgBF <sub>4</sub>  | Cu(OAc) <sub>2</sub> ·H <sub>2</sub> O | CH <sub>3</sub> OH                                     | 49                     |
| 3               | [Cp*RhCl <sub>2</sub> ] <sub>2</sub>                        | AgOTf              | Cu(OAc) <sub>2</sub> ·H <sub>2</sub> O | CH <sub>3</sub> OH                                     | 38                     |
| 4               | [Cp*RhCl <sub>2</sub> ] <sub>2</sub>                        | AgNTf <sub>2</sub> | Cu(OAc) <sub>2</sub> ·H <sub>2</sub> O | CH <sub>3</sub> OH                                     | 55                     |
| 5               | [Cp*RhCl <sub>2</sub> ] <sub>2</sub>                        | AgOTs              | Cu(OAc) <sub>2</sub> ·H <sub>2</sub> O | CH <sub>3</sub> OH                                     | 61                     |
| 6               | [Cp*RhCl <sub>2</sub> ] <sub>2</sub>                        | AgOTs              | Cu(OPiv) <sub>2</sub>                  | CH <sub>3</sub> OH                                     | 37                     |
| 7               | [Cp*RhCl <sub>2</sub> ] <sub>2</sub>                        | AgOTs              | AgOAc                                  | CH <sub>3</sub> OH                                     | trace                  |
| 8               | [Cp*RhCl <sub>2</sub> ] <sub>2</sub>                        | AgOTs              | Oxygen (1 atm)                         | CH <sub>3</sub> OH                                     | N.D.                   |
| 9               | [Cp*RhCl <sub>2</sub> ] <sub>2</sub>                        | AgOTs              | Benzoquinone                           | CH <sub>3</sub> OH                                     | N.D.                   |
| 10 <sup>d</sup> | [Cp*RhCl <sub>2</sub> ] <sub>2</sub>                        | AgOTs              | Cu(OAc) <sub>2</sub> ·H <sub>2</sub> O | CH <sub>3</sub> OH                                     | 79                     |
| 11 <sup>e</sup> | [Cp*RhCl <sub>2</sub> ] <sub>2</sub>                        | AgOTs              | Cu(OAc) <sub>2</sub> ·H <sub>2</sub> O | DCE/CH <sub>3</sub> OH                                 | 65                     |
| 12 <sup>f</sup> | [Cp*RhCl <sub>2</sub> ] <sub>2</sub>                        | AgOTs              | Cu(OAc) <sub>2</sub> ·H <sub>2</sub> O | Cl <sub>3</sub> CCH <sub>2</sub> OH/CH <sub>3</sub> OH | 83 (81 <sup>c</sup> )  |
| 13 <sup>g</sup> | [Cp*RhCl <sub>2</sub> ] <sub>2</sub>                        | AgOTs              | Cu(OAc) <sub>2</sub> ·H <sub>2</sub> O | Cl <sub>3</sub> CCH <sub>2</sub> OH/CH <sub>3</sub> OH | 69                     |
| 14 <sup>h</sup> | [Cp*RhCl <sub>2</sub> ] <sub>2</sub>                        | AgOTs              | Cu(OAc) <sub>2</sub> ·H <sub>2</sub> O | Cl <sub>3</sub> CCH <sub>2</sub> OH/CH <sub>3</sub> OH | 47                     |
| 15 <sup>i</sup> | [Cp*Rh(CH <sub>3</sub> CN) <sub>3</sub> ](OTs) <sub>2</sub> | -                  | Cu(OAc) <sub>2</sub> ·H <sub>2</sub> O | Cl <sub>3</sub> CCH <sub>2</sub> OH/CH <sub>3</sub> OH | 72                     |
| 16 <sup>j</sup> | [Cp*Rh(CH <sub>3</sub> CN) <sub>3</sub> ](OTs) <sub>2</sub> | -                  | Air (1 atm)                            | Cl <sub>3</sub> CCH <sub>2</sub> OH/CH <sub>3</sub> OH | N.D.                   |



<sup>a</sup>Reactions were carried out by using **5** (0.2 mmol), **2a** (0.1 mmol), [Rh] (5 mol%), [Ag] (20 mol%) and oxidant (2.0 equiv.) in CH<sub>3</sub>OH (1 mL) at 80 °C for 24 h under an N<sub>2</sub> atmosphere. <sup>b</sup>NMR yields. <sup>c</sup>Isolated yields. <sup>d</sup>CH<sub>3</sub>OH (2 mL). <sup>e</sup>1,2-Dichloroethane (DCE, 0.5 mL) and CH<sub>3</sub>OH (1.5 mL). <sup>f</sup>Cl<sub>3</sub>CCH<sub>2</sub>OH (0.5 mL) and CH<sub>3</sub>OH (1.5 mL). <sup>g</sup>Cl<sub>3</sub>CCH<sub>2</sub>OH (0.5 mL), CH<sub>3</sub>OH (1.5 mL) and stirred for 16 h. <sup>h</sup>[Cp\**Rh*Cl<sub>2</sub>]<sub>2</sub> (2.5 mol%), AgOTs (10 mol%), Cl<sub>3</sub>CCH<sub>2</sub>OH (0.5 mL) and CH<sub>3</sub>OH (1.5 mL). <sup>i</sup>[Cp\**Rh*(CH<sub>3</sub>CN)<sub>3</sub>](OTs)<sub>2</sub> (10 mol%), Cl<sub>3</sub>CCH<sub>2</sub>OH (0.5 mL) and CH<sub>3</sub>OH (1.5 mL). <sup>j</sup>[Cp\**Rh*(CH<sub>3</sub>CN)<sub>3</sub>](OTs)<sub>2</sub> (10 mol%), Cl<sub>3</sub>CCH<sub>2</sub>OH (0.5 mL) and CH<sub>3</sub>OH (1.5 mL) under air. N.D. = not detected.

## V. General procedure for regioselective addition/annulation of ferrocenyl thioamide **5** with 1,3-diynes **2**

A 25 mL Schlenk sealed tube with a magnetic stir bar was charged with ferrocenyl thioamide **5** (0.2 mmol), 1,3-diyne **2** (0.1 mmol), [Cp\**Rh*Cl<sub>2</sub>]<sub>2</sub> (5 mol%), AgOTs (20 mol%), Cu(OAc)<sub>2</sub>·H<sub>2</sub>O (0.2 mmol), Cl<sub>3</sub>CCH<sub>2</sub>OH (0.5 mL) and CH<sub>3</sub>OH (1.5 mL) under an N<sub>2</sub> atmosphere. The resulting mixture was stirred at 80 °C for 24 h and then diluted with 10 mL of dichloromethane. The mixture was filtered through a celite pad and washed with about 20 mL of dichloromethane. Then the filtrate was concentrated under reduced pressure and purified by column chromatography on silica gel to provide desired products **6**.

## VI. Gram-scale synthesis of **6a**

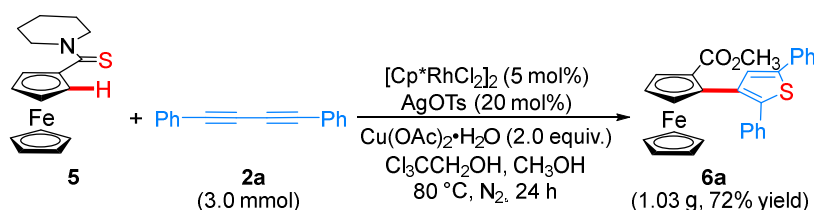

A 100 mL three-necked flask with a magnetic stir bar was charged with ferrocenyl thioamides **5** (1.88 g, 6.0 mmol, 2.0 equiv.), 1,4-diphenylbuta-1,3-diyne **2a** (0.61 g, 3.0 mmol), [Cp\**Rh*Cl<sub>2</sub>]<sub>2</sub> (92.7 mg, 5 mol%), AgOTs (167.4 mg, 20 mol%), Cu(OAc)<sub>2</sub>·H<sub>2</sub>O (1.20 g, 6.0 mmol, 2.0 equiv.), Cl<sub>3</sub>CCH<sub>2</sub>OH (7.5 mL) and CH<sub>3</sub>OH (22.5 mL) under an N<sub>2</sub> atmosphere. The resulting mixture was stirred at 80 °C for 24 h and then diluted with 20 mL of dichloromethane. The mixture was filtered through a celite pad and washed with 30 mL of dichloromethane. Then the filtrate was concentrated under reduced

pressure and purified by column chromatography on silica gel (petroleum ether/ethyl acetate = 15:1, v/v) to provide the desired product **6a** (1.03 g, 72% yield).

## VII. Mechanistic studies

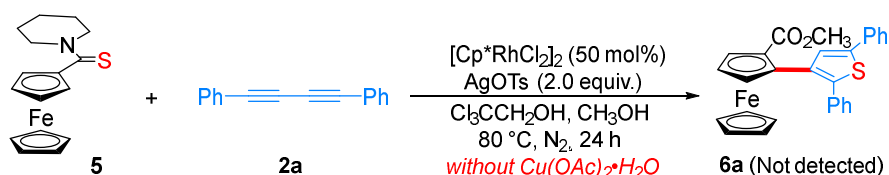

A 25 mL Schlenk sealed tube with a magnetic stir bar was charged with ferrocenyl thioamide **5** (31.3 mg, 0.1 mmol), 1,4-diphenylbuta-1,3-diyne **2a** (20.2 mg, 0.1 mmol),  $[\text{Cp}^*\text{RhCl}_2]_2$  (30.9 mg, 0.05 mmol, 50 mol%), AgOTs (55.8 mg, 0.2 mmol, 2.0 equiv.),  $\text{Cl}_3\text{CCH}_2\text{OH}$  (0.5 mL) and  $\text{CH}_3\text{OH}$  (1.5 mL) under an  $\text{N}_2$  atmosphere. The resulting mixture was stirred at  $80^\circ\text{C}$  for 24 h and then diluted with 10 mL of dichloromethane. The mixture was filtered through a celite pad and washed with 20 mL of dichloromethane. The filtrate was concentrated under reduced pressure, followed by dissolved in  $\text{CDCl}_3$ . The in-situ  $^1\text{H}$  NMR spectrum of the reaction mixture showed that there was no product **6a** obtained.

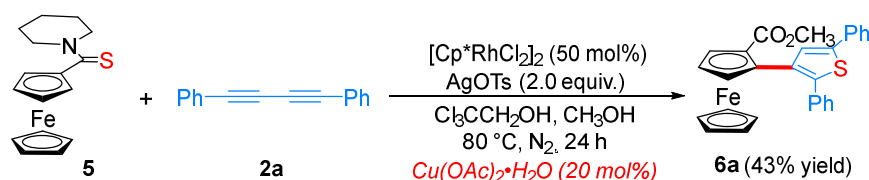

A 25 mL Schlenk sealed tube with a magnetic stir bar was charged with ferrocenyl thioamide **5** (31.3 mg, 0.1 mmol), 1,4-diphenylbuta-1,3-diyne **2a** (20.2 mg, 0.1 mmol),  $[\text{Cp}^*\text{RhCl}_2]_2$  (30.9 mg, 0.05 mmol, 50 mol%), AgOTs (55.8 mg, 0.2 mmol, 2.0 equiv.),  $\text{Cu}(\text{OAc})_2\cdot\text{H}_2\text{O}$  (4.0 mg, 0.02 mmol, 20 mol%),  $\text{Cl}_3\text{CCH}_2\text{OH}$  (0.5 mL) and  $\text{CH}_3\text{OH}$  (1.5 mL) under an  $\text{N}_2$  atmosphere. The resulting mixture was stirred at  $80^\circ\text{C}$  for 24 h and then diluted with 10 mL of dichloromethane. The mixture was filtered through a celite pad and washed with 20 mL of dichloromethane. The filtrate was concentrated under reduced pressure and purified by column chromatography on silica gel (petroleum ether/ethyl acetate = 15:1, v/v), providing compound **6a** with 43% yield (20.6 mg).

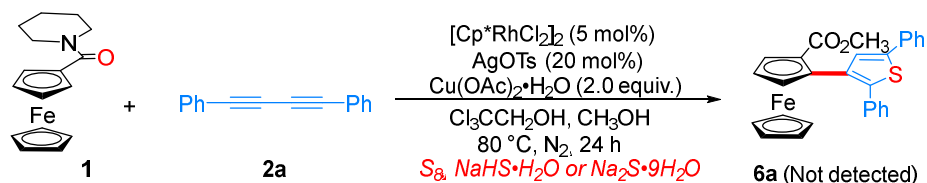

A 25 mL Schlenk sealed tube with a magnetic stir bar was charged with ferrocenyl amide **1** (59.4 mg, 0.2 mmol, 2.0 equiv.), 1,4-diphenylbuta-1,3-diyne **2a** (20.2 mg, 0.1 mmol), the corresponding external sulfur source (0.3 mmol, 3.0 equiv.),  $[\text{Cp}^*\text{RhCl}_2]_2$  (3.1 mg, 5 mol%), AgOTs (5.6 mg, 20 mol%),  $\text{Cu}(\text{OAc})_2 \cdot \text{H}_2\text{O}$  (39.9 mg, 0.2 mmol, 2.0 equiv.),  $\text{Cl}_3\text{CCH}_2\text{OH}$  (0.5 mL) and  $\text{CH}_3\text{OH}$  (1.5 mL) under an  $\text{N}_2$  atmosphere. The resulting mixture was stirred at  $80^\circ\text{C}$  for 24 h and then diluted with 10 mL of dichloromethane. The mixture was filtered through a celite pad and washed with 20 mL of dichloromethane. The filtrate was concentrated under reduced pressure, followed by dissolved in  $\text{CDCl}_3$ . In-situ  $^1\text{H}$  NMR spectra of all the reaction mixtures showed that there was no product **6a** obtained.

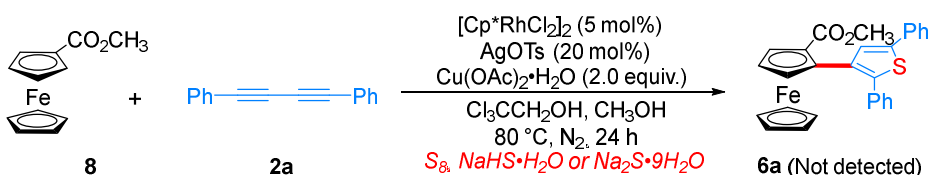

A 25 mL Schlenk sealed tube with a magnetic stir bar was charged with methyl ferrocene carboxylate **8** (48.8 mg, 0.2 mmol, 2.0 equiv.), 1,4-diphenylbuta-1,3-diyne **2a** (20.2 mg, 0.1 mmol), the corresponding external sulfur source (0.3 mmol, 3.0 equiv.),  $[\text{Cp}^*\text{RhCl}_2]_2$  (3.1 mg, 5 mol%), AgOTs (5.6 mg, 20 mol%),  $\text{Cu}(\text{OAc})_2 \cdot \text{H}_2\text{O}$  (39.9 mg, 0.2 mmol, 2.0 equiv.),  $\text{Cl}_3\text{CCH}_2\text{OH}$  (0.5 mL) and  $\text{CH}_3\text{OH}$  (1.5 mL) under an  $\text{N}_2$  atmosphere. The resulting mixture was stirred at  $80^\circ\text{C}$  for 24 h and then diluted with 10 mL of dichloromethane. The mixture was filtered through a celite pad and washed with 20 mL of dichloromethane. The filtrate was concentrated under reduced pressure, followed by dissolved in  $\text{CDCl}_3$ . In-situ  $^1\text{H}$  NMR spectra of all the reaction mixtures showed that there was no product **6a** obtained.

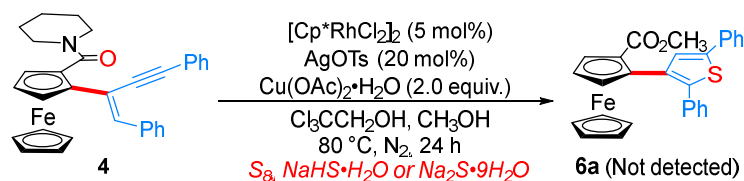

A 25 mL Schlenk sealed tube with a magnetic stir bar was charged with **4** (49.9 mg, 0.1 mmol), the corresponding external sulfur source (0.3 mmol, 3.0 equiv.),  $[\text{Cp}^*\text{RhCl}_2]_2$  (3.1 mg, 5 mol%), AgOTs (5.6 mg, 20 mol%),  $\text{Cu}(\text{OAc})_2 \cdot \text{H}_2\text{O}$  (39.9 mg, 0.2 mmol, 2.0 equiv.),  $\text{Cl}_3\text{CCH}_2\text{OH}$  (0.5 mL) and  $\text{CH}_3\text{OH}$  (1.5 mL) under an  $\text{N}_2$  atmosphere. The resulting mixture was stirred at 80 °C for 24 h and then diluted with 10 mL of dichloromethane. The mixture was filtered through a celite pad and washed with 20 mL of dichloromethane. The filtrate was concentrated under reduced pressure, followed by dissolved in  $\text{CDCl}_3$ . The in-situ  $^1\text{H}$  NMR spectrum of the reaction mixture showed that there was no product **6a** obtained.

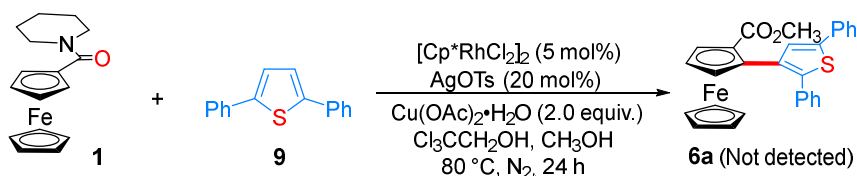

A 25 mL Schlenk sealed tube with a magnetic stir bar was charged with ferrocenyl amide **1** (59.4 mg, 0.2 mmol, 2.0 equiv.), 2,5-diphenylthiophene **9** (23.6 mg, 0.1 mmol),  $[\text{Cp}^*\text{RhCl}_2]_2$  (3.1 mg, 5 mol%), AgOTs (5.6 mg, 20 mol%),  $\text{Cu}(\text{OAc})_2 \cdot \text{H}_2\text{O}$  (39.9 mg, 0.2 mmol, 2.0 equiv.),  $\text{Cl}_3\text{CCH}_2\text{OH}$  (0.5 mL) and  $\text{CH}_3\text{OH}$  (1.5 mL) under an  $\text{N}_2$  atmosphere. The resulting mixture was stirred at 80 °C for 24 h and then diluted with 10 mL of dichloromethane. The mixture was filtered through a celite pad and washed with 20 mL of dichloromethane. The filtrate was concentrated under reduced pressure, followed by dissolved in  $\text{CDCl}_3$ . In-situ  $^1\text{H}$  NMR spectra of all the reaction mixtures showed that there was no product **6a** obtained.

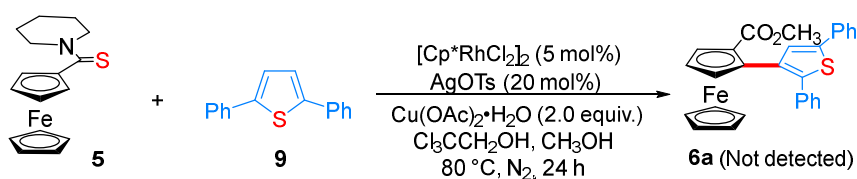

A 25 mL Schlenk sealed tube with a magnetic stir bar was charged with ferrocenyl thioamide **5** (62.6 mg, 0.2 mmol, 2.0 equiv.), 2,5-diphenylthiophene **9** (23.6 mg, 0.1 mmol), [Cp\*RhCl<sub>2</sub>]<sub>2</sub> (3.1 mg, 5 mol%), AgOTs (5.6 mg, 20 mol%), Cu(OAc)<sub>2</sub>·H<sub>2</sub>O (39.9 mg, 0.2 mmol, 2.0 equiv.), Cl<sub>3</sub>CCH<sub>2</sub>OH (0.5 mL) and CH<sub>3</sub>OH (1.5 mL) under an N<sub>2</sub> atmosphere. The resulting mixture was stirred at 80 °C for 24 h and then diluted with 10 mL of dichloromethane. The mixture was filtered through a celite pad and washed with 20 mL of dichloromethane. The filtrate was concentrated under reduced pressure, followed by dissolved in CDCl<sub>3</sub>. In-situ <sup>1</sup>H NMR spectra of all the reaction mixtures showed that there was no product **6a** obtained.

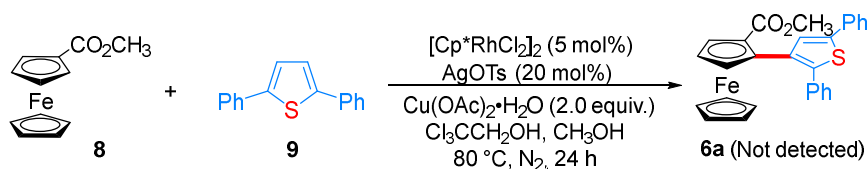

A 25 mL Schlenk sealed tube with a magnetic stir bar was charged with methyl ferrocene carboxylate **8** (48.8 mg, 0.2 mmol, 2.0 equiv.), 2,5-diphenylthiophene **9** (23.6 mg, 0.1 mmol), [Cp\*RhCl<sub>2</sub>]<sub>2</sub> (3.1 mg, 5 mol%), AgOTs (5.6 mg, 20 mol%), Cu(OAc)<sub>2</sub>·H<sub>2</sub>O (39.9 mg, 0.2 mmol, 2.0 equiv.), Cl<sub>3</sub>CCH<sub>2</sub>OH (0.5 mL) and CH<sub>3</sub>OH (1.5 mL) under an N<sub>2</sub> atmosphere. The resulting mixture was stirred at 80 °C for 24 h and then diluted with 10 mL of dichloromethane. The mixture was filtered through a celite pad and washed with 20 mL of dichloromethane. The filtrate was concentrated under reduced pressure, followed by dissolved in CDCl<sub>3</sub>. In-situ <sup>1</sup>H NMR spectra of all the reaction mixtures showed that there was no product **6a** obtained.

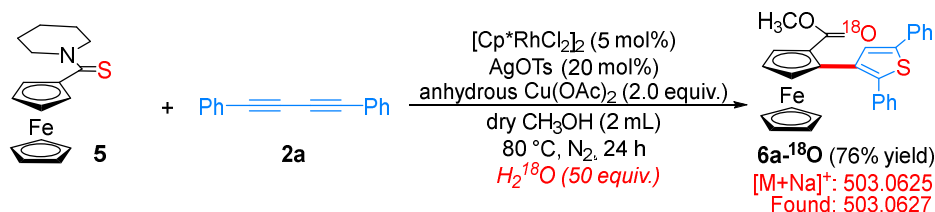

A 25 mL Schlenk sealed tube with a magnetic stir bar was charged with ferrocenyl thioamide **5** (62.6 mg, 0.2 mmol, 2.0 equiv.), 1,4-diphenylbuta-1,3-diyne **2a** (20.2 mg, 0.1 mmol), heavy-oxygen water (H<sub>2</sub><sup>18</sup>O, 90 μL, 5.0 mmol, 50 equiv.), [Cp\*RhCl<sub>2</sub>]<sub>2</sub> (3.1

mg, 5 mol%), AgOTs (5.6 mg, 20 mol%), anhydrous Cu(OAc)<sub>2</sub> (36.3 mg, 0.2 mmol, 2.0 equiv.) and dry CH<sub>3</sub>OH (2 mL) under an N<sub>2</sub> atmosphere. The resulting mixture was stirred at 80 °C for 24 h and then diluted with 10 mL of dichloromethane. The mixture was filtered through a celite pad and washed with 20 mL of dichloromethane. The filtrate was concentrated under reduced pressure and purified by column chromatography on silica gel (petroleum ether/ethyl acetate = 15:1, v/v), providing 36.4 mg of compound **6a-<sup>18</sup>O** in 76% yield. The ESI-HRMS of **6a-<sup>18</sup>O** calculated for C<sub>28</sub>H<sub>22</sub>Fe<sup>16</sup>O<sup>18</sup>OSNa [M+Na]<sup>+</sup> 503.0625, was found 503.0627.

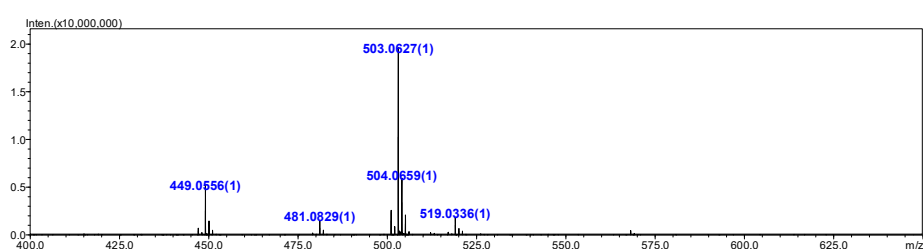

Fig. S1. ESI-HRMS spectrum of **6a-<sup>18</sup>O**.

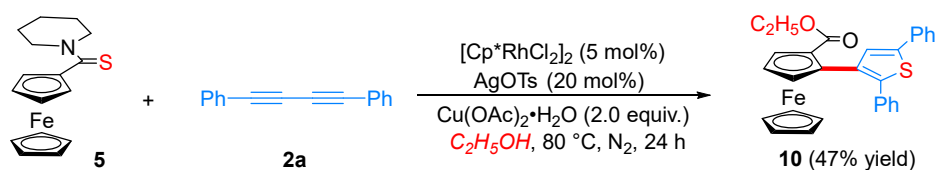

A 25 mL Schlenk sealed tube with a magnetic stir bar was charged with ferrocenyl thioamide **5** (62.6 mg, 0.2 mmol, 2.0 equiv.), 1,4-diphenylbuta-1,3-diyne **2a** (20.2 mg, 0.1 mmol), [Cp\*RhCl<sub>2</sub>]<sub>2</sub> (3.1 mg, 5 mol%), AgOTs (5.6 mg, 20 mol%), Cu(OAc)<sub>2</sub>·H<sub>2</sub>O (39.9 mg, 0.2 mmol, 2.0 equiv.) and CH<sub>3</sub>CH<sub>2</sub>OH (2 mL) under an N<sub>2</sub> atmosphere. The resulting mixture was stirred at 80 °C for 24 h and then diluted with 10 mL of dichloromethane. The mixture was filtered through a celite pad and washed with 20 mL of dichloromethane. The filtrate was concentrated under reduced pressure, and purified by column chromatography on silica gel (petroleum ether/ethyl acetate = 15:1, v/v) to provide compound **10** as a yellow solid in a yield of 47% (23.3 mg).

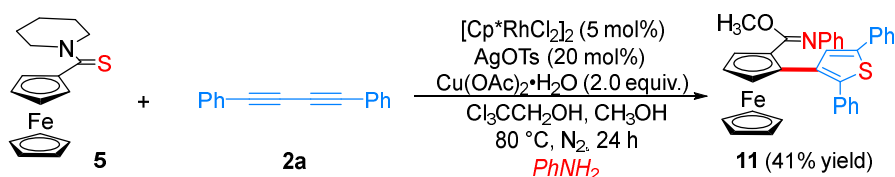

A 25 mL Schlenk sealed tube with a magnetic stir bar was charged with ferrocenyl thioamide **5** (62.6 mg, 0.2 mmol, 2.0 equiv.), 1,4-diphenylbuta-1,3-diyne **2a** (20.2 mg, 0.1 mmol), aniline (27  $\mu$ L, 0.3 mmol, 3.0 equiv.), [Cp\*RhCl<sub>2</sub>]<sub>2</sub> (3.1 mg, 5 mol%), AgOTs (5.6 mg, 20 mol%), Cu(OAc)<sub>2</sub>·H<sub>2</sub>O (39.9 mg, 0.2 mmol, 2.0 equiv.), Cl<sub>3</sub>CCH<sub>2</sub>OH (0.5 mL) and CH<sub>3</sub>OH (1.5 mL) under an N<sub>2</sub> atmosphere. The resulting mixture was stirred at 80 °C for 24 h and then diluted with 10 mL of dichloromethane. The mixture was filtered through a celite pad and washed with 20 mL of dichloromethane. The filtrate was concentrated under reduced pressure and purified by column chromatography on silica gel (petroleum ether/ethyl acetate = 15:1, v/v) to provide compound **11** as a yellow solid in 41% yield (22.7 mg).

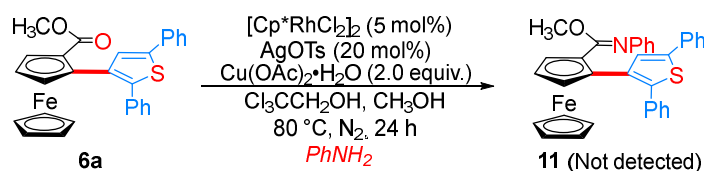

A 25 mL Schlenk sealed tube with a magnetic stir bar was charged with thienylferrocene **6a** (47.8 mg, 0.1 mmol), aniline (27  $\mu$ L, 0.3 mmol, 3.0 equiv.), [Cp\*RhCl<sub>2</sub>]<sub>2</sub> (3.1 mg, 5 mol%), AgOTs (5.6 mg, 20 mol%), Cu(OAc)<sub>2</sub>·H<sub>2</sub>O (39.9 mg, 0.2 mmol, 2.0 equiv.), Cl<sub>3</sub>CCH<sub>2</sub>OH (0.5 mL) and CH<sub>3</sub>OH (1.5 mL) under an N<sub>2</sub> atmosphere. The resulting mixture was stirred at 80 °C for 24 h and then diluted with 10 mL of dichloromethane. The mixture was filtered through a celite pad and washed with 20 mL of dichloromethane. The filtrate was concentrated under reduced pressure, followed by dissolved in CDCl<sub>3</sub>. In-situ <sup>1</sup>H NMR spectra of the reaction mixture showed that there was no product **11** obtained.

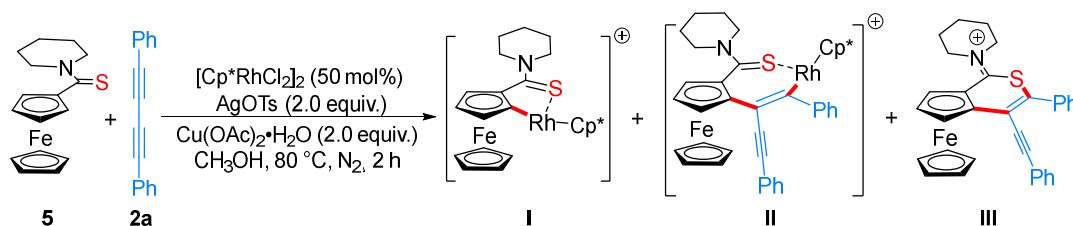

A 25 mL Schlenk sealed tube with a magnetic stir bar was charged with ferrocenyl thioamide **5** (31.3 mg, 0.1 mmol), 1,4-diphenylbuta-1,3-diyne **2a** (20.2 mg, 0.1 mmol),

[Cp\*RhCl<sub>2</sub>]<sub>2</sub> (30.9 mg, 50 mol%), AgOTs (55.8 mg, 2.0 equiv.), Cu(OAc)<sub>2</sub>·H<sub>2</sub>O (39.9 mg, 0.2 mmol, 2.0 equiv.) and CH<sub>3</sub>OH (2 mL) under an N<sub>2</sub> atmosphere. The resulting mixture was stirred at 80 °C for 2 h, and then cooled to room temperature for ESI-HRMS detection.

Intermediate I: calcd for C<sub>26</sub>H<sub>33</sub>FeNRhS [M]<sup>+</sup> 550.0733, found 550.0731;

Intermediate II: calcd for C<sub>42</sub>H<sub>43</sub>FeNRhS [M]<sup>+</sup> 752.1515, found 752.1521;

Intermediate III: calcd for C<sub>32</sub>H<sub>28</sub>FeNS [M]<sup>+</sup> 514.1286, found 514.1289.

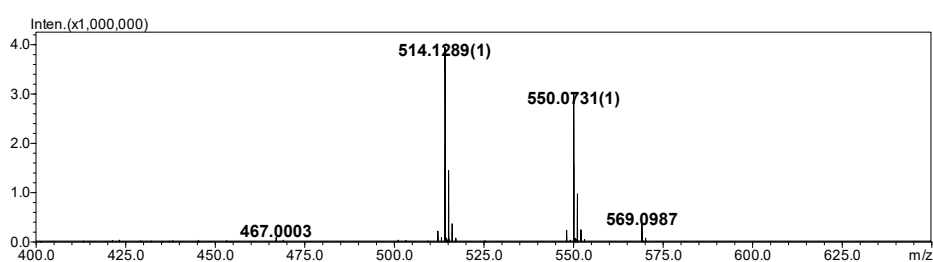

Fig. S2. ESI-HRMS spectrum of intermediates I and III.

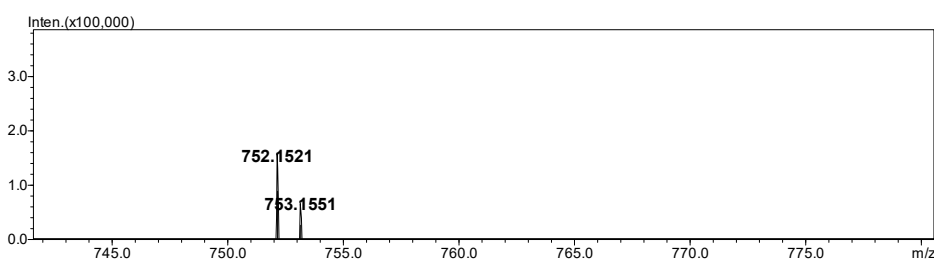

Fig. S3. ESI-HRMS spectrum of intermediate II.

## VIII. Synthesis of extended $\pi$ -conjugated ferrocenes 7

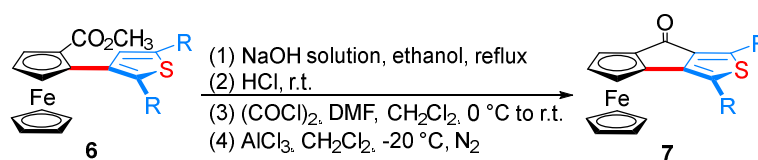

4 M of NaOH solution (15 mL) was added to the solution of thienylferrocene 6 (0.3 mmol) and EtOH (45 mL). Monitored by thin-layer chromatography, the mixture was refluxed until hydrolyzed completely. Then, 2 N of HCl solution was added carefully at room temperature until the mixture was weakly acidic. After evaporated under reduced pressure, the residue was diluted with 150 mL of ethyl acetate and washed



with saline solution (200 mL) three times. The organic layer was dried over  $\text{MgSO}_4$ , filtered, and concentrated under reduced pressure. The residue was re-dissolved in 50 mL of dichloromethane and filtered out the insoluble. Finally, the filtrate was concentrated under reduced pressure to give the hydrolysate.

Then, oxalyl chloride (45  $\mu\text{L}$ , 0.53 mmol) was added to the solution of the hydrolysate in dry dichloromethane (20 mL) at 0 °C under  $\text{N}_2$ , followed by two drops of DMF. The mixture was stirred for 6 h at room temperature and evaporated under reduced pressure. To a mixture of  $\text{AlCl}_3$  (160.0 mg, 1.2 mmol) in dry dichloromethane (20 mL) cooled to -20 °C, the solution of the prepared acyl chloride re-dissolved in dry dichloromethane (20 mL), which had also been cooled to -20 °C, was added *via* a double-ended needle under an  $\text{N}_2$  atmosphere. The resulting mixture was stirred for overnight at -20 °C. Then 2 mL water was poured into the reaction flask at -20 °C, stirring for 5 min. The mixture was diluted with 100 mL of dichloromethane and washed with  $\text{NH}_4\text{Cl}$ ,  $\text{NaHCO}_3$  and saline solution (150 mL) successively. The organic layer was dried over  $\text{MgSO}_4$ , filtered, concentrated under reduced pressure, and purified by column chromatography on silica gel to provide extended  $\pi$ -conjugated ferrocenes **7**.

## IX. Calculated molecular conformations, photophysical and electrochemical properties

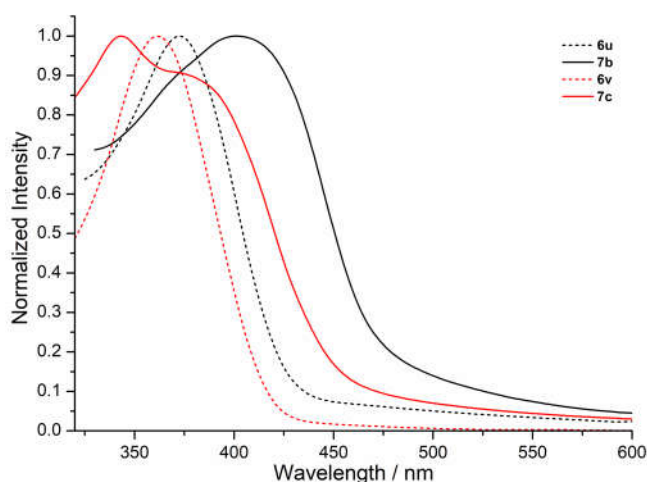

**Fig. S4** UV-Vis absorption spectra of **6u**, **6v**, **7b** and **7c** in  $\text{CH}_3\text{CN}$  ( $1 \times 10^{-5}$  M).

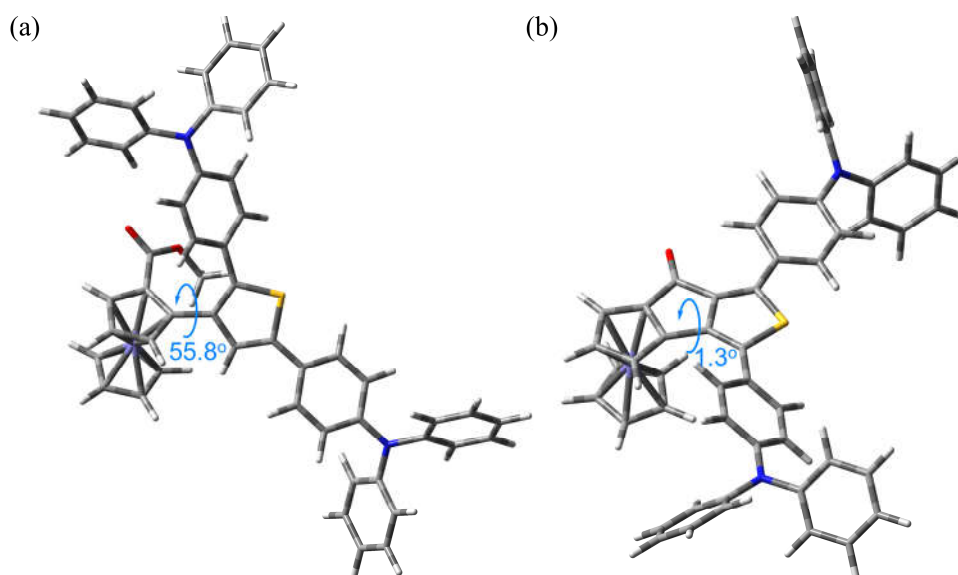

**Fig. S5** Calculated molecular conformation of (a) **6u** and (b) **7b**. Molecular optimization was performed by density functional theory computation with Gaussian 09 at the B3LYP/6-31G\* level.

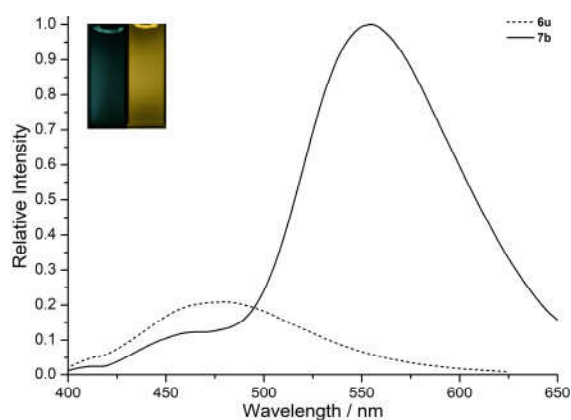

**Fig. S6** Fluorescence spectra of **6u** and **7b** in  $\text{CH}_3\text{CN}$  ( $1 \times 10^{-5}$  M). Inset: Fluorescent images of **6u** (left) and **7b** (right) in  $\text{CH}_3\text{CN}$  ( $1 \times 10^{-5}$  M) under UV light (365 nm).

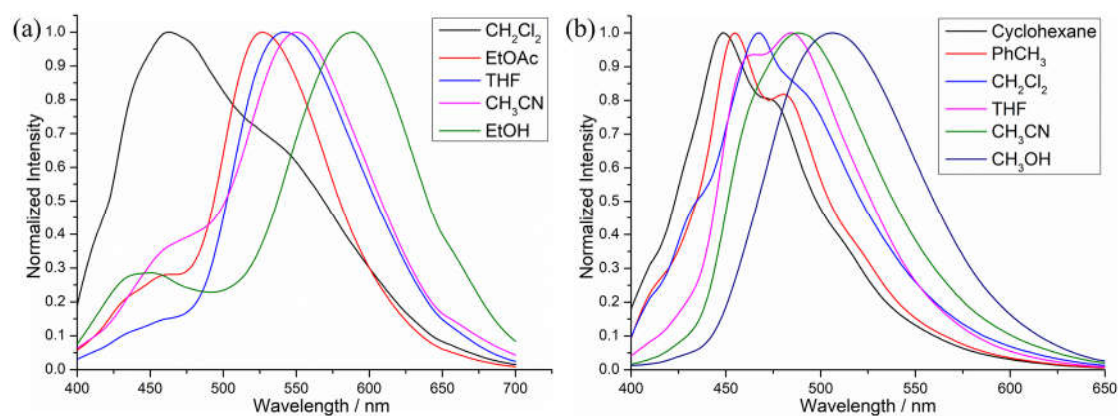

**Fig. S7** Fluorescence spectra of (a) **7b** and (b) **7c** in different solvents.

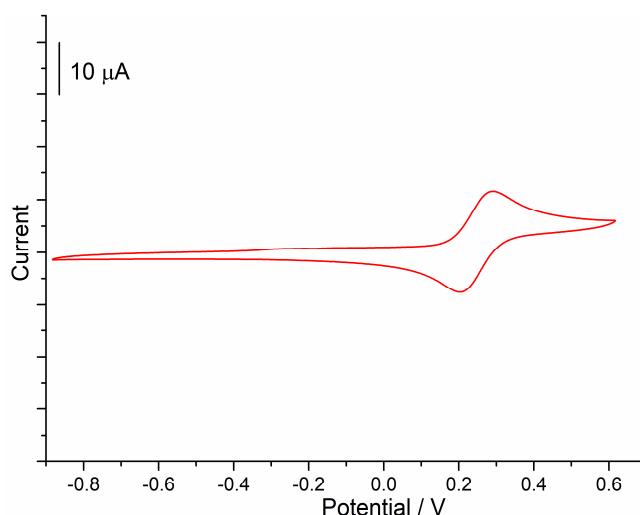

**Fig. S8** Cyclic voltammograms of **6v**. Measurements were carried out at a scan rate of 50 mV/s in CH<sub>3</sub>CN with **6v** ( $1 \times 10^{-3}$  M) containing *n*-Bu<sub>4</sub>NPF<sub>6</sub> (0.1 M), using Fc/Fc<sup>+</sup> (0.08 V) as reference. The three-electrode setup consisted of an Ag/Ag<sup>+</sup> (0.01 M of AgNO<sub>3</sub> in CH<sub>3</sub>CN) reference electrode, a platinum wire counter electrode, and a platinum plate working electrode.

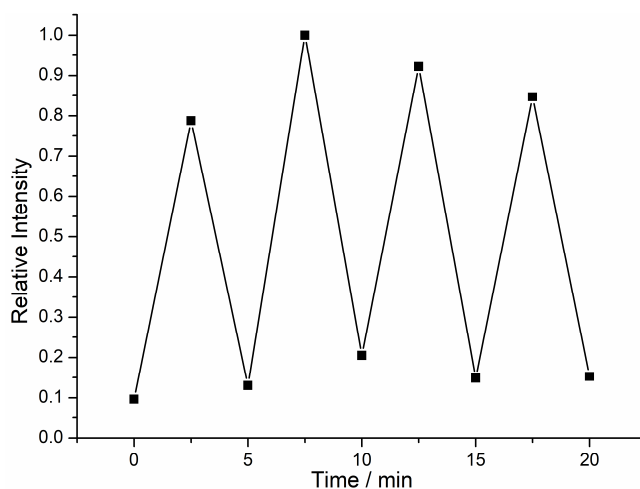

**Fig. S9** Changes by the evolution of the fluorescence intensity of **6v** at 432 nm with time. Stepwise oxidation and reduction cycles carried out in CH<sub>3</sub>CN with **6v** ( $5 \times 10^{-6}$  M) containing *n*-Bu<sub>4</sub>NPF<sub>6</sub> (0.1 M) by chronoamperometric analysis, which uses fixed potentials at + 0.48 V (for oxidation, vs Fc/Fc<sup>+</sup>) and – 0.62 V (for reduction, vs Fc/Fc<sup>+</sup>) changed every 150 s.

## X. Preparation and characterization of the described compounds

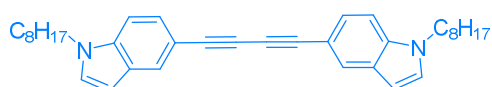

**1,4-Bis(1-octyl-1H-indol-5-yl)buta-1,3-diyne (2s)**

$^1\text{H}$  NMR (400 MHz,  $\text{CDCl}_3$ ):  $\delta$  = 0.87 (t,  $J$  = 7.2 Hz, 6H), 1.25-1.30 (m, 20H), 1.79-1.86 (m, 4H), 4.09 (t,  $J$  = 7.2 Hz, 4H), 6.48 (d,  $J$  = 2.8 Hz, 2H), 7.12 (d,  $J$  = 2.8 Hz, 2H), 7.28 (d,  $J$  = 8.4 Hz, 2H), 7.36 (dd,  $J$  = 8.4 Hz, 1.6 Hz, 2H), 7.85 (s, 2H) ppm.  $^{13}\text{C}$  NMR (100 MHz,  $\text{CDCl}_3$ ):  $\delta$  = 14.2, 22.7, 27.1, 29.29, 29.32, 30.4, 31.9, 46.7, 72.3, 82.8, 101.5, 109.7, 112.5, 125.8, 126.2, 128.5, 129.1, 136.1 ppm.

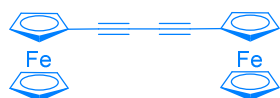

#### 1,4-Diferrocenylbuta-1,3-diyne (2t)

$^1\text{H}$  NMR (400 MHz,  $\text{CDCl}_3$ ):  $\delta$  = 4.25 (t,  $J$  = 2.0 Hz, 4H), 4.26 (s, 10H), 4.51 (t,  $J$  = 2.0 Hz, 4H) ppm.  $^{13}\text{C}$  NMR (100 MHz,  $\text{CDCl}_3$ ):  $\delta$  = 63.8, 69.4, 70.3, 71.1, 72.3, 79.2 ppm.

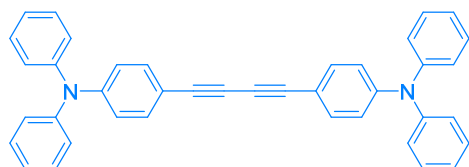

#### 4,4'-(buta-1,3-diyne-1,4-diyl)bis(*N,N*-diphenylaniline) (2u)

$^1\text{H}$  NMR (400 MHz,  $\text{CDCl}_3$ ):  $\delta$  = 6.95 (dt,  $J$  = 8.8 Hz, 2.0 Hz, 4H), 7.06-7.12 (m, 12H), 7.27-7.30 (m, 8H), 7.34 (dt,  $J$  = 8.8 Hz, 2.0 Hz, 4H) ppm.  $^{13}\text{C}$  NMR (100 MHz,  $\text{CDCl}_3$ ):  $\delta$  = 73.6, 82.1, 114.3, 121.7, 124.1, 125.5, 129.6, 133.5, 147.0, 148.7 ppm.

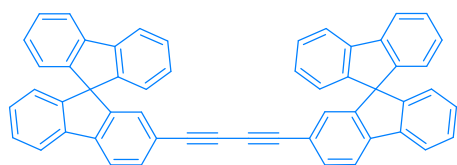

#### 1,4-Di(9,9'-spirobifluoren-2-yl)buta-1,3-diyne (2v)

$^1\text{H}$  NMR (400 MHz,  $\text{CDCl}_3$ ):  $\delta$  = 6.70 (d,  $J$  = 7.6 Hz, 4H), 6.74 (d,  $J$  = 7.6 Hz, 2H), 6.82 (s, 2H), 7.08-7.15 (m, 6H), 7.34-7.39 (m, 6H), 7.46 (dd,  $J$  = 8.0 Hz, 1.6 Hz, 2H), 7.76 (d,  $J$  = 8.0 Hz, 2H), 7.81-7.84 (m, 6H) ppm.  $^{13}\text{C}$  NMR (100 MHz,  $\text{CDCl}_3$ ):  $\delta$  = 65.8, 74.4, 82.4, 120.1, 120.2, 120.6, 120.9, 124.1, 124.3, 128.0, 128.1, 128.2, 128.7, 132.4, 140.9, 141.9, 142.8, 148.0, 149.1, 149.3 ppm.

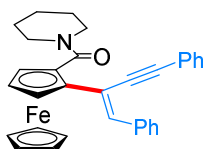

#### ***N*-[2-(1,4-diphenylbut-1-en-3-yn-2-yl)ferrocenylformyl]piperidine (4)**

M.p.: 84-87 °C.  $^1\text{H}$  NMR (400 MHz,  $\text{CDCl}_3$ ):  $\delta$  = 1.45-1.71 (m, 6H), 3.11-3.22 (m, 2H), 3.45-3.48 (m, 1H), 3.64-3.67 (m, 1H), 4.33 (t,  $J$  = 2.4 Hz, 1H), 4.40 (s, 5H), 4.57 (dd,  $J$  = 2.4 Hz, 1.6 Hz, 1H), 4.60 (dd,  $J$  = 2.4 Hz, 1.6 Hz, 1H), 6.93 (s, 1H), 7.31-7.44 (m, 6H), 7.67 (dt,  $J$  = 6.4 Hz, 1.6 Hz, 2H), 8.00 (d,  $J$  = 7.2 Hz, 2H) ppm.  $^{13}\text{C}$  NMR (100 MHz,  $\text{CDCl}_3$ ):  $\delta$  = 24.6, 25.3, 26.2, 43.1, 47.9, 65.9, 67.5, 71.7, 72.8, 85.0, 85.6, 88.8, 96.6, 119.8, 123.6, 128.1, 128.5, 128.59, 128.64, 128.8, 131.8, 132.4, 136.9, 167.7 ppm. ESI-HRMS: calcd for  $\text{C}_{32}\text{H}_{29}\text{FeNONa}$  [ $\text{M}+\text{Na}$ ] $^+$  522.1491, found 522.1487.

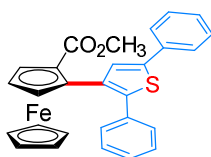

#### **Methyl 2-(2,5-diphenylthien-3-yl)ferrocene carboxylate (6a)**

Following the general procedure for regioselective addition/annulation reaction, compound **6a** was obtained as a yellow solid (38.8 mg, 81% yield) *via* column chromatography on silica gel (petroleum ether/ethyl acetate = 15/1, v/v). M.p.: 155-156 °C.  $^1\text{H}$  NMR (400 MHz,  $\text{CDCl}_3$ ):  $\delta$  = 3.58 (s, 3H), 4.25 (s, 5H), 4.36 (dd,  $J$  = 2.4 Hz, 1.6 Hz, 1H), 4.42 (t,  $J$  = 2.4 Hz, 1H), 4.88 (dd,  $J$  = 2.8 Hz, 1.6 Hz, 1H), 7.16-7.24 (m, 5H), 7.31-7.35 (m, 1H), 7.44 (t,  $J$  = 8.0 Hz, 2H), 7.69-7.72 (m, 3H) ppm.  $^{13}\text{C}$  NMR (100 MHz,  $\text{CDCl}_3$ ):  $\delta$  = 51.6, 70.0, 70.1, 70.8, 71.1, 74.6, 85.4, 125.9, 127.3, 127.6, 128.3, 128.7, 129.1, 129.2, 133.4, 134.5, 134.6, 140.1, 140.6, 171.7 ppm. ESI-HRMS: calcd for  $\text{C}_{28}\text{H}_{23}\text{FeO}_2\text{S}$  [ $\text{M}+\text{H}$ ] $^+$  479.0763, found 479.0770.

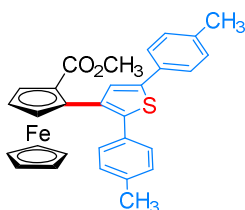

### Methyl 2-[2,5-di(4-methylphenyl)thien-3-yl]ferrocene carboxylate (**6b**)

Following the general procedure for regioselective addition/annulation reaction, compound **6b** was obtained as a yellow solid (38.2 mg, 75% yield) *via* column chromatography on silica gel (petroleum ether/ethyl acetate = 15/1, v/v). M.p.: 93-95 °C. <sup>1</sup>H NMR (400 MHz, CDCl<sub>3</sub>): δ = 2.29 (s, 3H), 2.40 (s, 3H), 3.58 (s, 3H), 4.24 (s, 5H), 4.34 (dd, *J* = 2.4 Hz, 1.6 Hz, 1H), 4.41 (t, *J* = 2.4 Hz, 1H), 4.87 (dd, *J* = 2.8 Hz, 1.6 Hz, 1H), 7.00-7.06 (m, 4H), 7.23 (d, *J* = 8.0 Hz, 2H), 7.58 (d, *J* = 8.4 Hz, 2H), 7.65 (s, 1H) ppm. <sup>13</sup>C NMR (100 MHz, CDCl<sub>3</sub>): δ = 21.3, 21.4, 51.6, 69.9, 70.1, 70.7, 71.1, 74.6, 85.7, 125.8, 128.5, 128.8, 129.0, 129.7, 131.8, 131.9, 132.8, 137.0, 137.4, 139.8, 140.3, 171.8 ppm. ESI-HRMS: calcd for C<sub>30</sub>H<sub>27</sub>FeO<sub>2</sub>S [M+H]<sup>+</sup> 507.1076, found 507.1082.

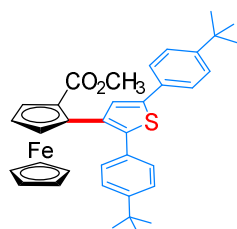

### Methyl 2-[2,5-di(4-*tert*-butylphenyl)thien-3-yl]ferrocene carboxylate (**6c**)

Following the general procedure for regioselective addition/annulation reaction, compound **6c** was obtained as a yellow solid (40.9 mg, 69% yield) *via* column chromatography on silica gel (petroleum ether/ethyl acetate = 15/1, v/v). M.p.: 92-94 °C. <sup>1</sup>H NMR (400 MHz, CDCl<sub>3</sub>): δ = 1.28 (s, 9H), 1.37 (s, 9H), 3.55 (s, 3H), 4.23 (s, 5H), 4.38-4.39 (m, 1H), 4.42 (t, *J* = 2.4 Hz, 1H), 4.87 (dd, *J* = 2.4 Hz, 1.6 Hz, 1H), 7.10 (d, *J* = 8.4 Hz, 2H), 7.22 (d, *J* = 8.4 Hz, 2H), 7.45 (d, *J* = 8.8 Hz, 2H), 7.62 (d, *J* = 8.8 Hz, 2H), 7.65 (s, 1H) ppm. <sup>13</sup>C NMR (100 MHz, CDCl<sub>3</sub>): δ = 31.4, 31.5, 34.7, 34.8, 51.6, 69.9, 70.1, 70.7, 71.1, 74.7, 85.6, 125.2, 125.6, 125.9, 128.2, 129.0, 131.8, 131.9, 132.8, 139.7, 140.2, 150.1, 150.6, 171.7 ppm. ESI-HRMS: calcd for C<sub>36</sub>H<sub>38</sub>FeO<sub>2</sub>SNa [M+Na]<sup>+</sup> 613.1834, found 613.1835.

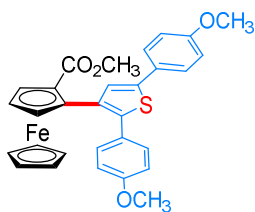

### Methyl 2-[2,5-di(4-methoxyphenyl)thien-3-yl]ferrocene carboxylate (**6d**)

Following the general procedure for regioselective addition/annulation reaction, compound **6d** was obtained as a yellow solid (39.6 mg, 74% yield) *via* column chromatography on silica gel (petroleum ether/ethyl acetate = 10/1, v/v). M.p.: 164-167 °C. <sup>1</sup>H NMR (400 MHz, CDCl<sub>3</sub>): δ = 3.60 (s, 3H), 3.77 (s, 3H), 3.86 (s, 3H), 4.24 (s, 5H), 4.33 (dd, *J* = 2.4 Hz, 1.6 Hz, 1H), 4.40 (t, *J* = 2.4 Hz, 1H), 4.87 (dd, *J* = 2.4 Hz, 1.6 Hz, 1H), 6.74 (dt, *J* = 8.8 Hz, 2.0 Hz, 2H), 6.96 (dt, *J* = 8.8 Hz, 2.0 Hz, 2H), 7.07 (dt, *J* = 8.8 Hz, 2.0 Hz, 2H), 7.58 (s, 1H), 7.61 (dt, *J* = 8.8 Hz, 2.0 Hz, 2H) ppm. <sup>13</sup>C NMR (100 MHz, CDCl<sub>3</sub>): δ = 51.6, 55.3, 55.5, 69.9, 70.0, 70.7, 71.1, 74.6, 85.7, 113.8, 114.4, 127.1, 127.3, 127.6, 128.3, 129.9, 132.5, 139.1, 139.8, 158.8, 159.2, 171.8 ppm. ESI-HRMS: calcd for C<sub>30</sub>H<sub>27</sub>FeO<sub>4</sub>S [M+H]<sup>+</sup> 539.0974, found 539.0977.

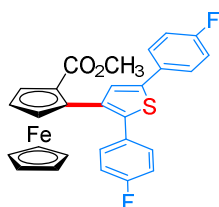

### Methyl 2-[2,5-di(4-fluorophenyl)thien-3-yl]ferrocene carboxylate (**6e**)

Following the general procedure for regioselective addition/annulation reaction, compound **6e** was obtained as a yellow solid (37.2 mg, 72% yield) *via* column chromatography on silica gel (petroleum ether/ethyl acetate = 15/1, v/v). M.p.: 141-143 °C. <sup>1</sup>H NMR (400 MHz, CDCl<sub>3</sub>): δ = 3.61 (s, 3H), 4.24 (s, 5H), 4.30-4.31 (m, 1H), 4.42 (t, *J* = 2.4 Hz, 1H), 4.87 (dd, *J* = 2.4 Hz, 1.6 Hz, 1H), 6.88-6.94 (m, 2H), 7.08-7.16 (m, 4H), 7.62-7.67 (m, 3H) ppm. <sup>13</sup>C NMR (100 MHz, CDCl<sub>3</sub>): δ = 51.6, 69.9, 70.1, 70.9, 71.2, 74.5, 85.2, 115.4 (d, *J* = 21.5 Hz), 116.1 (d, *J* = 21.7 Hz), 127.6 (d, *J* = 8.0 Hz), 129.2 (d, *J* = 0.8 Hz), 130.4 (d, *J* = 8.0 Hz), 130.6 (d, *J* = 3.4 Hz), 130.7 (d, *J* = 3.3 Hz), 133.5, 138.8 (d, *J* = 0.8 Hz), 139.5, 162.1 (d, *J* = 246.1 Hz), 162.5 (d, *J* = 245.8 Hz),

171.5 ppm.  $^{19}\text{F}$  NMR (376 MHz,  $\text{CDCl}_3$ ):  $\delta = -114.54 - -114.48$  (m, 1F),  $-114.47 - -114.41$  (m, 1F) ppm. ESI-HRMS: calcd for  $\text{C}_{28}\text{H}_{20}\text{F}_2\text{FeO}_2\text{SNa}$   $[\text{M}+\text{Na}]^+$  537.0394, found 537.0396.

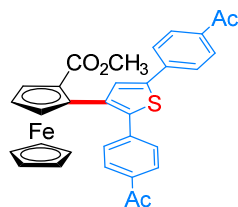

### Methyl 2-[2,5-di(4-acetylphenyl)thien-3-yl]ferrocene carboxylate (**6f**)

Following the general procedure for regioselective addition/annulation reaction, compound **6f** was obtained as a yellow solid (38.5 mg, 68% yield) *via* column chromatography on silica gel (petroleum ether/ethyl acetate = 10/1, v/v). M.p.: 169-172 °C.  $^1\text{H}$  NMR (400 MHz,  $\text{CDCl}_3$ ):  $\delta = 2.56$  (s, 3H), 2.65 (s, 3H), 3.59 (s, 3H), 4.27 (s, 5H), 4.35 (dd,  $J = 2.4$  Hz, 1.6 Hz, 1H), 4.47 (t,  $J = 2.4$  Hz, 1H), 4.92 (dd,  $J = 2.4$  Hz, 1.6 Hz, 1H), 7.24-7.26 (m, 2H), 7.77-7.82 (m, 4H), 7.86 (s, 1H), 8.04 (dt,  $J = 8.4$  Hz, 2.0 Hz, 2H) ppm.  $^{13}\text{C}$  NMR (100 MHz,  $\text{CDCl}_3$ ):  $\delta = 26.7, 26.8, 51.7, 70.0, 70.4, 71.2, 71.3, 74.6, 84.8, 125.7, 128.5, 128.6, 129.4, 131.1, 135.4, 135.7, 136.1, 138.6, 139.1, 140.2, 140.4, 171.4, 197.4, 197.6$  ppm. ESI-HRMS: calcd for  $\text{C}_{32}\text{H}_{26}\text{FeO}_4\text{SNa}$   $[\text{M}+\text{Na}]^+$  585.0793, found 585.0797.

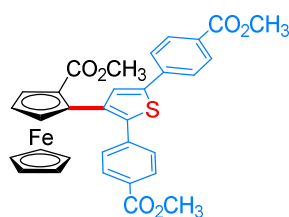

### Methyl 2-[2,5-di(4-methoxycarbonylphenyl)thien-3-yl]ferrocene carboxylate (**6g**)

Following the general procedure for regioselective addition/annulation reaction, compound **6g** was obtained as a yellow solid (39.0 mg, 66% yield) *via* column chromatography on silica gel (petroleum ether/ethyl acetate = 2/1, v/v). M.p.: 189-191 °C.  $^1\text{H}$  NMR (400 MHz,  $\text{CDCl}_3$ ):  $\delta = 3.58$  (s, 3H), 3.89 (s, 3H), 3.95 (s, 3H), 4.26 (s, 5H), 4.33 (dd,  $J = 2.8$  Hz, 1.6 Hz, 1H), 4.45 (t,  $J = 2.8$  Hz, 1H), 4.91 (dd,  $J = 2.8$  Hz,



1.6 Hz, 1H), 7.22 (dt,  $J = 8.4$  Hz, 2.0 Hz, 2H), 7.75 (dt,  $J = 8.4$  Hz, 2.0 Hz, 2H), 7.84 (s, 1H), 7.88 (dt,  $J = 8.4$  Hz, 2.0 Hz, 2H), 8.10 (dt,  $J = 8.4$  Hz, 2.0 Hz, 2H) ppm.  $^{13}\text{C}$  NMR (100 MHz,  $\text{CDCl}_3$ ):  $\delta = 51.7, 52.26, 52.34, 70.0, 70.3, 71.17, 71.24, 74.6, 84.8, 125.5, 128.4, 128.8, 129.2, 129.7, 130.5, 130.9, 135.2, 138.5, 139.0, 140.1, 140.4, 166.9, 171.4$  ppm. ESI-HRMS: calcd for  $\text{C}_{32}\text{H}_{26}\text{FeO}_6\text{SNa}$   $[\text{M}+\text{Na}]^+$  617.0692, found 617.0694.

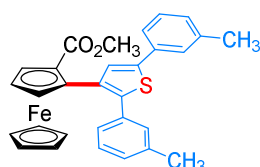

### Methyl 2-[2,5-di(3-methylphenyl)thien-3-yl]ferrocene carboxylate (6h)

Following the general procedure for regioselective addition/annulation reaction, compound **6h** was obtained as a yellow solid (36.2 mg, 71% yield) *via* column chromatography on silica gel (petroleum ether/ethyl acetate = 15/1, v/v). M.p.: 59-63 °C.  $^1\text{H}$  NMR (400 MHz,  $\text{CDCl}_3$ ):  $\delta = 2.25$  (s, 3H), 2.44 (s, 3H), 3.58 (s, 3H), 4.24 (s, 5H), 4.35 (dd,  $J = 2.4$  Hz, 1.6 Hz, 1H), 4.41 (t,  $J = 2.4$  Hz, 1H), 4.87 (dd,  $J = 2.4$  Hz, 1.6 Hz, 1H), 6.92 (d,  $J = 7.6$  Hz, 1H), 6.99-7.02 (m, 2H), 7.08 (t,  $J = 7.6$  Hz, 1H), 7.14 (d,  $J = 7.6$  Hz, 1H), 7.32 (t,  $J = 7.6$  Hz, 1H), 7.50-7.52 (m, 2H), 7.68 (s, 1H) ppm.  $^{13}\text{C}$  NMR (100 MHz,  $\text{CDCl}_3$ ):  $\delta = 21.5, 21.7, 51.6, 69.9, 70.1, 70.7, 71.1, 74.6, 85.5, 123.0, 125.8, 126.6, 128.0, 128.2, 128.4, 128.9, 129.1, 129.4, 133.2, 134.48, 134.51, 137.9, 138.7, 140.1, 140.6, 171.8$  ppm. ESI-HRMS: calcd for  $\text{C}_{30}\text{H}_{27}\text{FeO}_2\text{S}$   $[\text{M}+\text{H}]^+$  507.1076, found 507.1076.

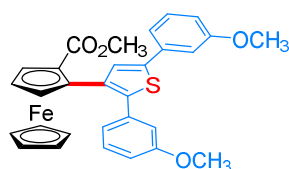

### Methyl 2-[2,5-di(3-methoxyphenyl)thien-3-yl]ferrocene carboxylate (6i)

Following the general procedure for regioselective addition/annulation reaction, compound **6i** was obtained as a yellow solid (39.5 mg, 73% yield) *via* column chromatography on silica gel (petroleum ether/ethyl acetate = 10/1, v/v).  $^1\text{H}$  NMR

(400 MHz, DMSO- $d_6$ ):  $\delta$  = 3.43 (s, 3H), 3.59 (s, 3H), 3.85 (s, 3H), 4.30 (s, 5H), 4.49 (br, 1H), 4.59 (br, 1H), 4.81 (br, 1H), 6.55 (s, 1H), 6.72 (d,  $J$  = 7.6 Hz, 1H), 6.78 (d,  $J$  = 8.4 Hz, 1H), 6.96 (d,  $J$  = 8.0 Hz, 1H), 7.17 (t,  $J$  = 8.0 Hz, 1H), 7.25 (s, 1H), 7.34 (d,  $J$  = 7.6 Hz, 1H), 7.41 (t,  $J$  = 8.0 Hz, 1H), 7.79 (s, 1H) ppm.  $^{13}\text{C}$  NMR (100 MHz, DMSO- $d_6$ ):  $\delta$  = 51.2, 54.9, 55.3, 69.7, 70.1, 70.2, 71.0, 74.1, 84.7, 111.0, 112.9, 113.2, 113.3, 117.9, 120.2, 129.6, 129.7, 130.4, 133.9, 134.8, 135.1, 138.4, 139.4, 158.9, 159.8, 170.4 ppm. ESI-HRMS: calcd for  $\text{C}_{30}\text{H}_{27}\text{FeO}_4\text{S}$   $[\text{M}+\text{H}]^+$  539.0974, found 539.0968.

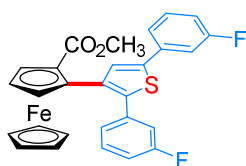

### Methyl 2-[2,5-di(3-fluorophenyl)thien-3-yl]ferrocene carboxylate (6j)

Following the general procedure for regioselective addition/annulation reaction, compound **6j** was obtained as a yellow solid (33.3 mg, 65% yield) *via* column chromatography on silica gel (petroleum ether/ethyl acetate = 15/1, v/v).  $^1\text{H}$  NMR (400 MHz,  $\text{CDCl}_3$ ):  $\delta$  = 3.61 (s, 3H), 4.26 (s, 5H), 4.35 (dd,  $J$  = 2.8 Hz, 1.6 Hz, 1H), 4.45 (t,  $J$  = 2.8 Hz, 1H), 4.91 (dd,  $J$  = 2.8 Hz, 1.6 Hz, 1H), 6.84-6.95 (m, 3H), 7.00-7.05 (m, 1H), 7.15-7.21 (m, 1H), 7.37-7.43 (m, 2H), 7.47 (dt,  $J$  = 8.0 Hz, 1.2 Hz, 1H), 7.72 (s, 1H) ppm.  $^{13}\text{C}$  NMR (100 MHz,  $\text{CDCl}_3$ ):  $\delta$  = 51.6, 69.9, 70.2, 71.1, 71.2, 74.5, 84.8, 112.6 (d,  $J$  = 22.6 Hz), 114.3 (d,  $J$  = 21.1 Hz), 114.5 (d,  $J$  = 21.1 Hz), 115.4 (d,  $J$  = 22.4 Hz), 121.6 (d,  $J$  = 2.8 Hz), 124.4 (d,  $J$  = 2.9 Hz), 129.9 (d,  $J$  = 8.5 Hz), 130.0, 130.6 (d,  $J$  = 8.6 Hz), 134.3, 136.39 (d,  $J$  = 8.1 Hz), 136.43 (d,  $J$  = 8.3 Hz), 139.0 (d,  $J$  = 2.5 Hz), 139.7 (d,  $J$  = 2.7 Hz), 162.5 (d,  $J$  = 244.5 Hz), 163.3 (d,  $J$  = 244.6 Hz), 171.5 ppm.  $^{19}\text{F}$  NMR (376 MHz,  $\text{CDCl}_3$ ):  $\delta$  = -112.95 – -112.88 (m, 1F), -112.68 – -112.62 (m, 1F) ppm. ESI-HRMS: calcd for  $\text{C}_{28}\text{H}_{21}\text{F}_2\text{FeO}_2\text{S}$   $[\text{M}+\text{H}]^+$  515.0574, found 515.0571.

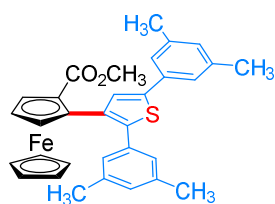

### Methyl 2-[2,5-di(3,5-dimethylphenyl)thien-3-yl]ferrocene carboxylate (6k)

Following the general procedure for regioselective addition/annulation reaction, compound **6k** was obtained as a yellow solid (38.5 mg, 72% yield) *via* column chromatography on silica gel (petroleum ether/ethyl acetate = 15/1, v/v). M.p.: 88-91 °C. <sup>1</sup>H NMR (400 MHz, CDCl<sub>3</sub>): δ = 2.19 (s, 6H), 2.40 (s, 6H), 3.58 (s, 3H), 4.24 (s, 5H), 4.34 (dd, *J* = 2.4 Hz, 1.6 Hz, 1H), 4.40 (t, *J* = 2.4 Hz, 1H), 4.87 (dd, *J* = 2.8 Hz, 1.6 Hz, 1H), 6.77 (s, 2H), 6.82 (s, 1H), 6.96 (s, 1H), 7.30 (s, 2H), 7.64 (s, 1H) ppm. <sup>13</sup>C NMR (100 MHz, CDCl<sub>3</sub>): δ = 21.4, 21.6, 51.6, 69.9, 70.0, 70.7, 71.1, 74.7, 85.6, 123.8, 126.5, 128.8, 128.9, 129.3, 133.0, 134.4, 134.5, 137.7, 138.6, 140.1, 140.6, 171.8 ppm. ESI-HRMS: calcd for C<sub>32</sub>H<sub>31</sub>FeO<sub>2</sub>S [M+H]<sup>+</sup> 535.1389, found 535.1395.

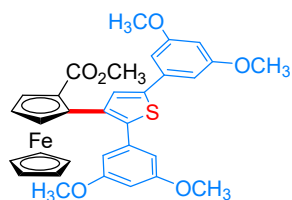

#### **Methyl 2-[2,5-di(3,5-dimethoxyphenyl)thien-3-yl]ferrocene carboxylate (6l)**

Following the general procedure for regioselective addition/annulation reaction, compound **6l** was obtained as a yellow solid (39.9 mg, 67% yield) *via* column chromatography on silica gel (petroleum ether/ethyl acetate = 7/1, v/v). M.p.: 125-129 °C. <sup>1</sup>H NMR (400 MHz, CDCl<sub>3</sub>): δ = 3.59 (s, 3H), 3.64 (s, 6H), 3.88 (s, 6H), 4.25 (s, 5H), 4.38-4.39 (m, 1H), 4.43 (t, *J* = 2.8 Hz, 1H), 4.88 (dd, *J* = 2.8 Hz, 1.6 Hz, 1H), 6.29-6.32 (m, 3H), 6.45 (t, *J* = 2.0 Hz, 1H), 6.84 (d, *J* = 2.0 Hz, 2H), 7.66 (s, 1H) ppm. <sup>13</sup>C NMR (100 MHz, CDCl<sub>3</sub>): δ = 51.6, 55.4, 55.6, 70.0, 70.2, 70.7, 71.1, 74.7, 85.4, 99.3, 100.1, 104.4, 106.5, 129.6, 133.5, 136.2, 136.4, 139.9, 140.4, 160.4, 161.2, 171.6 ppm. ESI-HRMS: calcd for C<sub>32</sub>H<sub>31</sub>FeO<sub>6</sub>S [M+H]<sup>+</sup> 599.1185, found 599.1181.

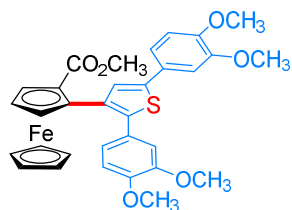

#### **Methyl 2-[2,5-di(3,4-dimethoxyphenyl)thien-3-yl]ferrocene carboxylate (6m)**

Following the general procedure for regioselective addition/annulation reaction, compound **6m** was obtained as a yellow solid (41.5 mg, 69% yield) *via* column chromatography on silica gel (petroleum ether/ethyl acetate = 6/1, v/v). M.p.: 153-156 °C. <sup>1</sup>H NMR (400 MHz, DMSO-*d*<sub>6</sub>): δ = 3.44 (s, 3H), 3.49 (s, 3H), 3.71 (s, 3H), 3.81 (s, 3H), 3.88 (s, 3H), 4.29 (s, 5H), 4.48 (br, 1H), 4.58 (t, *J* = 2.4 Hz, 1H), 4.80 (br, 1H), 6.50 (s, 1H), 6.71 (dd, *J* = 8.4 Hz, 2.0 Hz, 1H), 6.85 (d, *J* = 8.4 Hz, 1H), 7.05 (d, *J* = 8.4 Hz, 1H), 7.22 (s, 1H), 7.27 (dd, *J* = 8.4 Hz, 2.0 Hz, 1H), 7.64 (s, 1H) ppm. <sup>13</sup>C NMR (100 MHz, DMSO-*d*<sub>6</sub>): δ = 51.1, 55.0, 55.4, 55.62, 55.65, 69.4, 69.8, 69.9, 70.9, 74.1, 85.1, 109.2, 111.3, 111.6, 112.3, 117.9, 120.2, 126.5, 126.6, 128.4, 132.7, 137.8, 139.0, 147.9, 148.0, 148.7, 149.1, 170.4 ppm. ESI-HRMS: calcd for C<sub>32</sub>H<sub>31</sub>FeO<sub>6</sub>S [M+H]<sup>+</sup> 599.1185, found 599.1185.

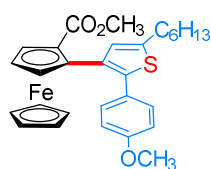

### Methyl 2-[5-hexyl-2-(4-methoxyphenyl)thien-3-yl]ferrocene carboxylate (**6n**)

Following the general procedure for regioselective addition/annulation reaction, CH<sub>3</sub>OH (2.0 mL) was used as solvent, and compound **6n** was obtained as a yellow liquid (13.8 mg, 27% yield) *via* column chromatography on silica gel (petroleum ether/ethyl acetate = 15/1, v/v). <sup>1</sup>H NMR (400 MHz, CDCl<sub>3</sub>): δ = 0.92 (t, *J* = 7.2 Hz, 3H), 1.33-1.38 (m, 4H), 1.44-1.50 (m, 2H), 1.73-1.80 (m, 2H), 2.86 (t, *J* = 7.6 Hz, 2H), 3.60 (s, 3H), 3.75 (s, 3H), 4.20 (s, 5H), 4.25 (dd, *J* = 2.8 Hz, 1.6 Hz, 1H), 4.35 (t, *J* = 2.8 Hz, 1H), 4.84 (dd, *J* = 2.8 Hz, 1.6 Hz, 1H), 6.71 (dt, *J* = 9.2 Hz, 2.8 Hz, 2H), 7.02 (dt, *J* = 8.8 Hz, 2.8 Hz, 2H), 7.15 (t, *J* = 0.8 Hz, 1H) ppm. <sup>13</sup>C NMR (100 MHz, CDCl<sub>3</sub>): δ = 14.3, 22.8, 29.1, 30.3, 31.81, 31.83, 51.5, 55.3, 69.8, 69.9, 70.6, 71.0, 74.7, 85.9, 113.6, 127.7, 129.9, 130.2, 131.0, 137.9, 141.6, 158.5, 171.9 ppm. ESI-HRMS: calcd for C<sub>29</sub>H<sub>32</sub>FeO<sub>3</sub>SNa [M+Na]<sup>+</sup> 539.1314, found 539.1311.

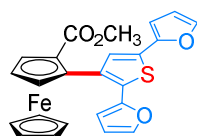

### Methyl 2-[2,5-di(furan-2-yl)thien-3-yl]ferrocene carboxylate (6o)

Following the general procedure for regioselective addition/annulation reaction, CH<sub>3</sub>OH (2.0 mL) was used as solvent, and compound **6o** was obtained as a yellow solid (20.7 mg, 45% yield) *via* column chromatography on silica gel (petroleum ether/ethyl acetate = 20/1, v/v). <sup>1</sup>H NMR (400 MHz, CDCl<sub>3</sub>): δ = 3.60 (s, 3H), 4.30 (s, 5H), 4.51-4.54 (m, 2H), 4.96 (dd, *J* = 2.4 Hz, 2.0 Hz, 1H), 5.81 (dd, *J* = 3.6 Hz, 0.8 Hz, 1H), 6.26 (dd, *J* = 3.6 Hz, 2.0 Hz, 1H), 6.49 (dd, *J* = 3.6 Hz, 2.0 Hz, 1H), 6.56 (dd, *J* = 3.6 Hz, 0.8 Hz, 1H), 7.28 (dd, *J* = 2.0 Hz, 0.8 Hz, 1H), 7.46 (dd, *J* = 2.0 Hz, 0.8 Hz, 1H), 7.54 (s, 1H) ppm. <sup>13</sup>C NMR (100 MHz, CDCl<sub>3</sub>): δ = 51.6, 70.1, 70.4, 70.7, 71.2, 74.5, 85.1, 105.5, 107.0, 111.7, 111.9, 128.4, 128.9, 130.0, 132.8, 141.3, 141.9, 149.0, 149.3, 171.7 ppm. ESI-HRMS: calcd for C<sub>24</sub>H<sub>19</sub>FeO<sub>4</sub>S [M+H]<sup>+</sup> 459.0348, found 459.0353.

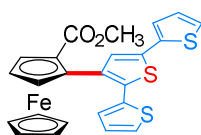

### Methyl 2-[2,5-di(thien-2-yl)thien-3-yl]ferrocene carboxylate (6p)

Following the general procedure for regioselective addition/annulation reaction, CH<sub>3</sub>OH (2.0 mL) was used as solvent, and compound **6p** was obtained as a yellow solid (25.8 mg, 53% yield) *via* column chromatography on silica gel (petroleum ether/ethyl acetate = 20/1, v/v). M.p.: 160-162 °C. <sup>1</sup>H NMR (400 MHz, CDCl<sub>3</sub>): δ = 3.62 (s, 3H), 4.28 (s, 5H), 4.47-4.48 (m, 1H), 4.50 (t, *J* = 2.8 Hz, 1H), 4.94 (dd, *J* = 2.8 Hz, 1.6 Hz, 1H), 6.82 (dd, *J* = 3.6 Hz, 1.2 Hz, 1H), 6.87 (dd, *J* = 5.2 Hz, 3.6 Hz, 1H), 7.06 (dd, *J* = 5.2 Hz, 3.6 Hz, 1H), 7.11 (dd, *J* = 4.8 Hz, 1.2 Hz, 1H), 7.23 (dd, *J* = 3.6 Hz, 1.2 Hz, 1H), 7.25-7.26 (m, 1H), 7.50 (s, 1H) ppm. <sup>13</sup>C NMR (100 MHz, CDCl<sub>3</sub>): δ = 51.7, 70.2, 70.8, 70.9, 71.1, 74.9, 84.7, 123.9, 124.6, 125.3, 125.8, 127.2, 128.1, 129.9, 132.7, 133.4, 133.6, 136.1, 137.3, 171.6 ppm. ESI-HRMS: calcd for C<sub>24</sub>H<sub>19</sub>FeO<sub>2</sub>S<sub>3</sub> [M+H]<sup>+</sup> 490.9891, found 490.9896.

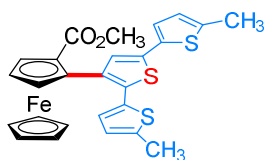

### Methyl 2-[2,5-di(5-methylthien-2-yl)thien-3-yl]ferrocene carboxylate (**6q**)

Following the general procedure for regioselective addition/annulation reaction, CH<sub>3</sub>OH (2.0 mL) was used as solvent, and compound **6q** was obtained as a yellow solid (35.4 mg, 68% yield) *via* column chromatography on silica gel (petroleum ether/ethyl acetate = 20/1, v/v). M.p.: 153-157 °C. <sup>1</sup>H NMR (400 MHz, CDCl<sub>3</sub>): δ = 2.36 (s, 3H), 2.51 (s, 3H), 3.64 (s, 3H), 4.27 (s, 5H), 4.47-4.49 (m, 2H), 4.93 (t, *J* = 2.0 Hz, 1H), 6.50 (dd, *J* = 3.6 Hz, 0.8 Hz, 1H), 6.58 (d, *J* = 3.6 Hz, 1H), 6.70 (dd, *J* = 3.6 Hz, 0.8 Hz, 1H), 6.99 (d, *J* = 3.2 Hz, 1H), 7.39 (s, 1H) ppm. <sup>13</sup>C NMR (100 MHz, CDCl<sub>3</sub>): δ = 15.4, 15.6, 51.7, 70.1, 70.7, 70.8, 71.1, 75.0, 84.9, 123.6, 125.4, 125.6, 126.1, 129.3, 132.6, 132.7, 133.2, 133.9, 135.0, 139.2, 139.9, 171.8 ppm. ESI-HRMS: calcd for C<sub>26</sub>H<sub>23</sub>FeO<sub>2</sub>S<sub>3</sub> [M+H]<sup>+</sup> 519.0204, found 519.0205.

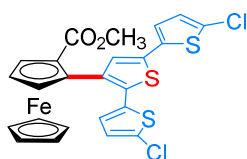

### Methyl 2-[2,5-di(5-chlorothien-2-yl)thien-3-yl]ferrocene carboxylate (**6r**)

Following the general procedure for regioselective addition/annulation reaction, CH<sub>3</sub>OH (2.0 mL) was used as solvent, and compound **6r** was obtained as a yellow solid (26.3 mg, 47% yield) *via* column chromatography on silica gel (petroleum ether/ethyl acetate = 20/1, v/v). M.p.: 152-155 °C. <sup>1</sup>H NMR (400 MHz, CDCl<sub>3</sub>): δ = 3.67 (s, 3H), 4.28 (s, 5H), 4.46 (br, 1H), 4.52 (br, 1H), 4.96 (br, 1H), 6.62 (d, *J* = 4.0 Hz, 1H), 6.68 (d, *J* = 4.0 Hz, 1H), 6.87 (d, *J* = 4.0 Hz, 1H), 6.98 (d, *J* = 4.0 Hz, 1H), 7.40 (s, 1H) ppm. <sup>13</sup>C NMR (100 MHz, CDCl<sub>3</sub>): δ = 51.8, 70.5, 70.6, 71.16, 71.22, 75.0, 84.0, 123.2, 125.0, 126.2, 127.2, 129.0, 129.8, 130.1, 132.2, 132.6, 134.0, 134.6, 135.6, 171.4 ppm. ESI-HRMS: calcd for C<sub>24</sub>H<sub>17</sub><sup>35</sup>Cl<sub>2</sub>FeO<sub>2</sub>S<sub>3</sub> [M+H]<sup>+</sup> 558.9112, found 558.9108; C<sub>24</sub>H<sub>17</sub><sup>35</sup>Cl<sup>37</sup>ClFeO<sub>2</sub>S<sub>3</sub> [M+H]<sup>+</sup> 560.9082, found 560.9085; C<sub>24</sub>H<sub>17</sub><sup>37</sup>Cl<sub>2</sub>FeO<sub>2</sub>S<sub>3</sub> [M+H]<sup>+</sup> 562.9053, found 562.9049.

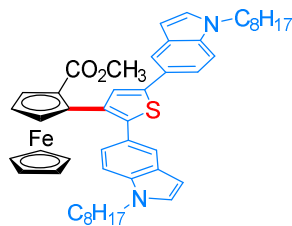

### Methyl 2-[2,5-di(1-octyl-1H-indol-5-yl)thien-3-yl]ferrocene carboxylate (**6s**)

Following the general procedure for regioselective addition/annulation reaction, 1,2-dichloroethane (1.0 mL) and CH<sub>3</sub>OH (1.0 mL) were used as solvent, and compound **6s** was obtained as a yellow liquid (47.8 mg, 61% yield) *via* column chromatography on silica gel (petroleum ether/ethyl acetate = 15/1, v/v). <sup>1</sup>H NMR (400 MHz, CDCl<sub>3</sub>): δ = 0.86-0.90 (m, 6H), 1.29-1.34 (m, 20H), 1.80 (t, *J* = 6.8 Hz, 2H), 1.87 (t, *J* = 6.8 Hz, 2H), 3.60 (s, 3H), 4.05 (t, *J* = 7.2 Hz, 2H), 4.14 (t, *J* = 7.2 Hz, 2H), 4.25 (s, 5H), 4.34-4.35 (m, 2H), 4.88 (dd, *J* = 2.4 Hz, 1.6 Hz, 1H), 6.40 (d, *J* = 3.2 Hz, 1H), 6.55 (d, *J* = 2.8 Hz, 1H), 6.97 (dd, *J* = 8.4 Hz, 1.6 Hz, 1H), 7.05 (d, *J* = 3.2 Hz, 1H), 7.13-7.15 (m, 2H), 7.39 (d, *J* = 8.4 Hz, 1H), 7.52 (s, 1H), 7.58 (dd, *J* = 8.4 Hz, 1.6 Hz, 1H), 7.69 (s, 1H), 7.96 (s, 1H) ppm. <sup>13</sup>C NMR (100 MHz, CDCl<sub>3</sub>): δ = 14.2, 22.8, 27.2, 29.3, 29.4, 29.9, 30.4, 30.5, 31.91, 31.93, 46.6, 46.7, 51.6, 69.7, 70.2, 70.6, 71.0, 74.9, 86.1, 101.37, 101.40, 109.1, 109.9, 118.3, 120.4, 121.3, 123.0, 126.1, 126.6, 128.2, 128.3, 128.6, 128.8, 129.1, 131.8, 135.3, 135.7, 140.8, 141.4, 172.1 ppm. ESI-HRMS: calcd for C<sub>48</sub>H<sub>57</sub>FeN<sub>2</sub>O<sub>2</sub>S [M+H]<sup>+</sup> 781.3485, found 781.3481.

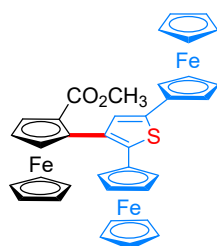

### Methyl 2-(2,5-diferrocenylthien-3-yl)ferrocene carboxylate (**6t**)

Following the general procedure for regioselective addition/annulation reaction, 1,2-dichloroethane (1.0 mL) and CH<sub>3</sub>OH (1.0 mL) were used as solvent, and compound **6t** was obtained as a red solid (36.3 mg, 52% yield) *via* column chromatography on silica gel (petroleum ether/ethyl acetate = 15/1, v/v). M.p.:

113-117 °C. <sup>1</sup>H NMR (400 MHz, CDCl<sub>3</sub>): δ = 3.62 (s, 3H), 4.04-4.05 (m, 1H), 4.06 (s, 5H), 4.08-4.09 (m, 1H), 4.11-4.12 (m, 1H), 4.14-4.15 (m, 1H), 4.21 (s, 5H), 4.24 (s, 5H), 4.32 (t, *J* = 1.6 Hz, 2H), 4.40 (dd, *J* = 2.4 Hz, 1.6 Hz, 1H), 4.44 (t, *J* = 2.4 Hz, 1H), 4.63-4.65 (m, 2H), 4.89 (dd, *J* = 2.4 Hz, 1.6 Hz, 1H), 7.19 (s, 1H) ppm. <sup>13</sup>C NMR (100 MHz, CDCl<sub>3</sub>): δ = 51.5, 66.9, 67.0, 68.1, 68.2, 68.3, 68.7, 69.7, 70.0, 70.1, 70.5, 70.6, 70.9, 74.6, 80.2, 80.7, 86.2, 128.0, 132.1, 137.5, 137.7, 171.7 ppm. ESI-HRMS: calcd for C<sub>36</sub>H<sub>31</sub>Fe<sub>3</sub>O<sub>2</sub>S [M+H]<sup>+</sup> 695.0088, found 695.0091.

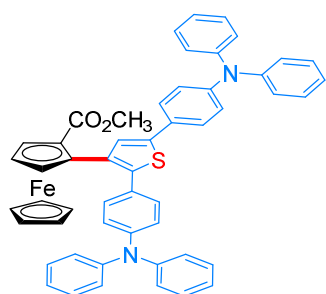

#### **Methyl 2-[2,5-di(4-diphenylaminophenyl)thien-3-yl]ferrocene carboxylate (6u)**

Following the general procedure for regioselective addition/annulation reaction, 1,2-dichloroethane (2.0 mL) and CH<sub>3</sub>OH (2.0 mL) were used as solvent, and the reaction mixture was stirred at 120 °C for 24 h under an N<sub>2</sub> atmosphere. Then, compound **6u** was obtained as a yellow solid (23.8 mg, 29% yield) *via* column chromatography on silica gel (petroleum ether/ethyl acetate/dichloromethane = 20/1/2, v/v/v). M.p.: 122-124 °C. <sup>1</sup>H NMR (400 MHz, CDCl<sub>3</sub>): δ = 3.60 (s, 3H), 4.24 (s, 5H), 4.42 (br, 1H), 4.43 (br, 1H), 4.85 (t, *J* = 2.0 Hz, 1H), 6.89 (d, *J* = 8.4 Hz, 2H), 6.98-7.03 (m, 5H), 7.05-7.07 (m, 6H), 7.11-7.16 (m, 6H), 7.22-7.30 (m, 7H), 7.54 (d, *J* = 8.8 Hz, 2H), 7.58 (s, 1H) ppm. <sup>13</sup>C NMR (100 MHz, CDCl<sub>3</sub>): δ = 51.6, 69.9, 70.2, 70.7, 71.1, 74.5, 85.9, 123.1, 123.2, 124.0, 124.58, 124.60, 126.6, 128.4, 128.7, 128.8, 129.3, 129.4, 129.5, 132.8, 139.2, 139.8, 146.8, 147.3, 147.6, 147.7, 171.6 ppm. ESI-HRMS: calcd for C<sub>52</sub>H<sub>41</sub>FeN<sub>2</sub>O<sub>2</sub>S [M+H]<sup>+</sup> 813.2233, found 813.2230.



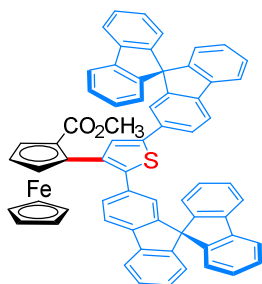

### Methyl 2-[2,5-di(9,9'-spirobifluoren-2-yl)thien-3-yl]ferrocene carboxylate (**6v**)

Following the general procedure for regioselective addition/annulation reaction, 1,2-dichloroethane (2.0 mL) and CH<sub>3</sub>OH (2.0 mL) were used as solvent, and the reaction mixture was stirred at 120 °C for 24 h under an N<sub>2</sub> atmosphere. Then, compound **6v** was obtained as a yellow solid (34.2 mg, 36% yield) *via* column chromatography on silica gel (petroleum ether/ethyl acetate/dichloromethane = 10/1/2, v/v/v). M.p.: 204-206 °C. <sup>1</sup>H NMR (400 MHz, CDCl<sub>3</sub>): δ = 3.35 (s, 3H), 4.07-4.11 (m, 7H), 4.49 (dd, *J* = 2.8 Hz, 1.6 Hz, 1H), 6.24 (d, *J* = 2.0 Hz, 1H), 6.61-6.67 (m, 3H), 6.71 (d, *J* = 7.6 Hz, 1H), 6.77 (d, *J* = 7.6 Hz, 2H), 6.88 (d, *J* = 1.6 Hz, 1H), 7.01-7.14 (m, 7H), 7.28-7.40 (m, 7H), 7.62 (d, *J* = 8.0 Hz, 1H), 7.66 (dd, *J* = 8.0 Hz, 1.6 Hz, 1H), 7.72-7.77 (m, 3H), 7.83-7.87 (m, 4H) ppm. <sup>13</sup>C NMR (100 MHz, CDCl<sub>3</sub>): δ = 51.3, 65.8, 66.1, 69.4, 69.8, 70.8, 70.9, 74.0, 85.2, 119.8, 119.9, 120.0, 120.08, 120.10, 120.18, 120.19, 120.5, 121.5, 124.0, 124.08, 124.12, 124.25, 124.34, 125.5, 127.68, 127.72, 127.8, 127.89, 127.90, 127.93, 127.99, 128.02, 128.1, 128.2, 128.9, 133.5, 134.0, 134.2, 139.9, 140.5, 140.7, 141.3, 141.35, 141.41, 141.7, 141.8, 141.86, 141.89, 148.3, 148.5, 148.56, 148.62, 149.2, 149.3, 149.7, 171.4 ppm. ESI-HRMS: calcd for C<sub>66</sub>H<sub>42</sub>FeO<sub>2</sub>SNa [M+Na]<sup>+</sup> 977.2147, found 977.2150.

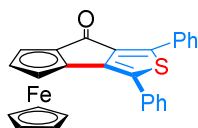

### 1,3-Diphenyl-7H-ferrocene[1',2':3,4]cyclopenta[1,2-c]thiophen-7-one (**7a**)

Following the general procedure for synthesis of extended π-conjugated ferrocenes, 4 M of NaOH solution (5 mL) was added to the solution of the thienylferrocene **6a** (239.2 mg, 0.5 mmol) and EtOH (15 mL) in the first step. Then, oxalyl chloride (68 μL,

0.8 mmol) and  $\text{AlCl}_3$  (266.7 mg, 2.0 mmol) was used respectively in the next steps. Compound **7a** was obtained as an orange solid (141.8 mg, 64% yield) *via* column chromatography on silica gel (petroleum ether/ethyl acetate = 20/1, v/v). M.p.: 181-184 °C.  $^1\text{H}$  NMR (400 MHz,  $\text{CDCl}_3$ ):  $\delta$  = 3.92 (s, 5H), 4.68 (br, 1H), 5.07 (br, 1H), 5.14 (br, 1H), 7.36 (t,  $J$  = 7.2 Hz, 1H), 7.45 (t,  $J$  = 7.6 Hz, 2H), 7.50-7.55 (m, 2H), 7.61 (t,  $J$  = 7.6 Hz, 1H), 7.71 (d,  $J$  = 7.6 Hz, 2H), 8.00 (d,  $J$  = 8.0 Hz, 1H), 8.46 (d,  $J$  = 8.0 Hz, 1H) ppm.  $^{13}\text{C}$  NMR (100 MHz,  $\text{CDCl}_3$ ):  $\delta$  = 69.3, 69.7, 71.0, 72.0, 83.1, 83.6, 124.1, 125.9, 127.9, 128.4, 128.9, 129.2, 130.6, 131.9, 132.4, 133.5, 135.0, 136.1, 137.7, 143.4, 194.2 ppm. ESI-HRMS: calcd for  $\text{C}_{27}\text{H}_{18}\text{FeOSNa}$   $[\text{M}+\text{Na}]^+$  469.0320, found 469.0318.

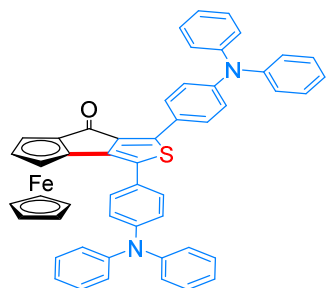

**1,3-Di(4-diphenylaminophenyl)-7H-ferrocene[1',2':3,4]cyclopenta[1,2-c]thiophen-7-one (7b)**

Following the general procedure for synthesis of extended  $\pi$ -conjugated ferrocenes, compound **7b** was obtained as a yellow solid (79.4 mg, 34% yield) *via* column chromatography on silica gel (petroleum ether/ethyl acetate/dichloromethane = 20/1/2, v/v/v). M.p.: 99-102 °C.  $^1\text{H}$  NMR (400 MHz,  $\text{CDCl}_3$ ):  $\delta$  = 3.93 (s, 5H), 4.64 (br, 1H), 5.02 (br, 1H), 5.05 (br, 1H), 7.03-7.18 (m, 15H), 7.27-7.32 (m, 8H), 7.38 (br, 1H), 7.55 (d,  $J$  = 8.8 Hz, 2H), 7.83 (d,  $J$  = 8.8 Hz, 1H), 8.10 (d,  $J$  = 2.4 Hz, 1H) ppm.  $^{13}\text{C}$  NMR (100 MHz,  $\text{CDCl}_3$ ):  $\delta$  = 69.0, 69.7, 71.0, 71.9, 83.2, 83.7, 123.0, 123.3, 123.4, 123.5, 123.8, 124.8, 124.9, 126.6, 127.4, 129.5, 129.7, 130.1, 135.5, 136.1, 136.2, 142.2, 147.2, 147.4, 147.5, 147.9, 193.9 ppm. ESI-HRMS: calcd for  $\text{C}_{51}\text{H}_{36}\text{FeN}_2\text{OSNa}$   $[\text{M}+\text{Na}]^+$  803.1790, found 803.1794.

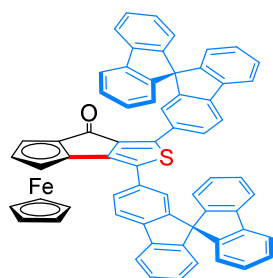

### 1,3-Di(9,9'-spirobifluoren-2-yl)-7H-ferrocene[1',2':3,4]cyclopenta[1,2-c]thiophen-7-one (7c)

Following the general procedure for synthesis of extended  $\pi$ -conjugated ferrocenes, compound **7c** was obtained as a yellow solid (146.6 mg, 53% yield) *via* column chromatography on silica gel (petroleum ether/ethyl acetate/dichloromethane = 10/1/2, v/v/v). M.p.: > 250 °C.  $^1\text{H}$  NMR (400 MHz,  $\text{CDCl}_3$ ):  $\delta$  = 3.85 (s, 5H), 4.61 (br, 1H), 4.95 (br, 1H), 5.08 (br, 1H), 6.66-6.82 (m, 6H), 6.95 (d,  $J$  = 1.2 Hz, 1H), 7.06-7.18 (m, 7H), 7.23 (s, 1H), 7.34-7.43 (m, 6H), 7.57 (dd,  $J$  = 8.0 Hz, 1.6 Hz, 1H), 7.81 (t,  $J$  = 8.0 Hz, 2H), 7.87-7.94 (m, 4H), 7.99 (d,  $J$  = 7.6 Hz, 1H), 8.86 (s, 1H) ppm.  $^{13}\text{C}$  NMR (100 MHz,  $\text{CDCl}_3$ ):  $\delta$  = 66.1, 66.2, 68.6, 69.8, 71.0, 71.9, 83.5, 83.8, 120.2, 120.3, 120.4, 120.6, 121.0, 121.1, 121.6, 123.97, 124.03, 124.1, 124.16, 124.20, 124.27, 124.31, 124.4, 126.3, 127.9, 127.99, 128.03, 128.13, 128.15, 128.20, 128.25, 128.3, 128.8, 131.6, 133.0, 135.9, 136.1, 137.2, 140.5, 140.9, 141.77, 141.83, 141.9, 142.0, 142.2, 143.0, 148.1, 148.3, 148.4, 148.5, 149.40, 149.41, 149.6, 152.9, 194.8 ppm. ESI-HRMS: calcd for  $\text{C}_{65}\text{H}_{38}\text{FeOSNa}$  [ $\text{M}+\text{Na}$ ] $^+$  945.1885, found 945.1882.

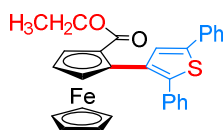

### Ethyl 2-(2,5-diphenylthien-3-yl)ferrocene carboxylate (10)

M.p.: 45-46 °C.  $^1\text{H}$  NMR (400 MHz,  $\text{CDCl}_3$ ):  $\delta$  = 1.19 (t,  $J$  = 7.2 Hz, 3H), 3.94-4.16 (m, 2H), 4.25 (s, 5H), 4.33 (dd,  $J$  = 2.8 Hz, 1.6 Hz, 1H), 4.41 (t,  $J$  = 2.8 Hz, 1H), 4.90 (dd,  $J$  = 2.4 Hz, 1.6 Hz, 1H), 7.16-7.24 (m, 5H), 7.30-7.35 (m, 1H), 7.44 (t,  $J$  = 7.6 Hz, 2H), 7.69-7.72 (m, 2H), 7.73 (s, 1H) ppm.  $^{13}\text{C}$  NMR (100 MHz,  $\text{CDCl}_3$ ):  $\delta$  = 14.5, 60.2, 69.9, 70.5, 70.8, 71.1, 74.5, 85.6, 125.8, 127.2, 127.6, 128.3, 128.7, 129.1, 129.5, 133.5,

134.51, 134.55, 140.0, 140.4, 171.1 ppm. ESI-HRMS: calcd for C<sub>29</sub>H<sub>25</sub>FeO<sub>2</sub>S [M+H]<sup>+</sup> 493.0919, found 493.0921.

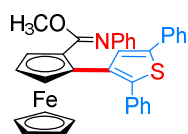

### Methyl *N*-phenyl-2-(2,5-diphenylthien-3-yl)ferrocene carbimidate (**11**)

M.p.: 169–173 °C. <sup>1</sup>H NMR (400 MHz, CDCl<sub>3</sub>): δ = 3.88 (s, 3H), 4.02 (dd, *J* = 2.4 Hz, 1.6 Hz, 1H), 4.09 (t, *J* = 2.4 Hz, 1H), 4.18 (s, 5H), 4.18–4.19 (m, 1H), 6.38 (d, *J* = 7.2 Hz, 2H), 6.80 (t, *J* = 7.6 Hz, 1H), 6.87–6.90 (m, 2H), 7.03 (t, *J* = 7.6 Hz, 2H), 7.18–7.20 (m, 3H), 7.34 (t, *J* = 7.6 Hz, 1H), 7.46 (t, *J* = 8.0 Hz, 2H), 7.57 (s, 1H), 7.70 (dd, *J* = 8.4 Hz, 1.2 Hz, 2H) ppm. <sup>13</sup>C NMR (100 MHz, CDCl<sub>3</sub>): δ = 54.1, 68.2, 70.7, 70.9, 71.2, 76.1, 82.7, 121.4, 122.6, 125.7, 127.3, 127.7, 128.1, 128.2, 128.5, 129.17, 129.18, 134.1, 134.2, 134.6, 138.6, 140.9, 148.6, 160.7 ppm. ESI-HRMS: calcd for C<sub>34</sub>H<sub>28</sub>FeNOS [M+H]<sup>+</sup> 554.1236, found 554.1232.

## XI. References

- 1 Y.-H. Liu, P.-X. Li, Q.-J. Yao, Z.-Z. Zhang, D.-Y. Huang, M. D. Le, H. Song, L. Liu and B.-F. Shi, *Org. Lett.*, 2019, **21**, 1895–1899.
- 2 T. Wang, J. Du, S. Ye, L. Tan and J. Fu, *ACS Appl. Mater. Interfaces*, 2019, **11**, 4425–4438.
- 3 G. Zhang, H. Yi, H. Chen, C. Bian, C. Liu and A. Lei, *Org. Lett.*, 2014, **16**, 6156–6159.
- 4 X. Li, X. Liu, H. Chen, W. Wu, C. Qi and H. Jiang, *Angew. Chem., Int. Ed.*, 2014, **53**, 14485–14489.
- 5 R. S. Jordan, Y. L. Li, C.-W. Lin, R. D. McCurdy, J. B. Lin, J. L. Brosmer, K. L. Marsh, S. I. Khan, K. N. Houk, R. B. Kaner and Y. Rubin, *J. Am. Chem. Soc.*, 2017, **139**, 15878–15890.
- 6 T. Yang, W. Moreira, S. A. Nyantakyi, H. Chen, D. Aziz, M.-L. Go and T. Dick, *J. Med. Chem.*, 2017, **60**, 2745–2763.
- 7 P. Chen, C. Liu, J. Hu, H. Zhang and R. Sun, *J. Organomet. Chem.*, 2018, **854**, 113–121.

## XII. Copies of $^1\text{H}$ , $^{13}\text{C}$ and $^1\text{H}$ - $^1\text{H}$ NOESY NMR spectra

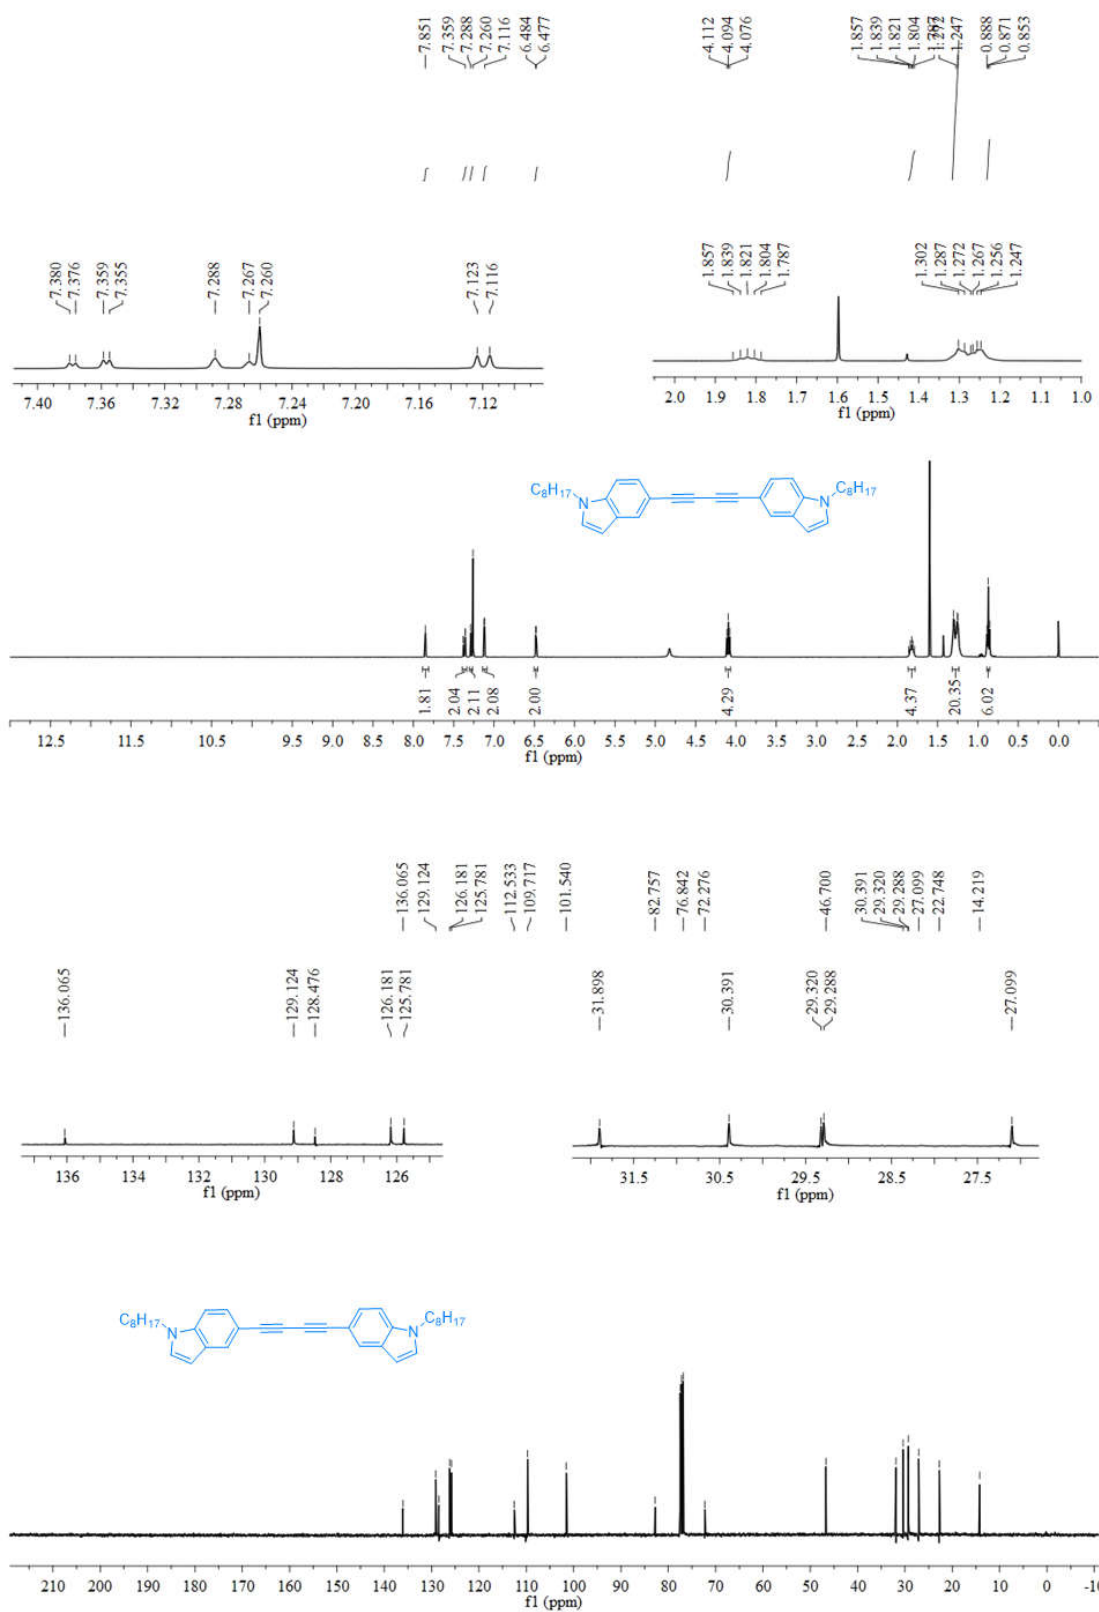

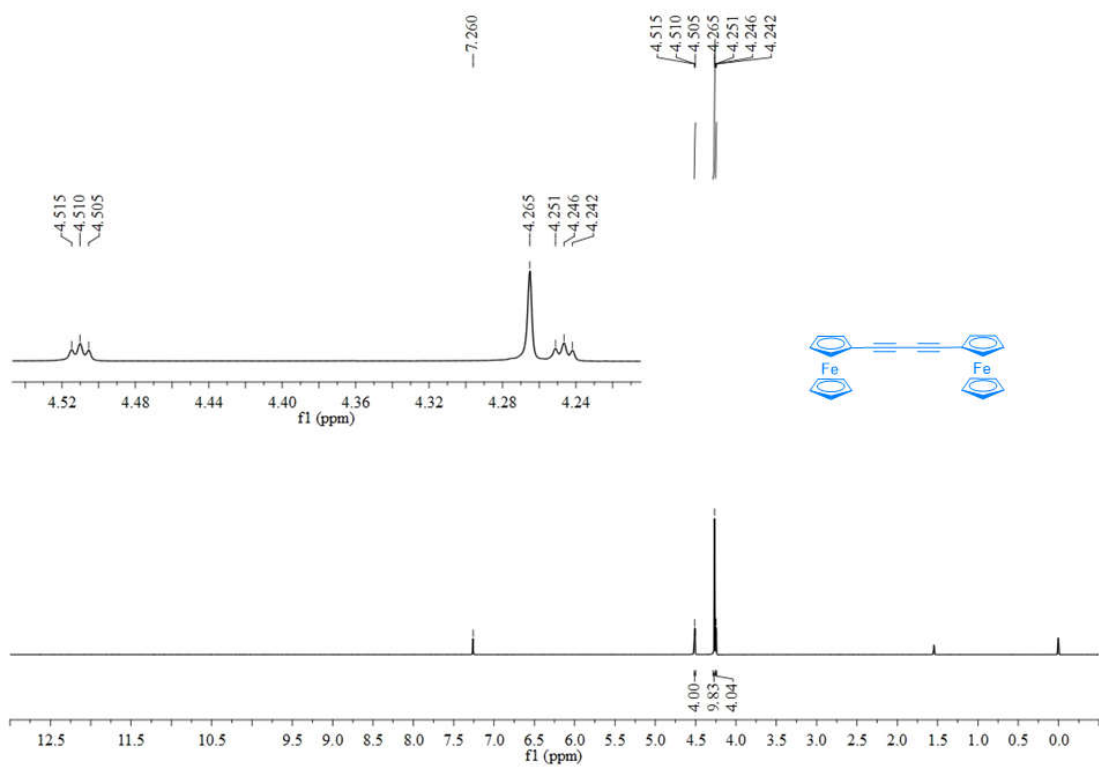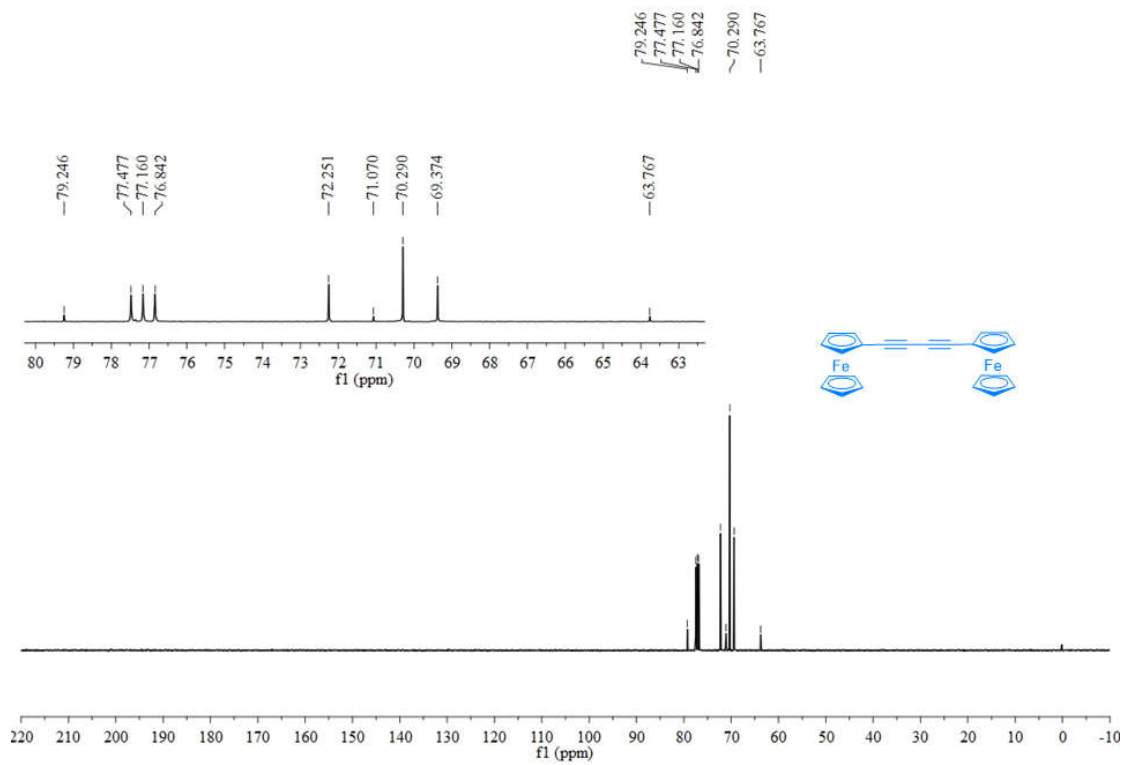

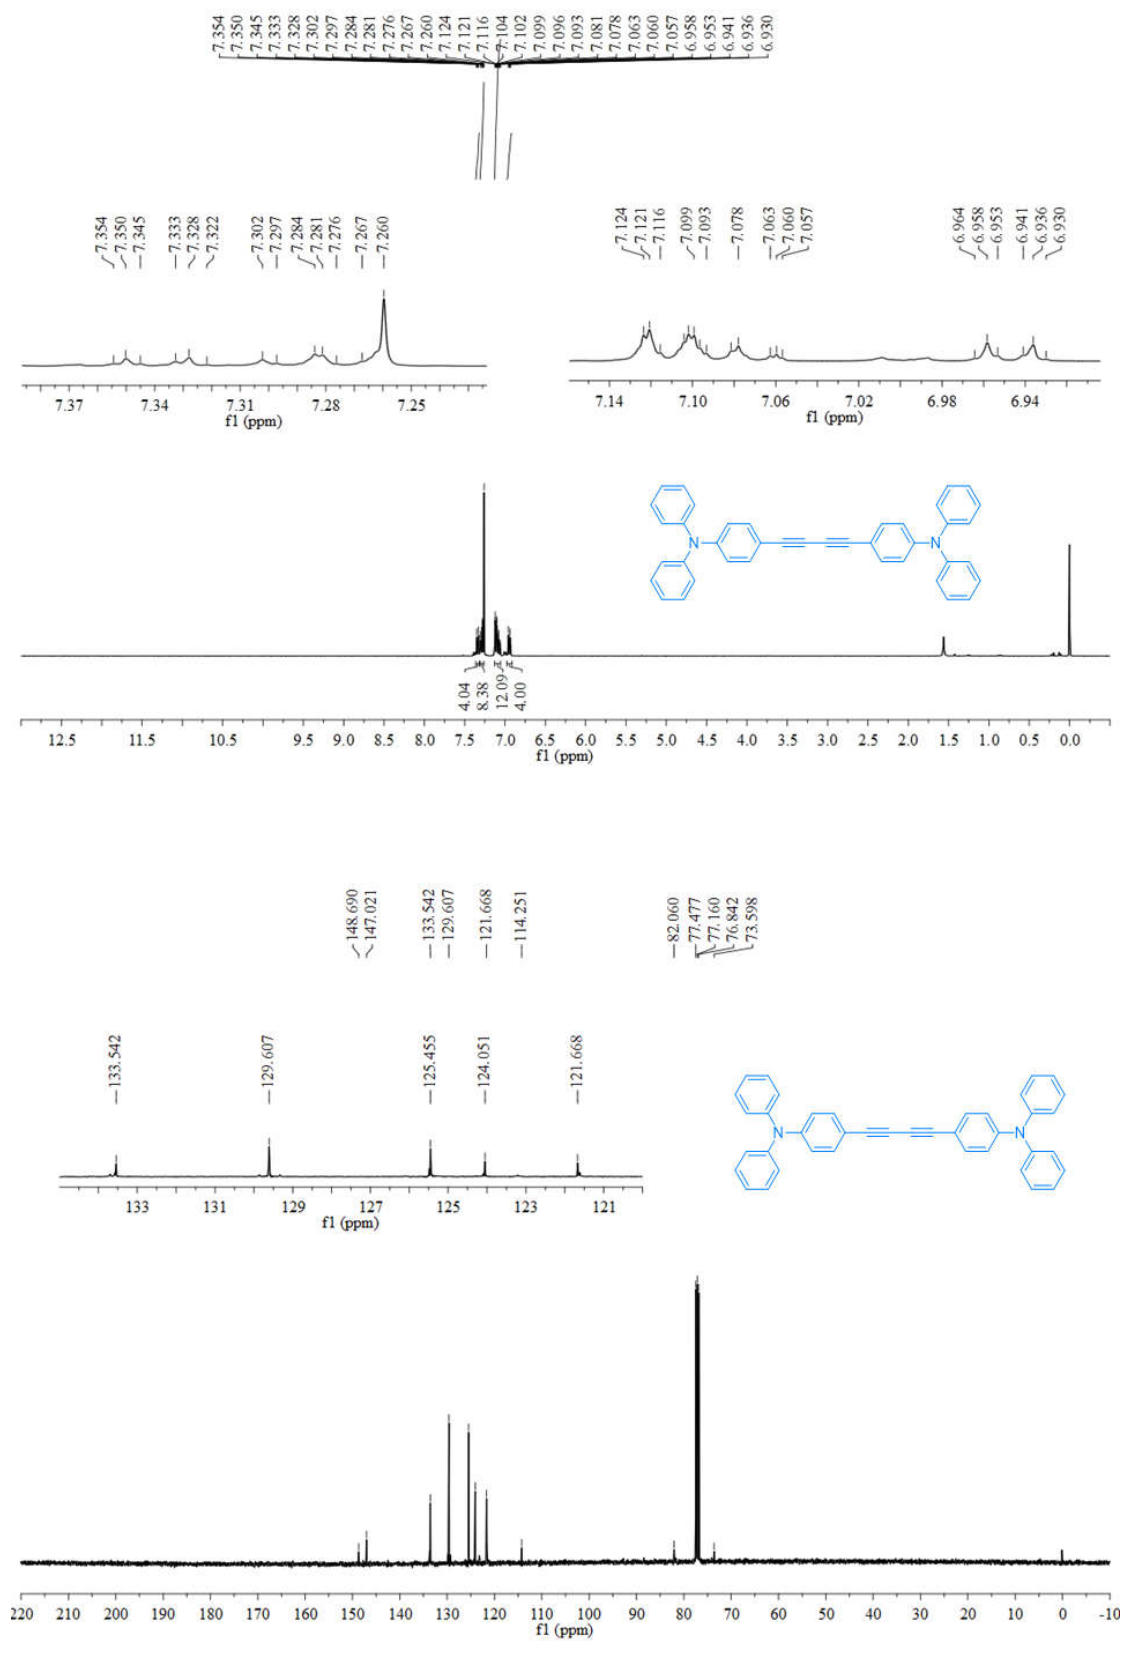

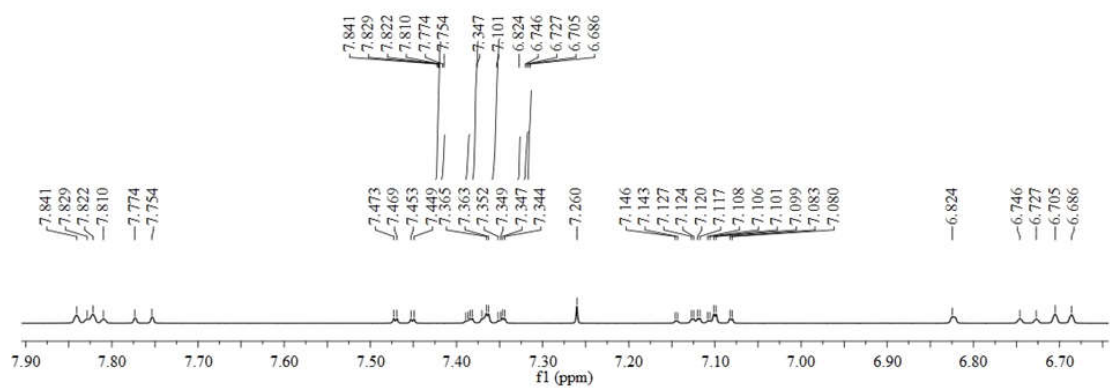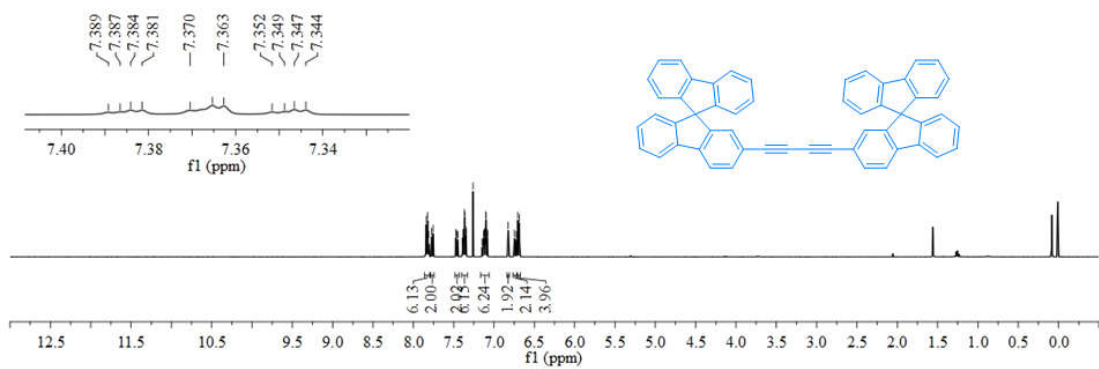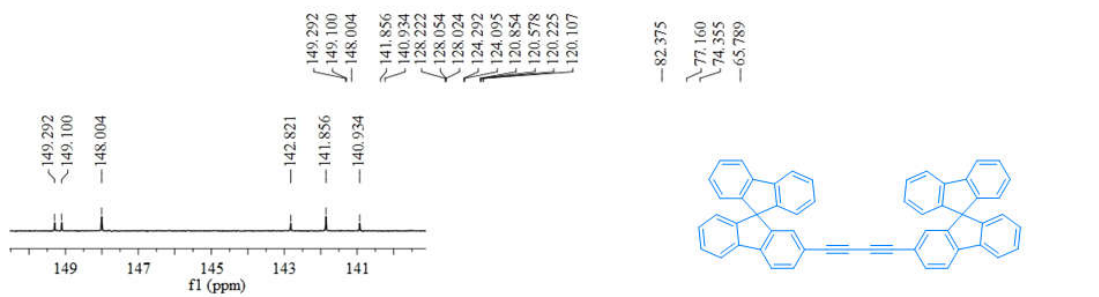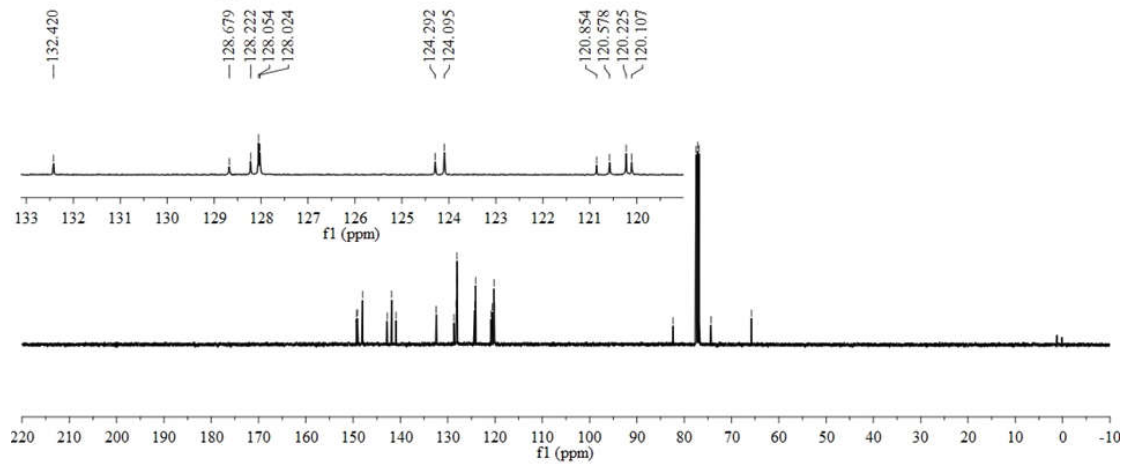



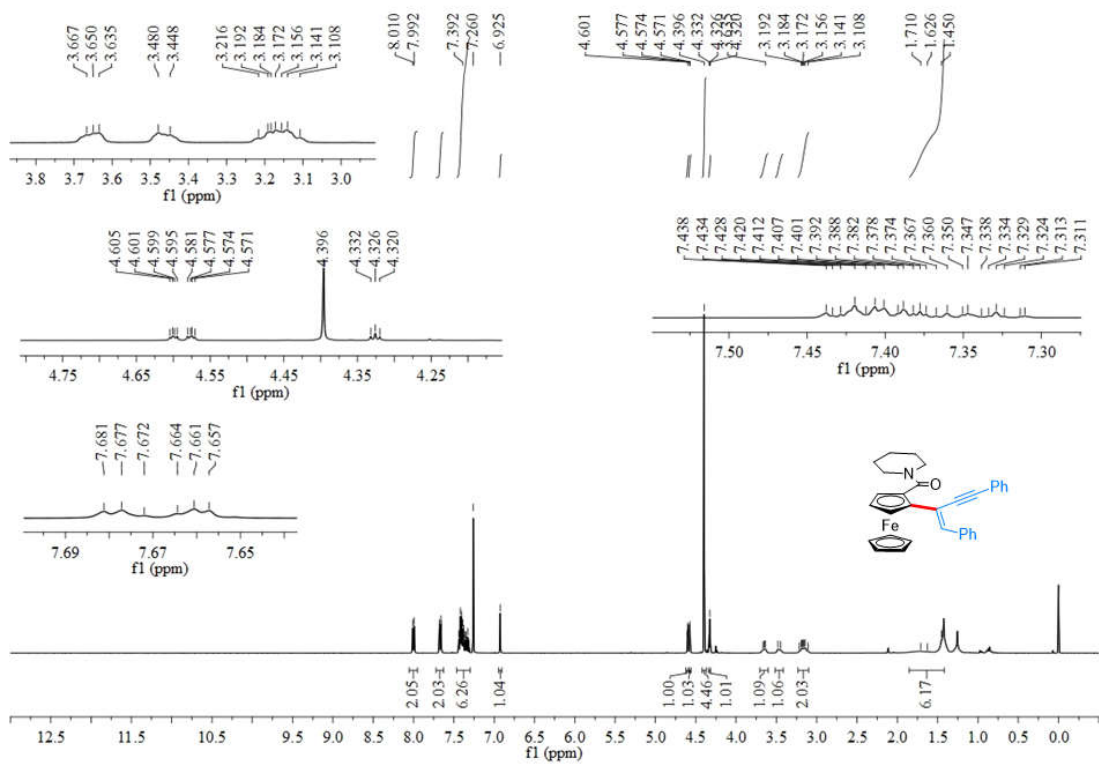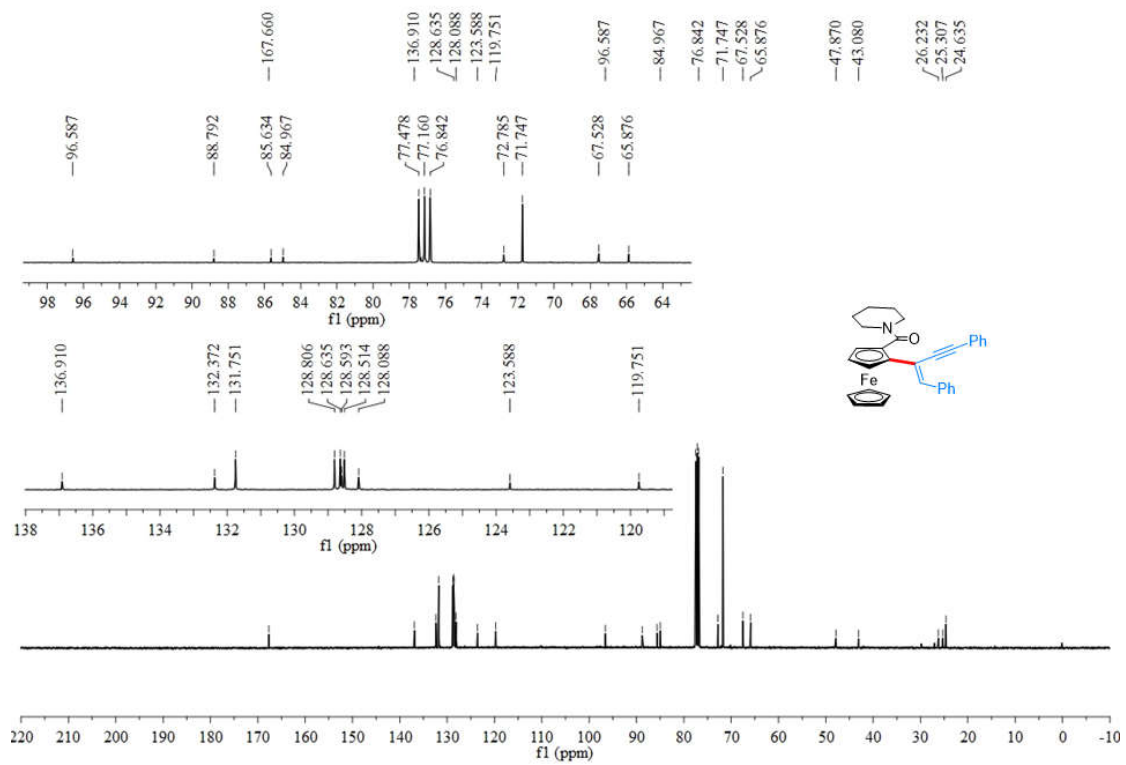

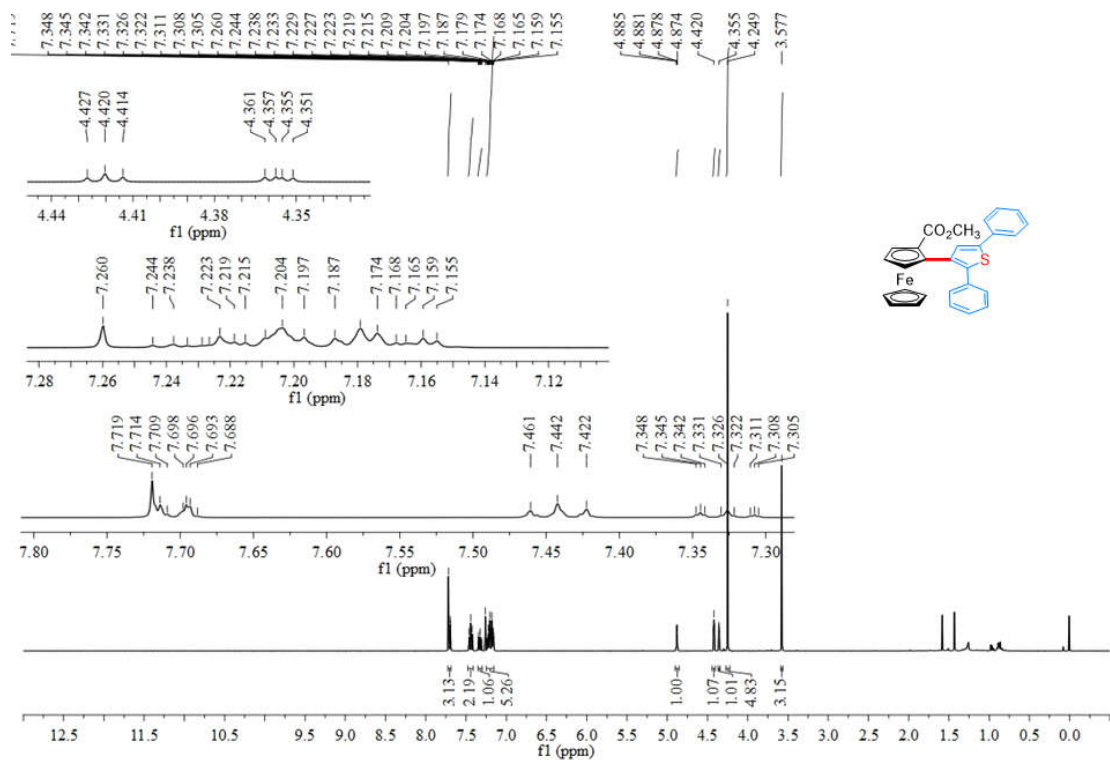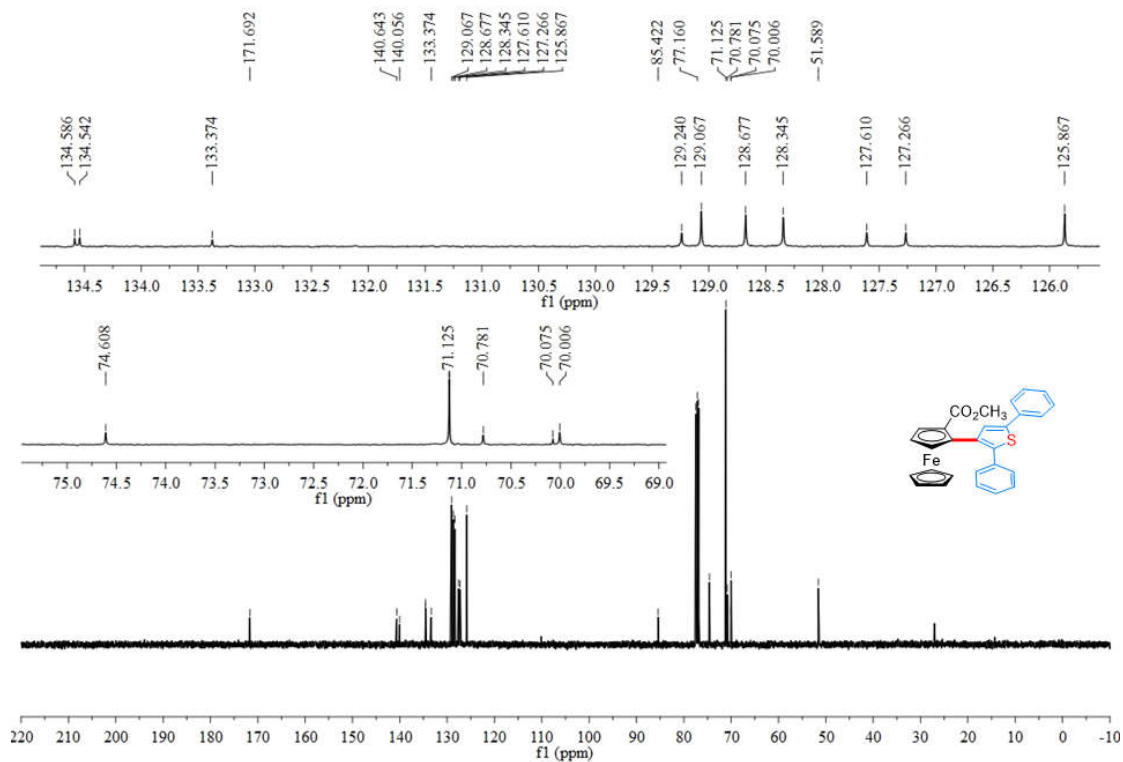

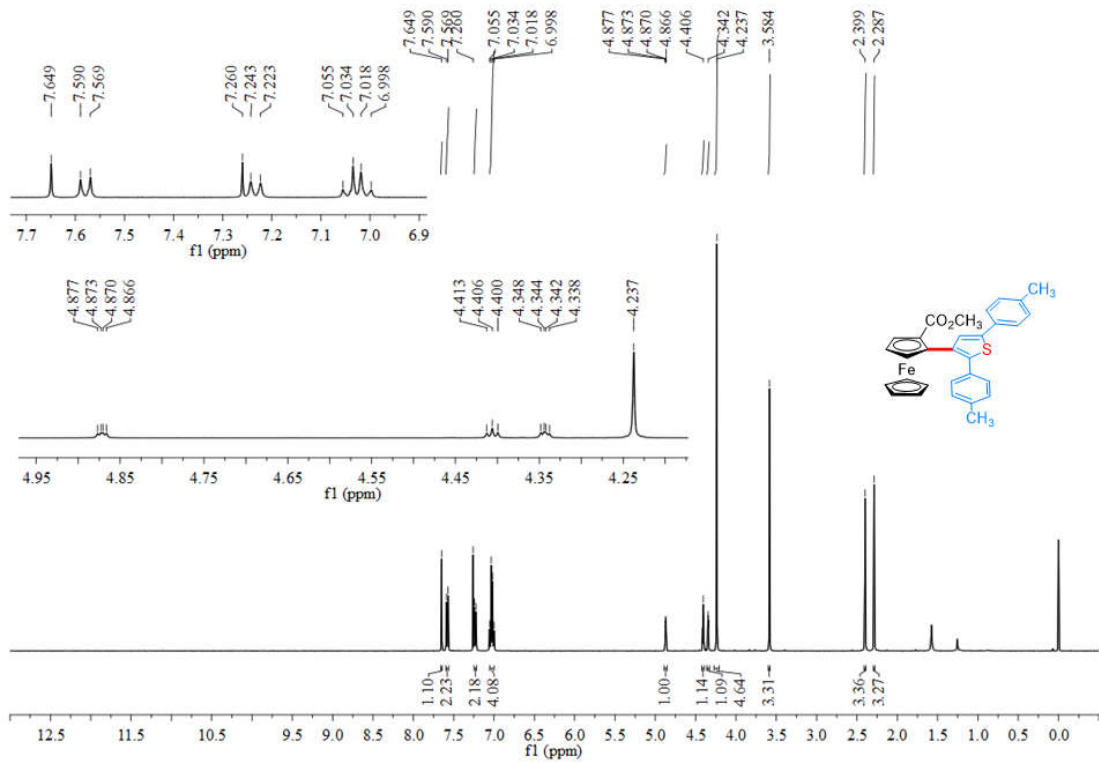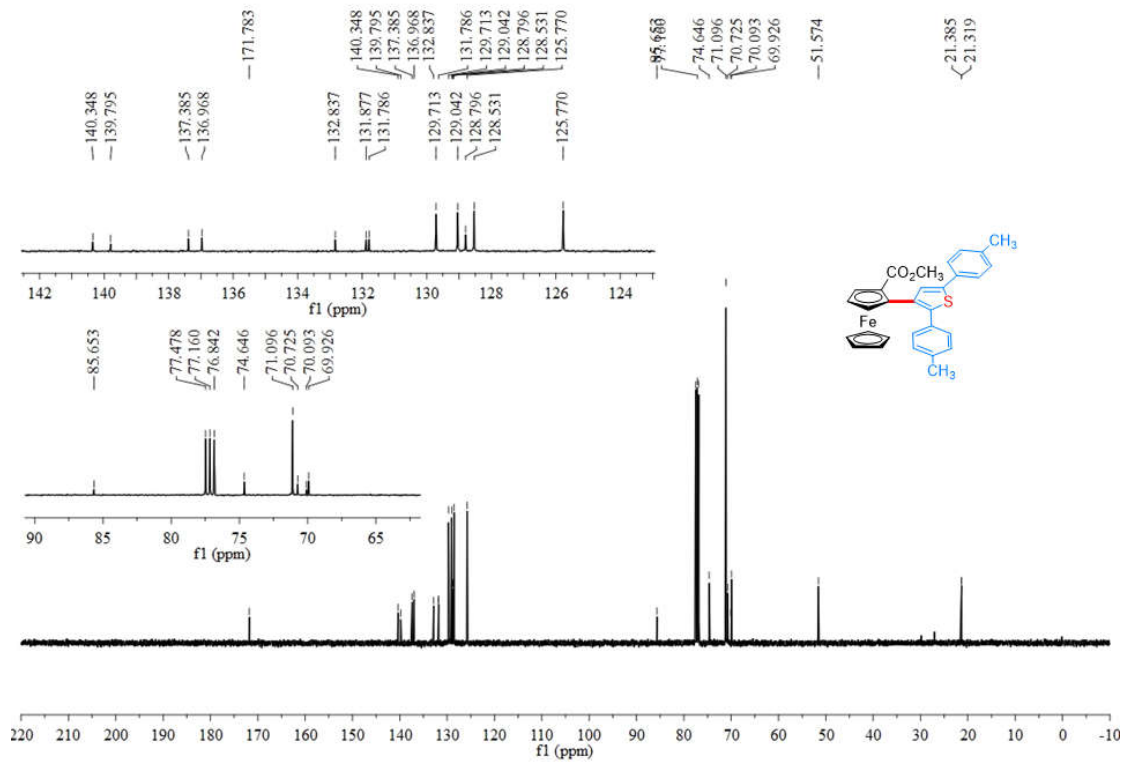

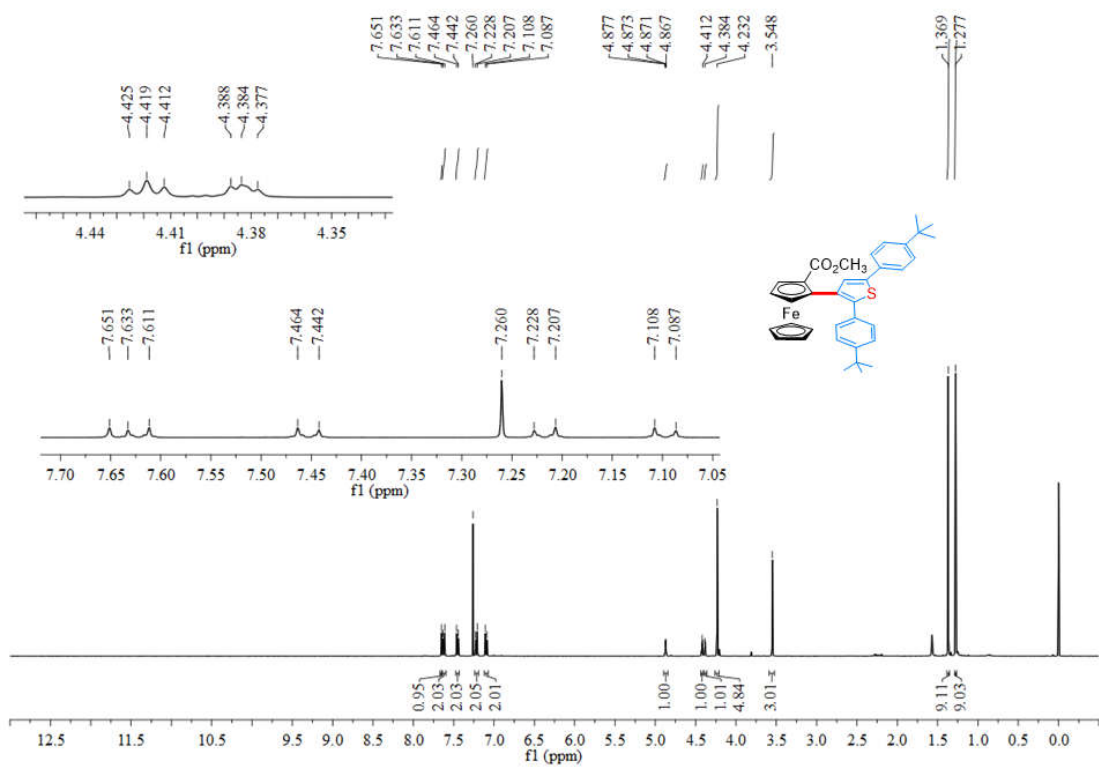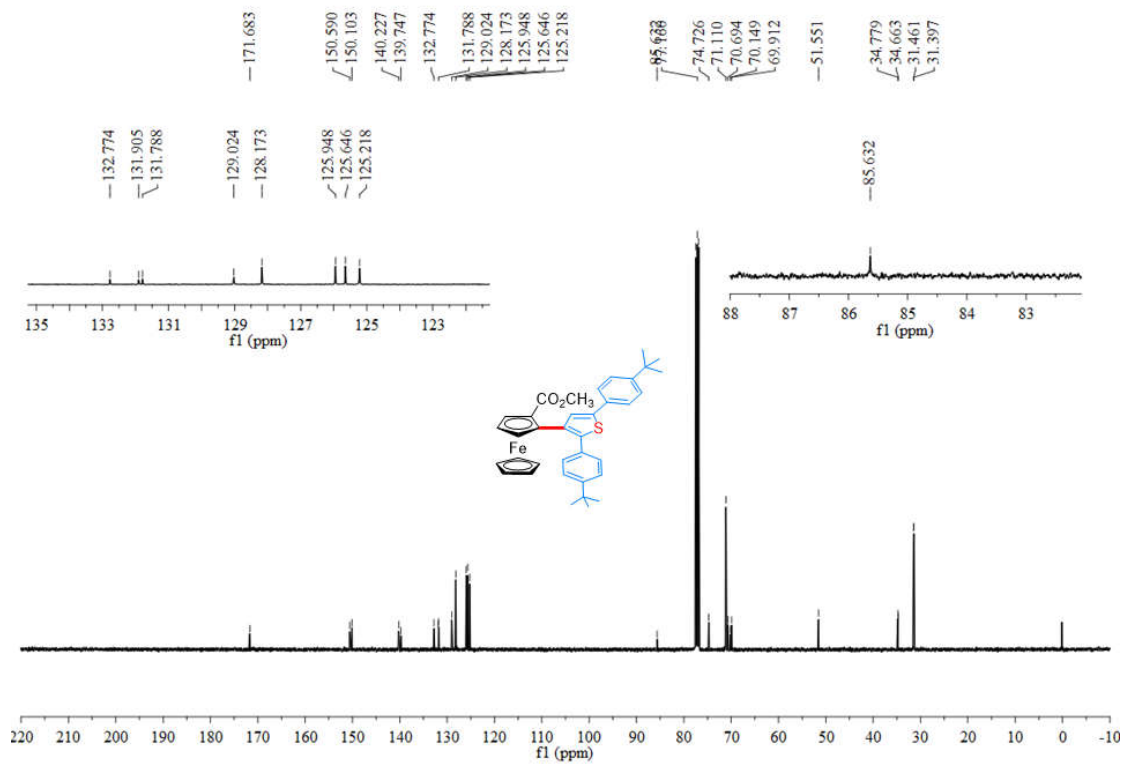

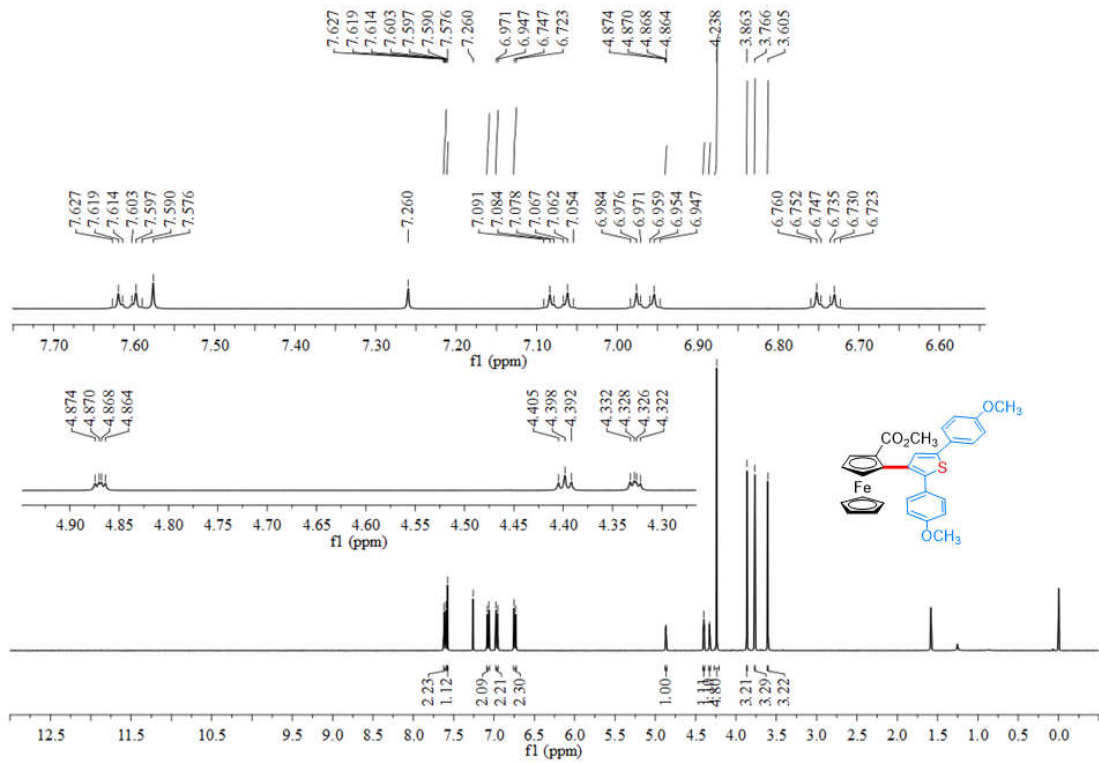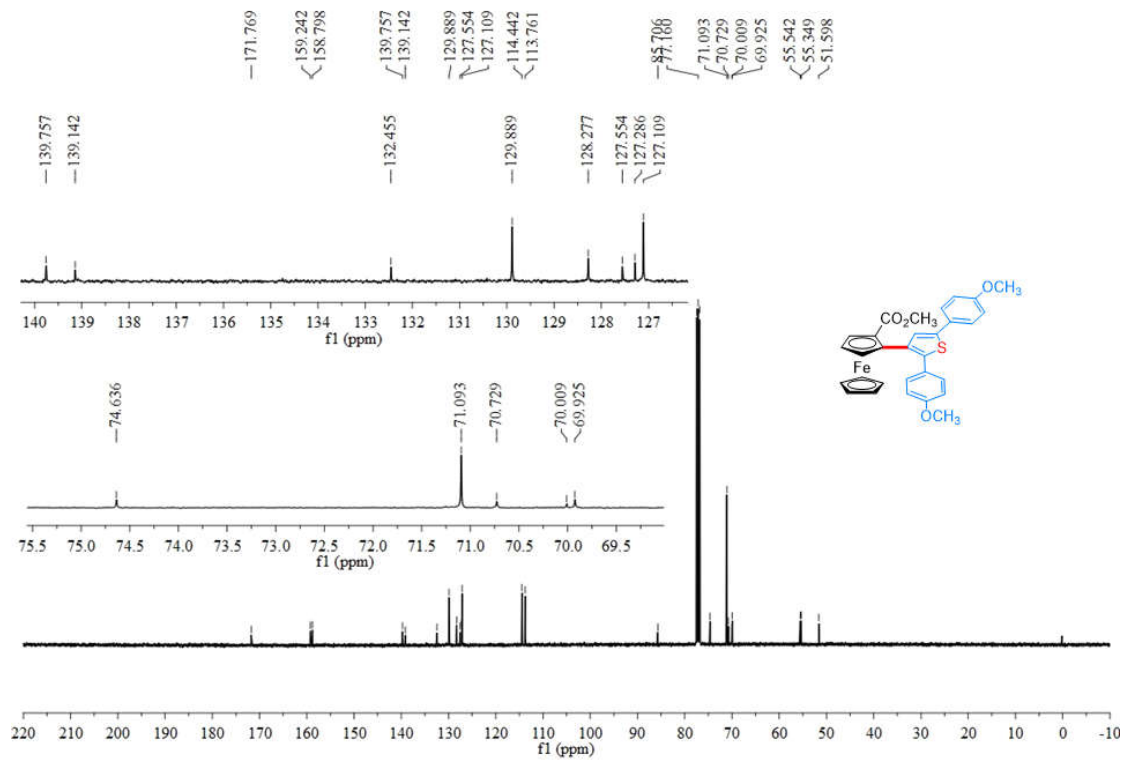

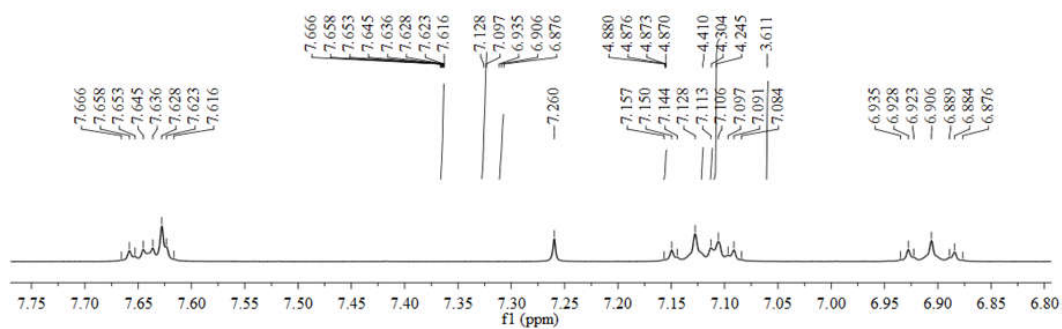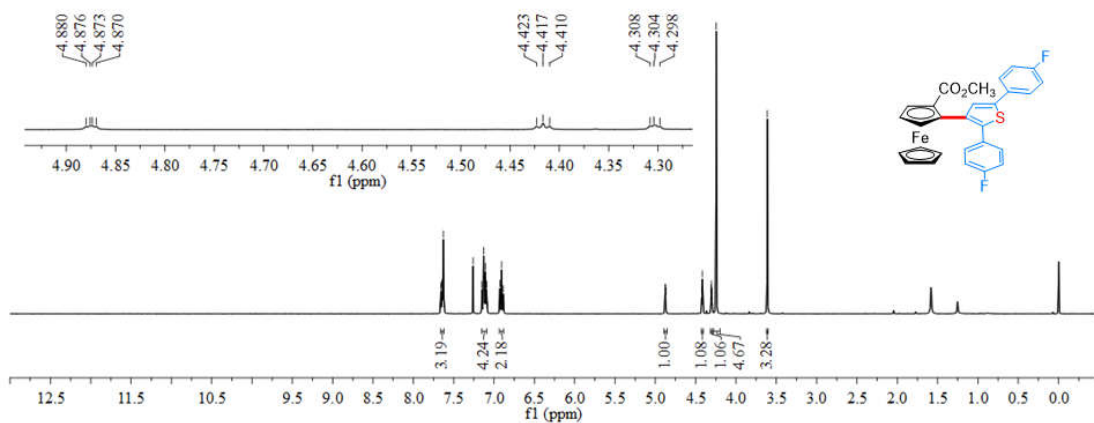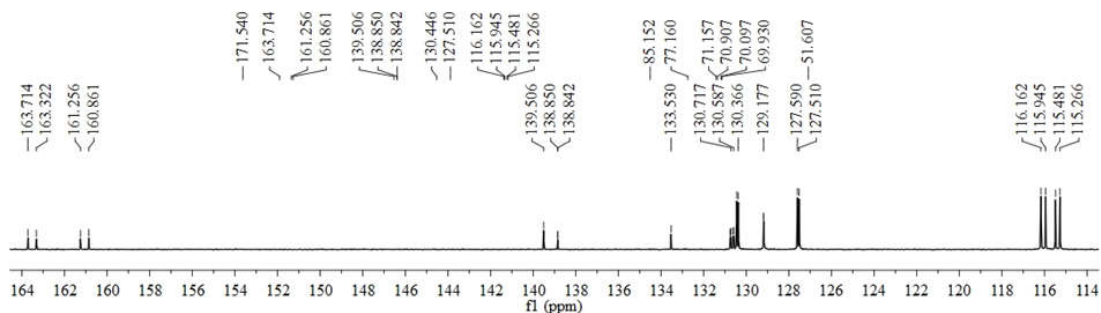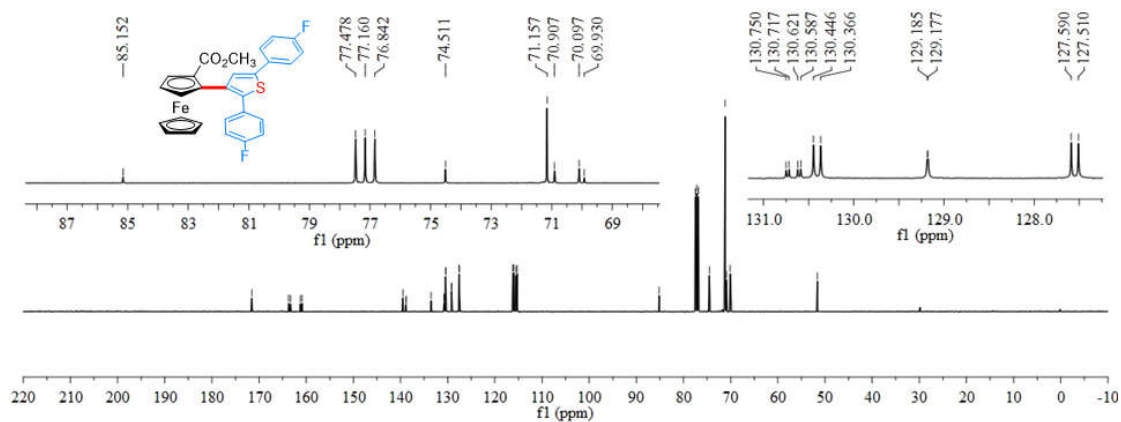

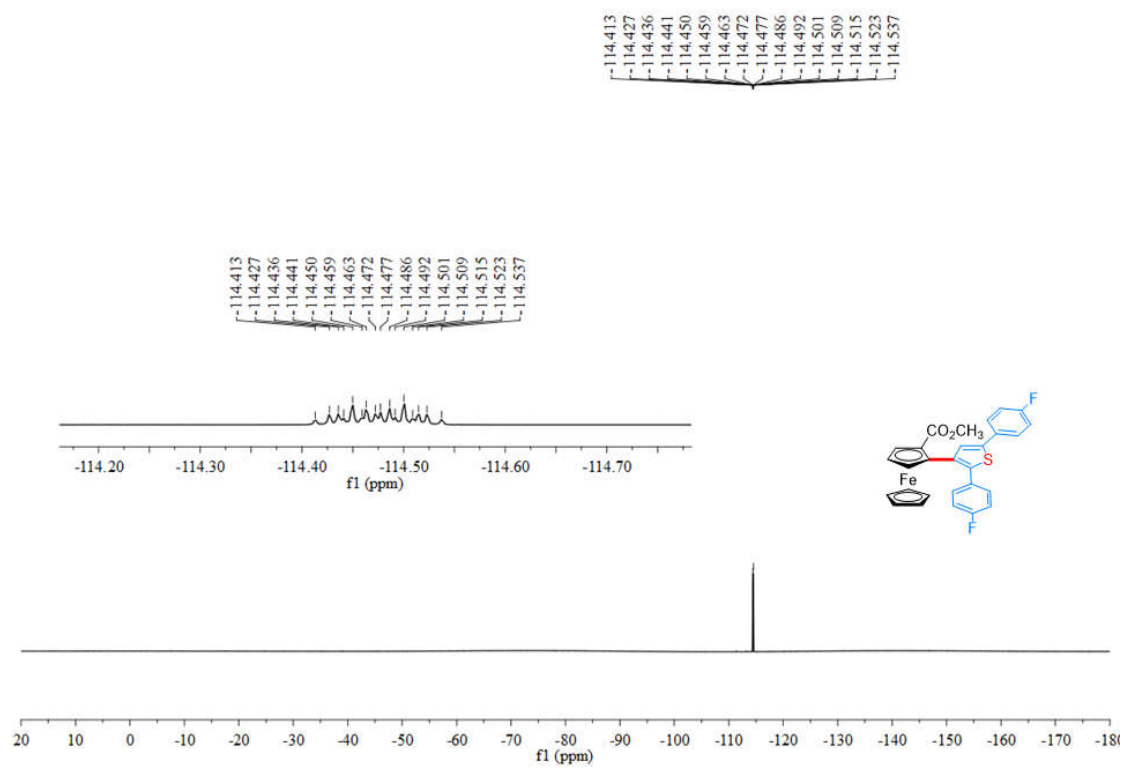

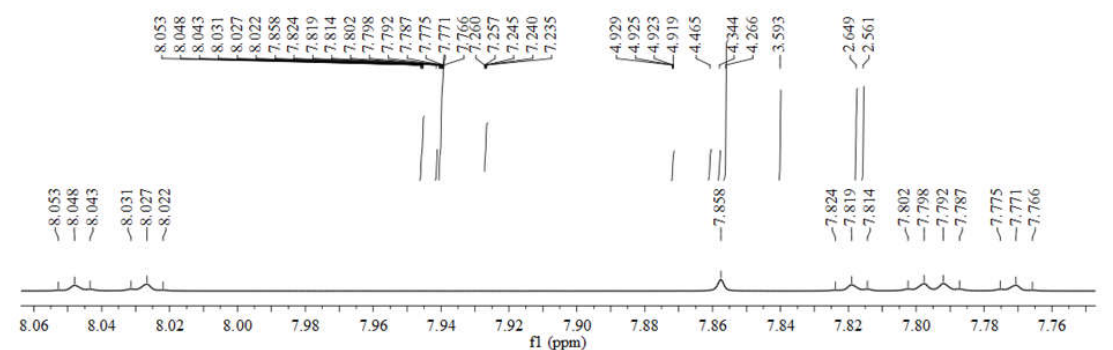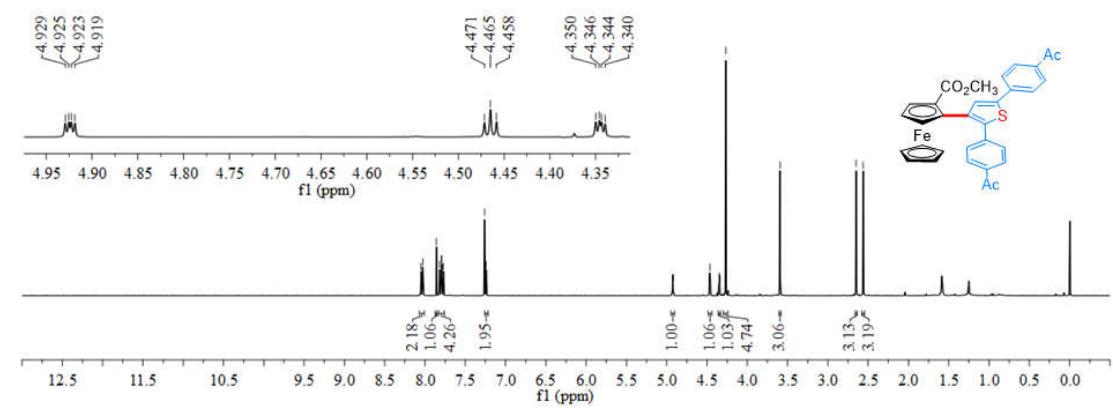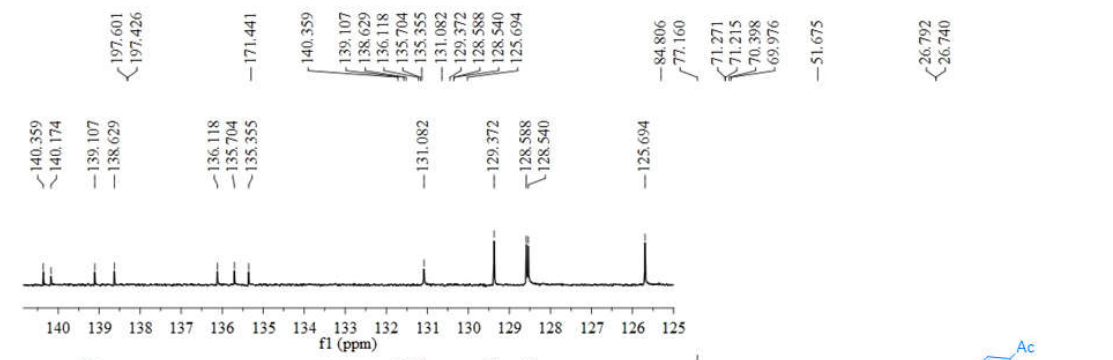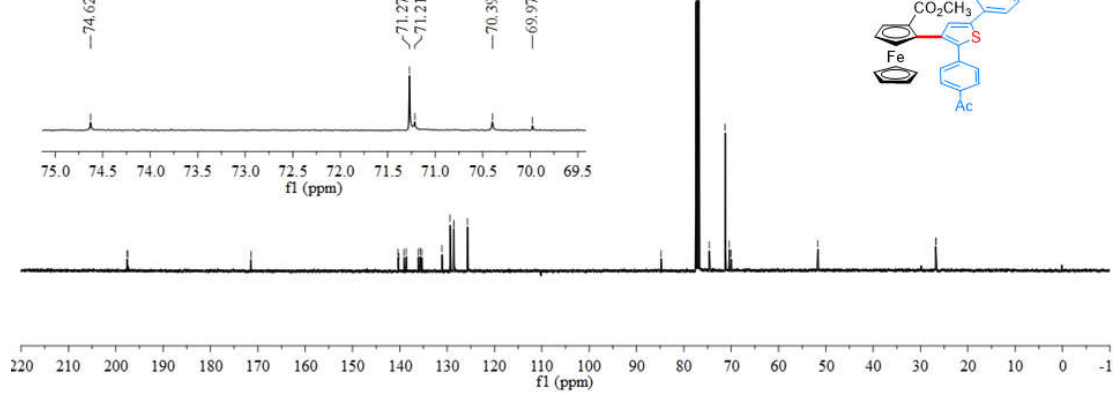



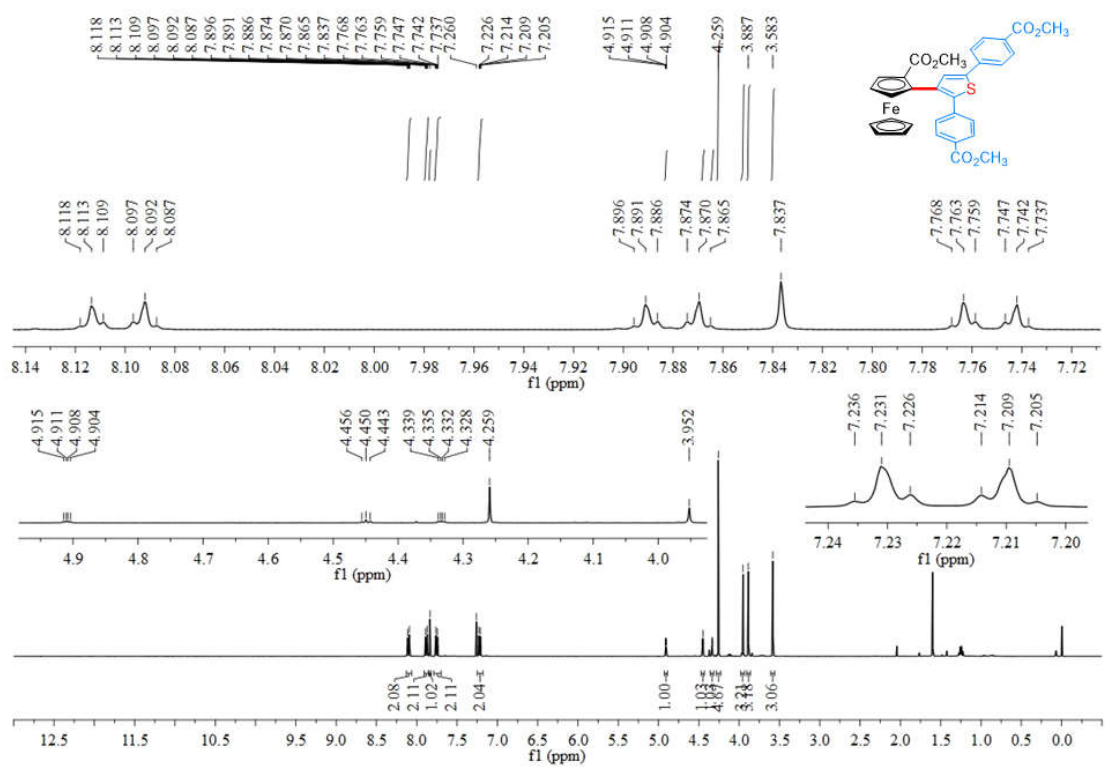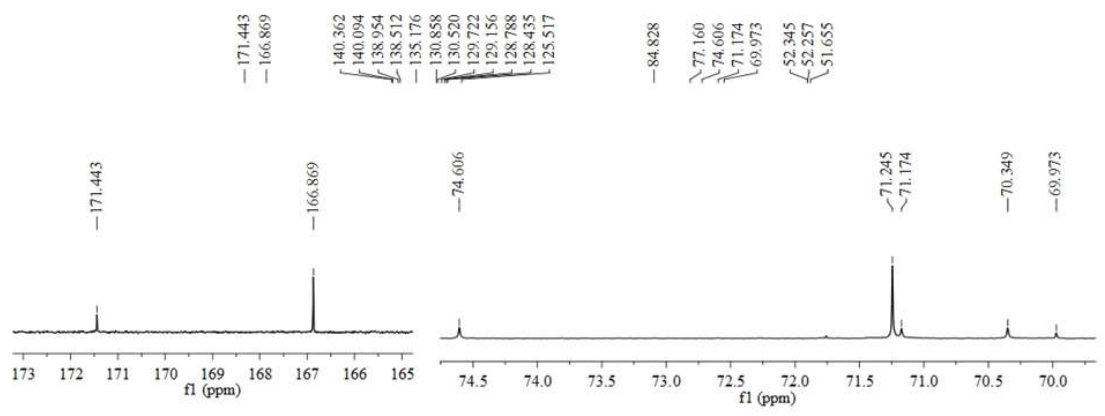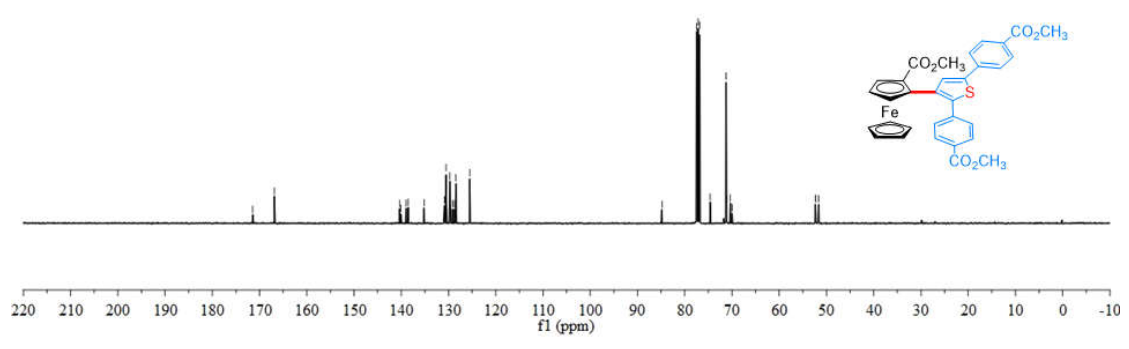

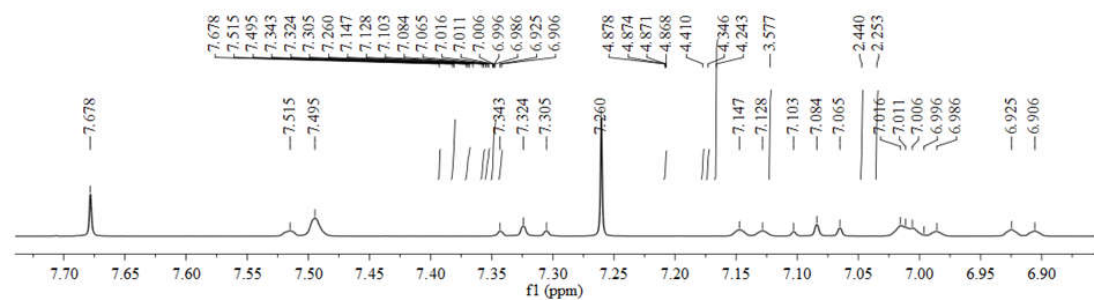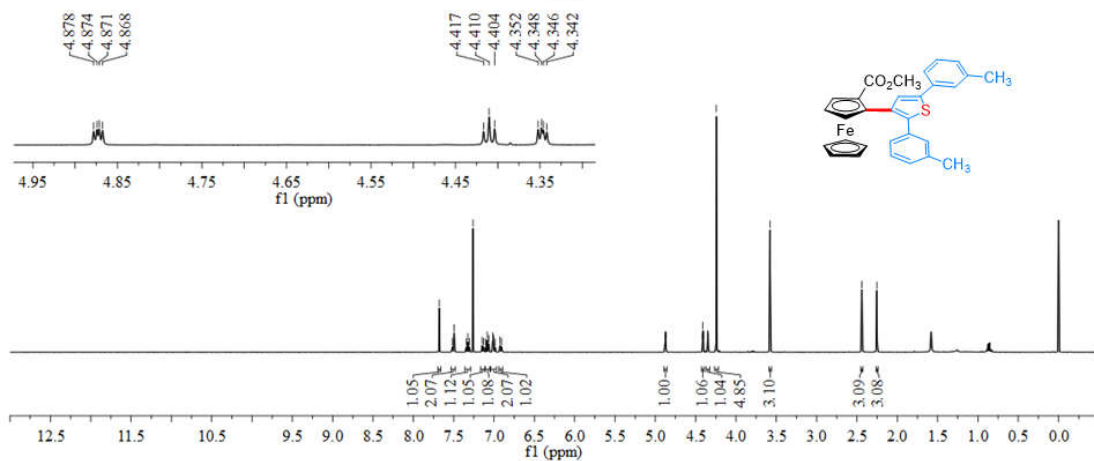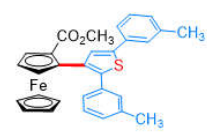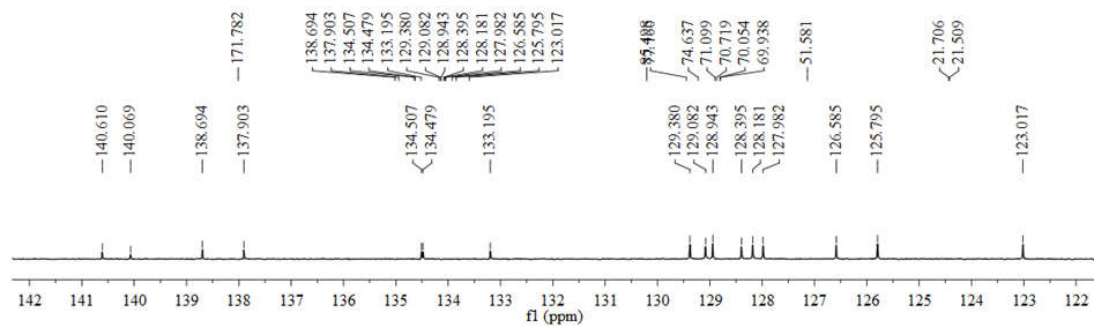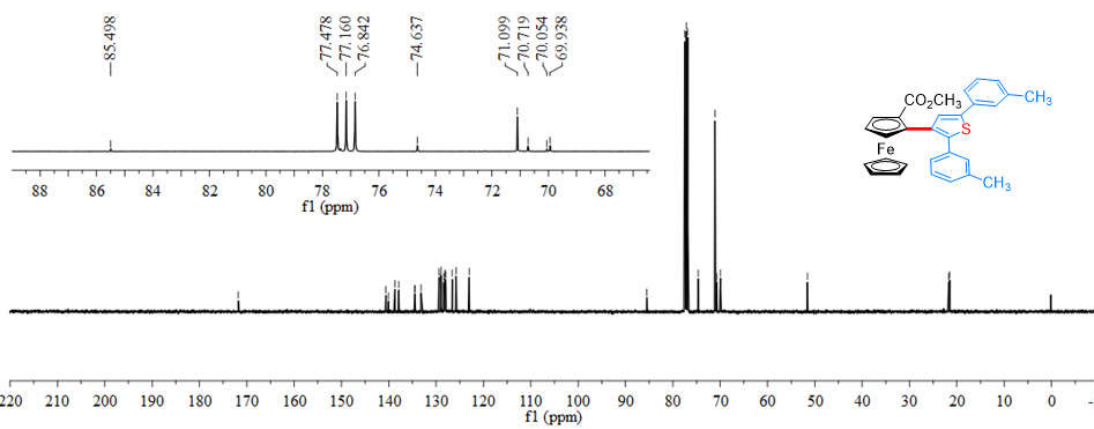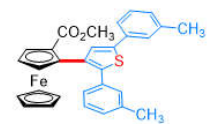

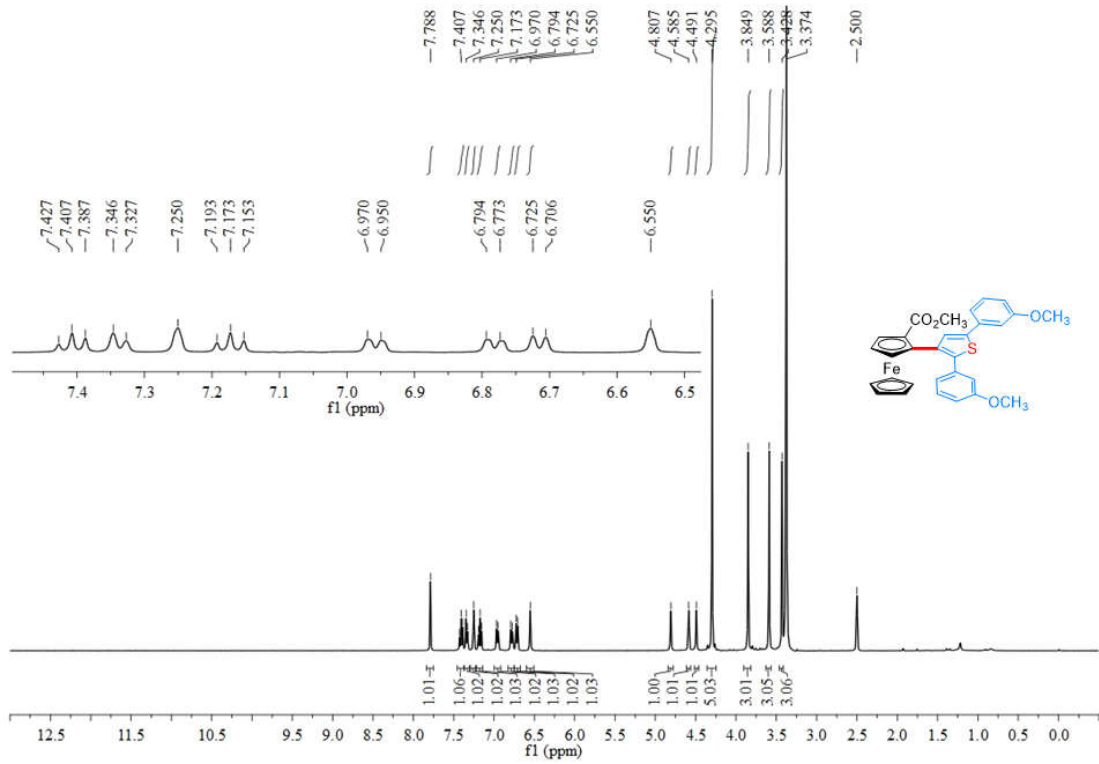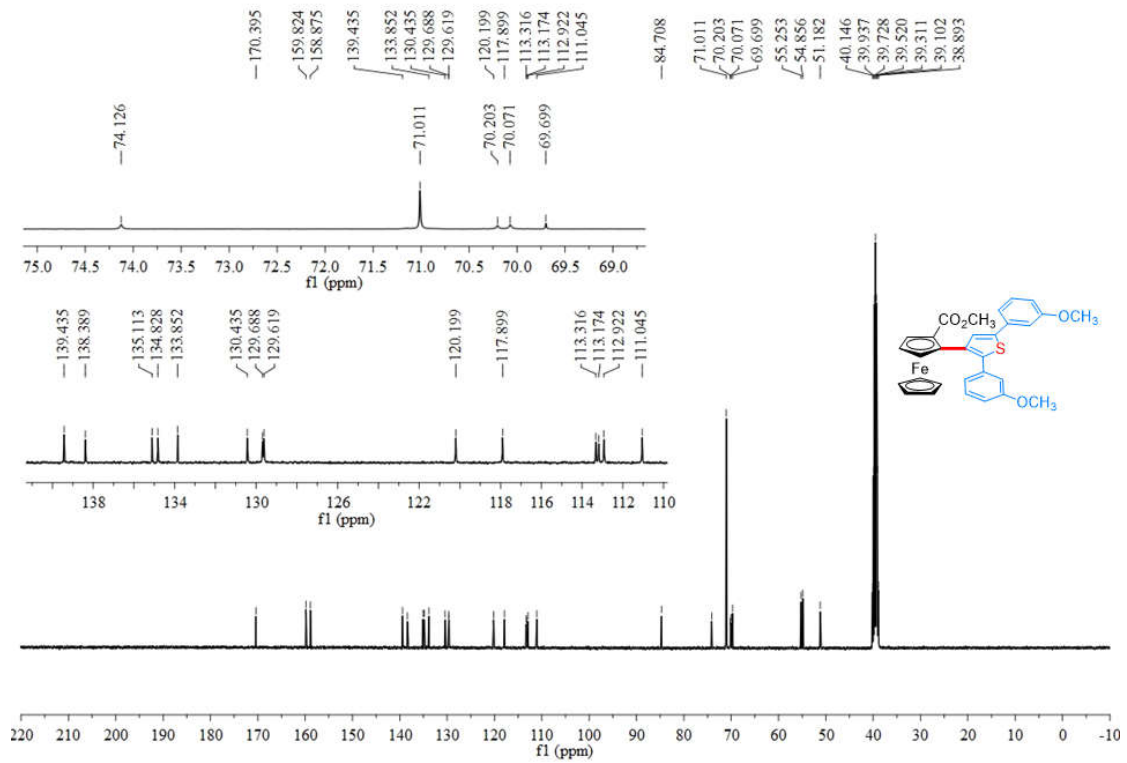

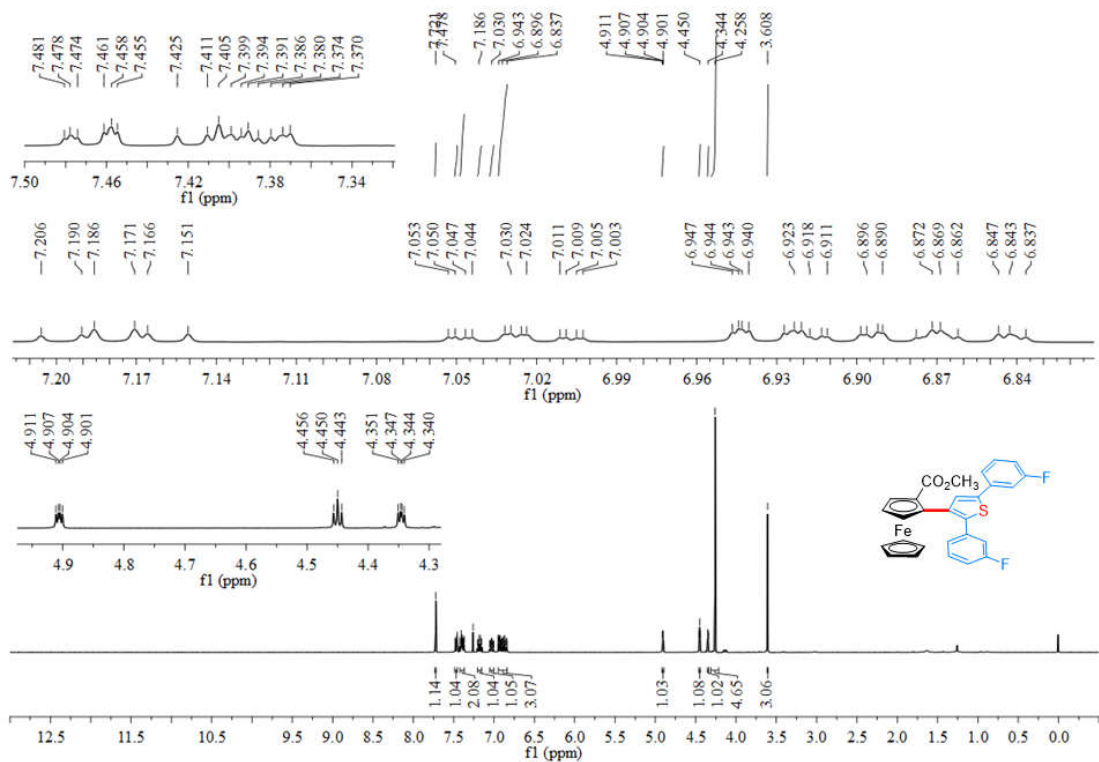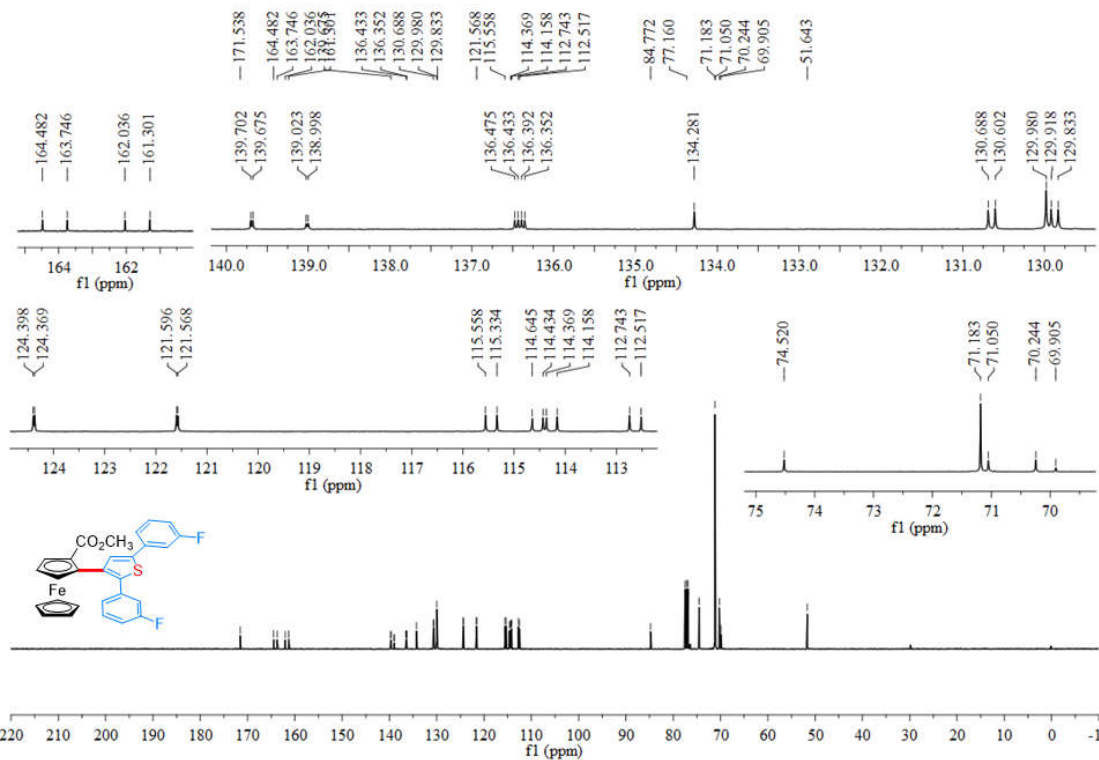

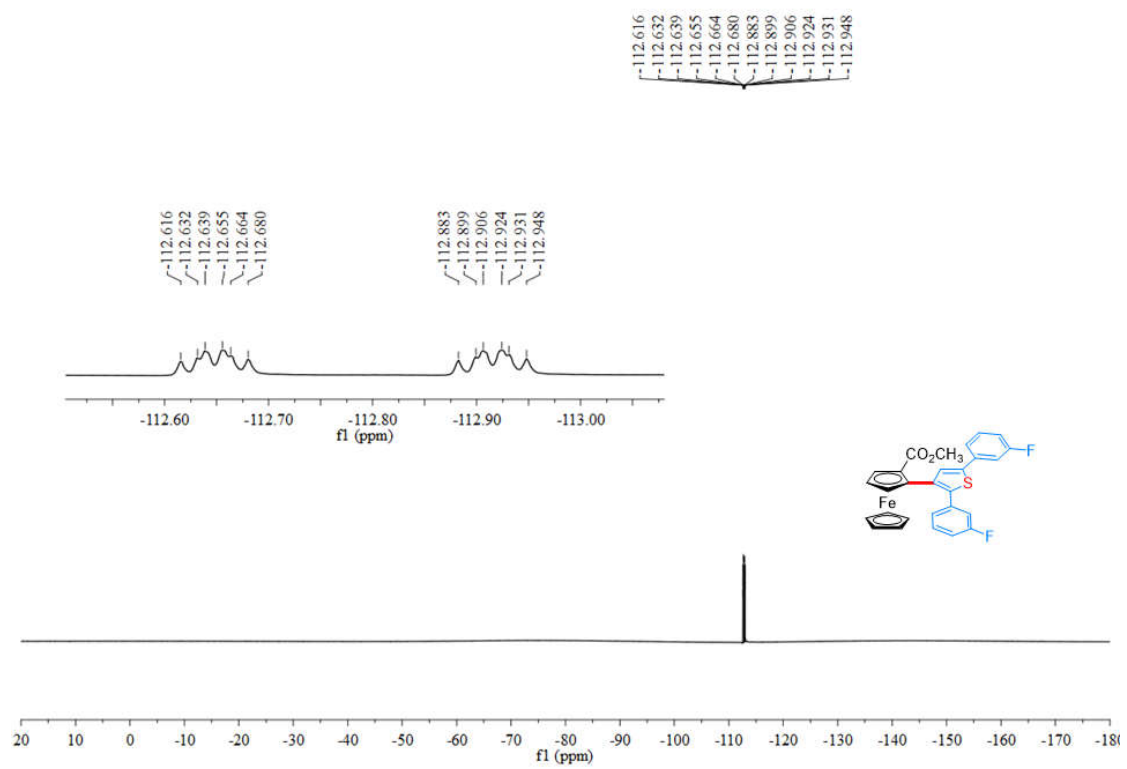

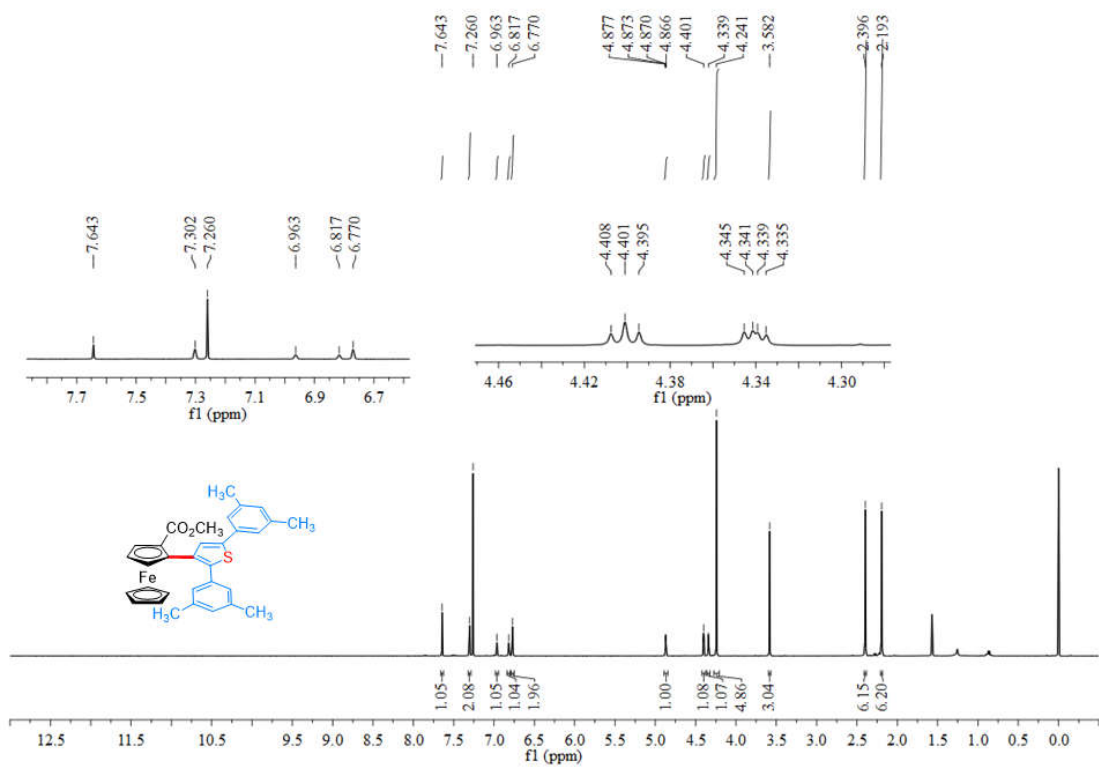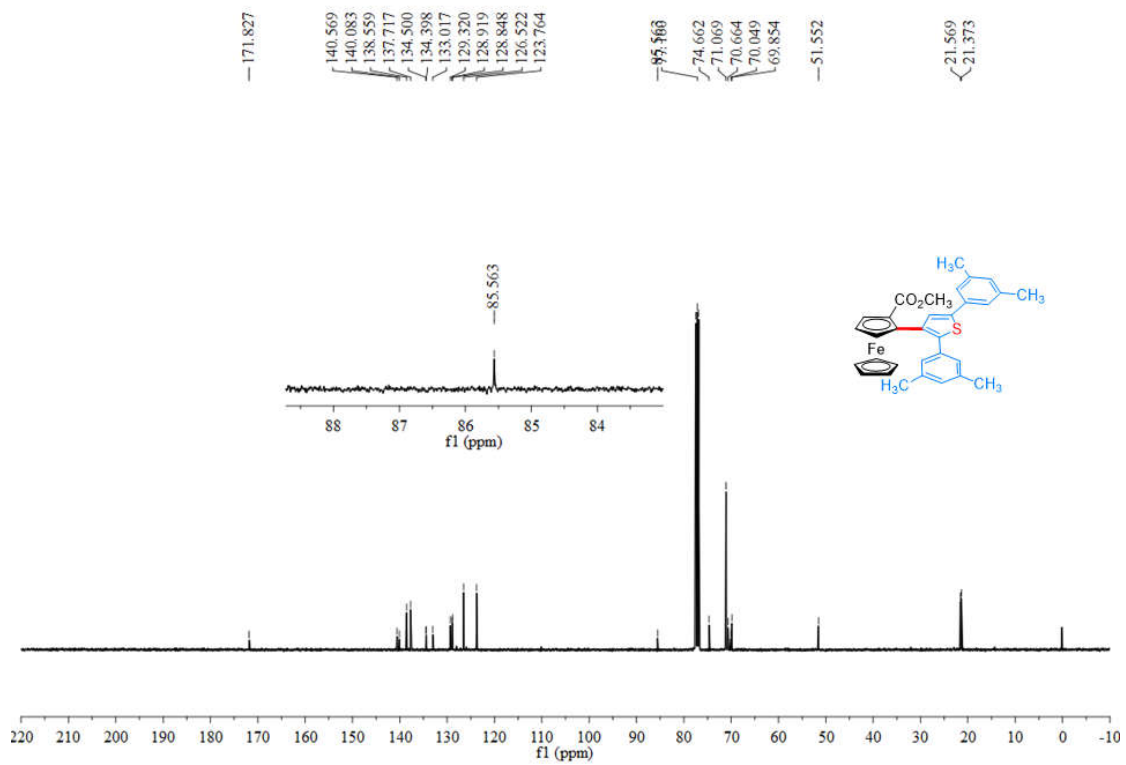

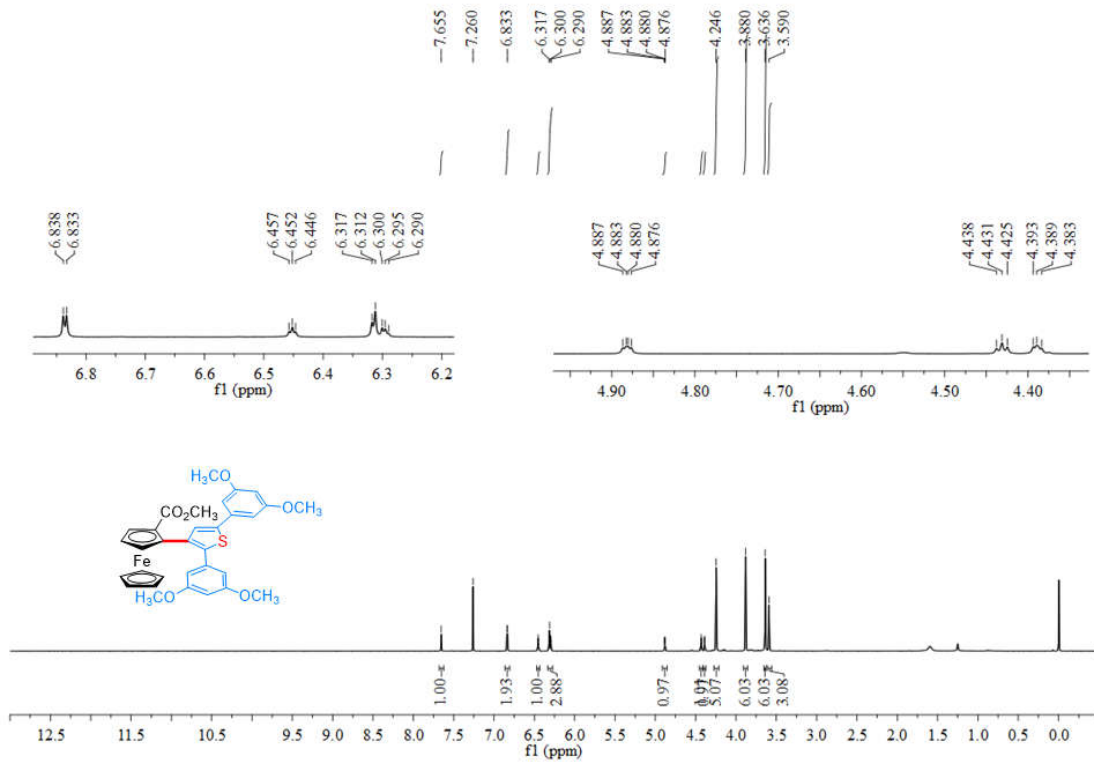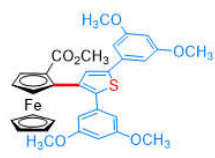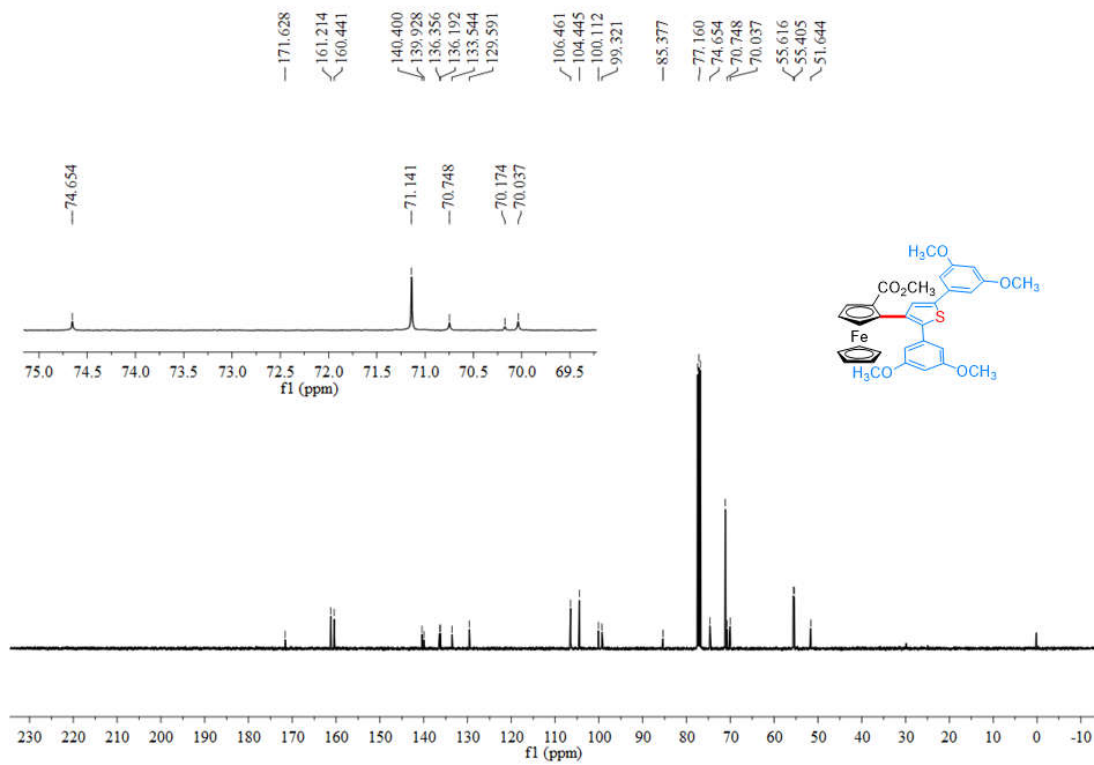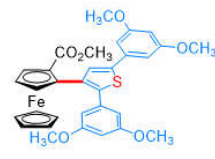

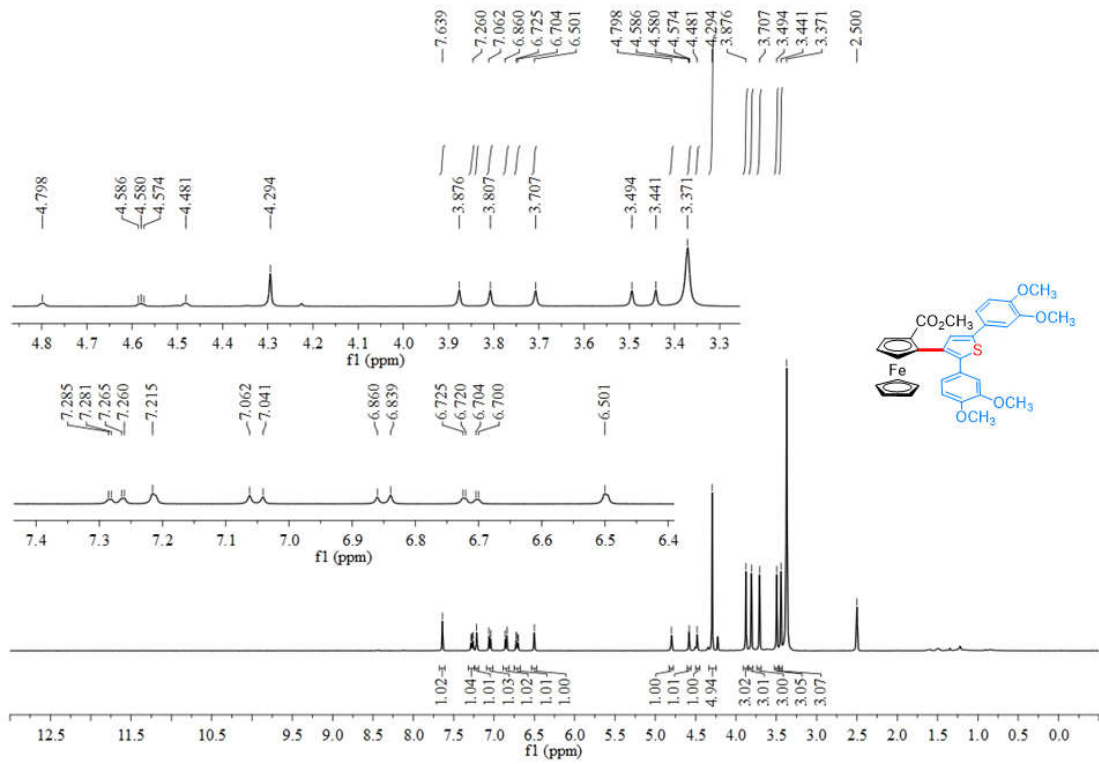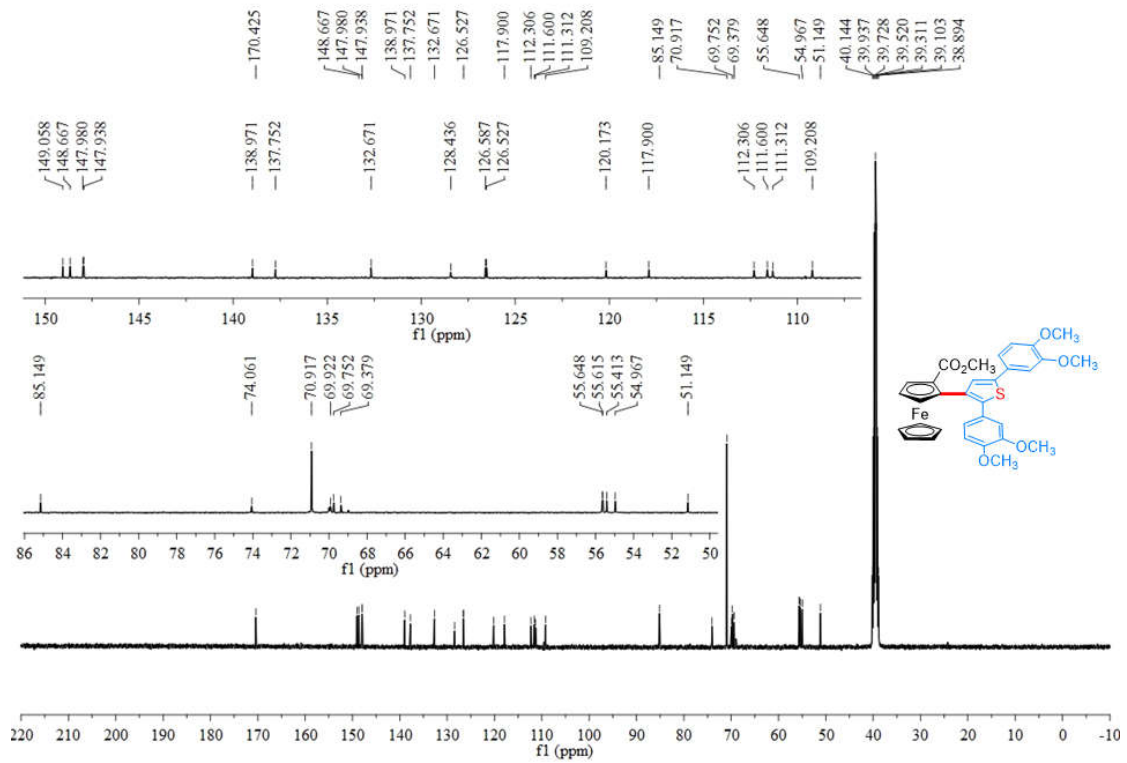



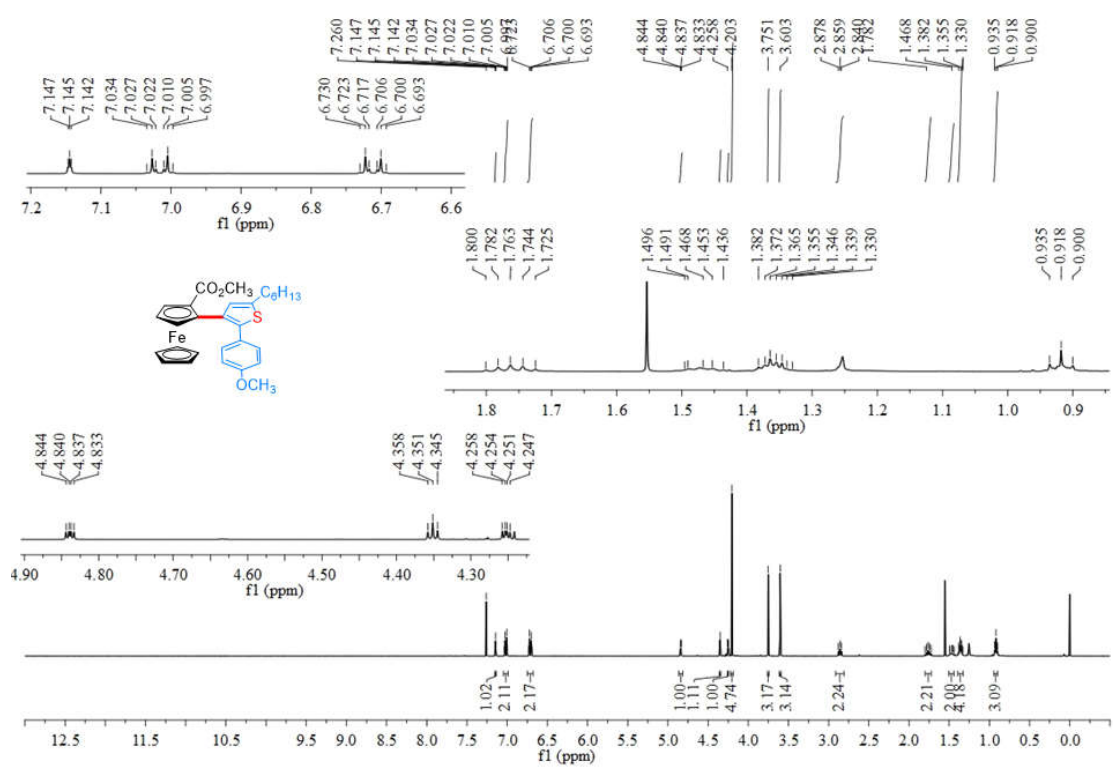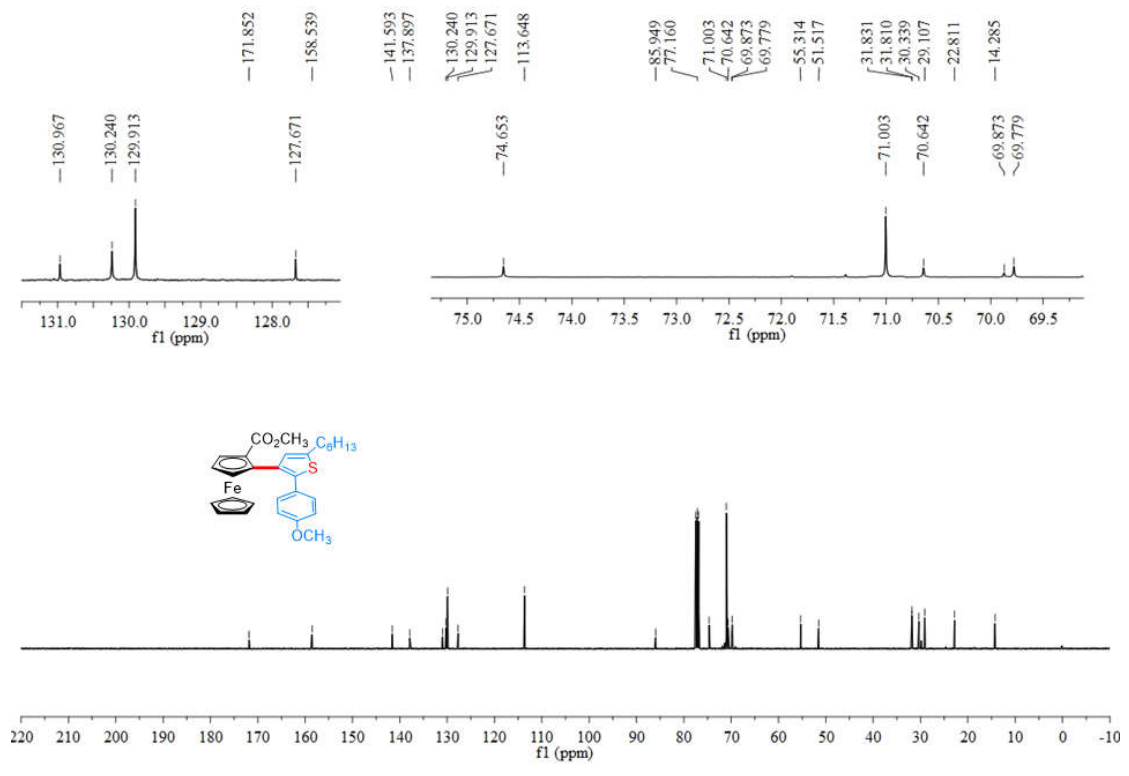

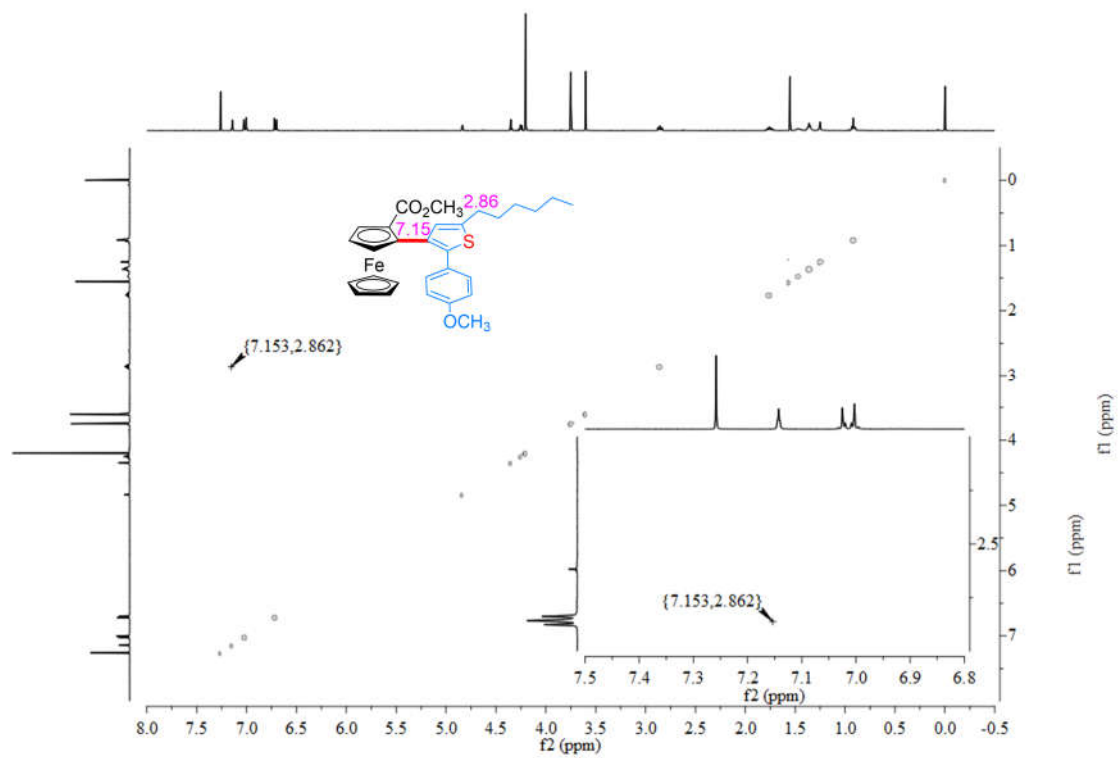

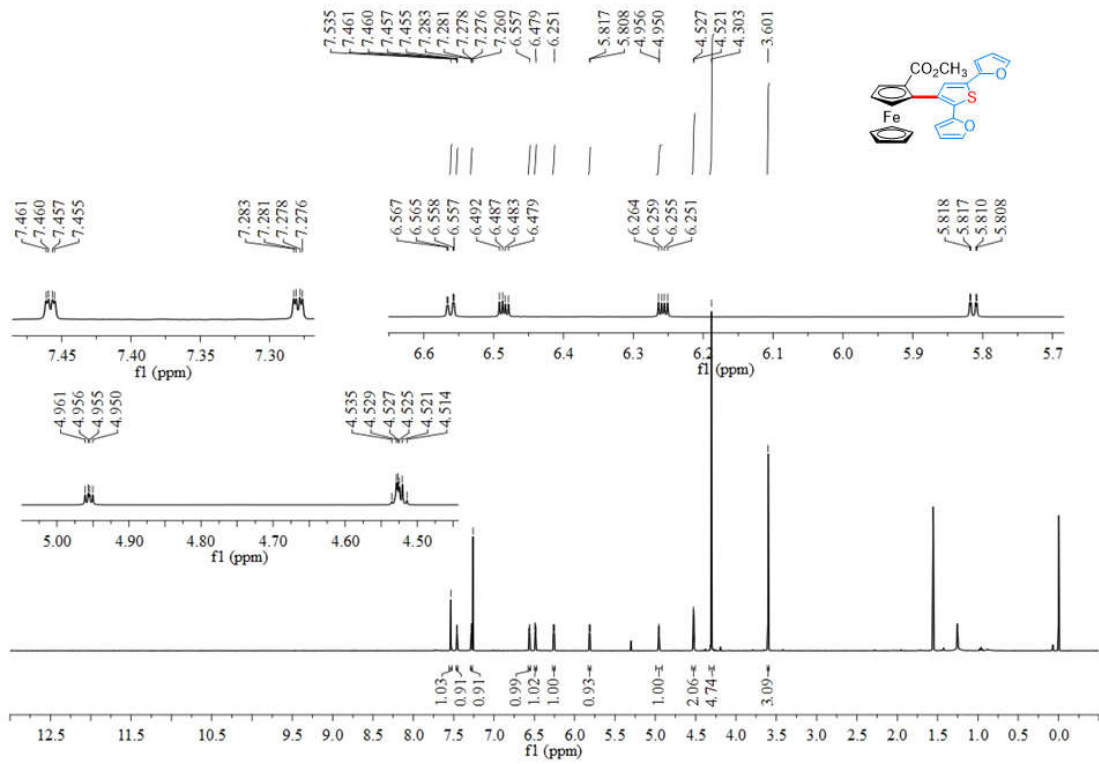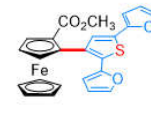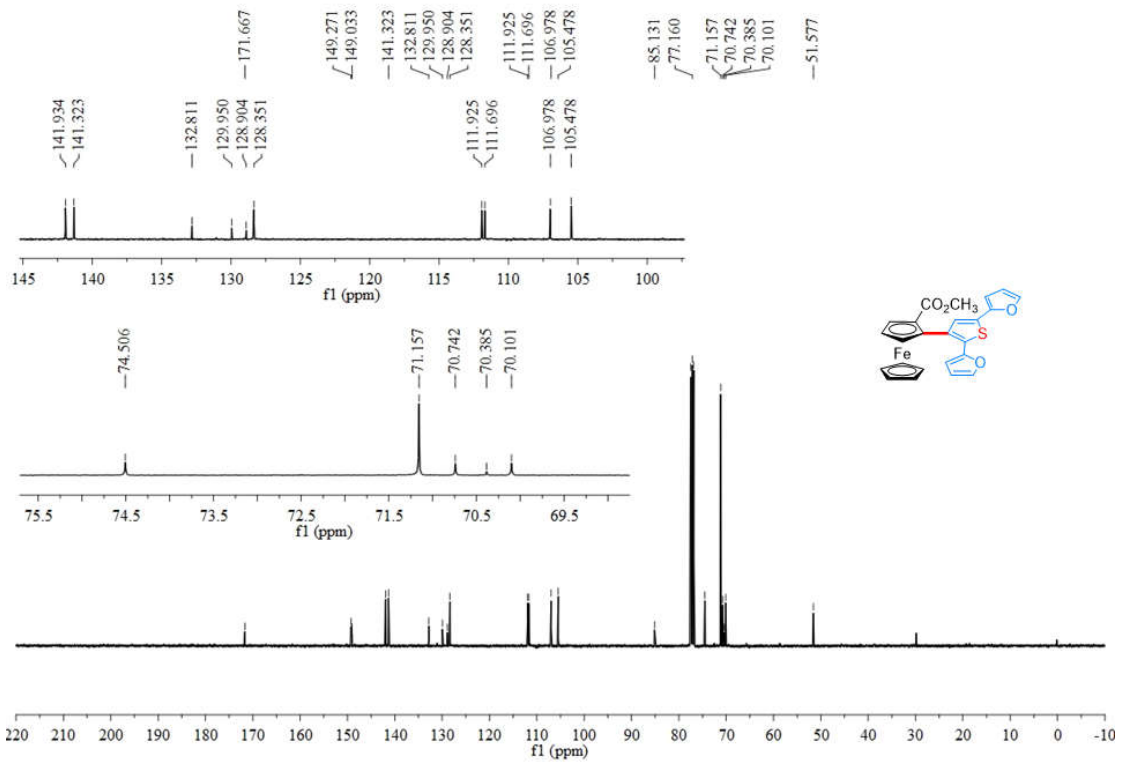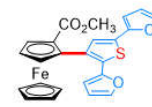

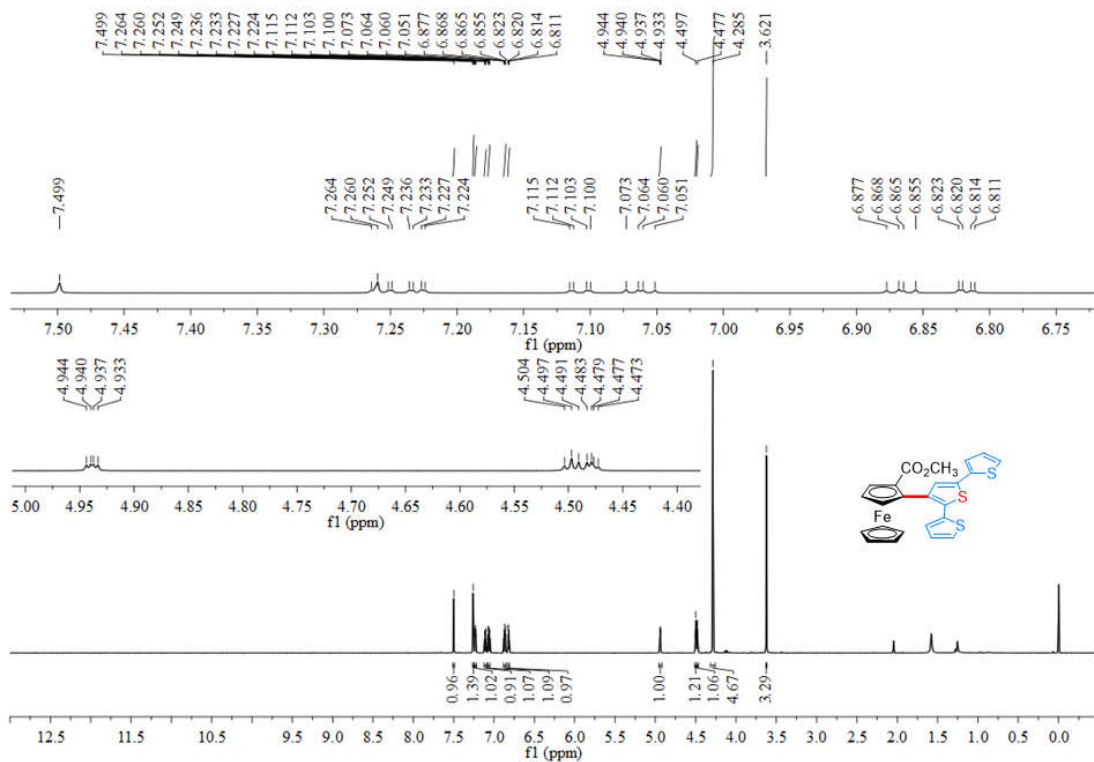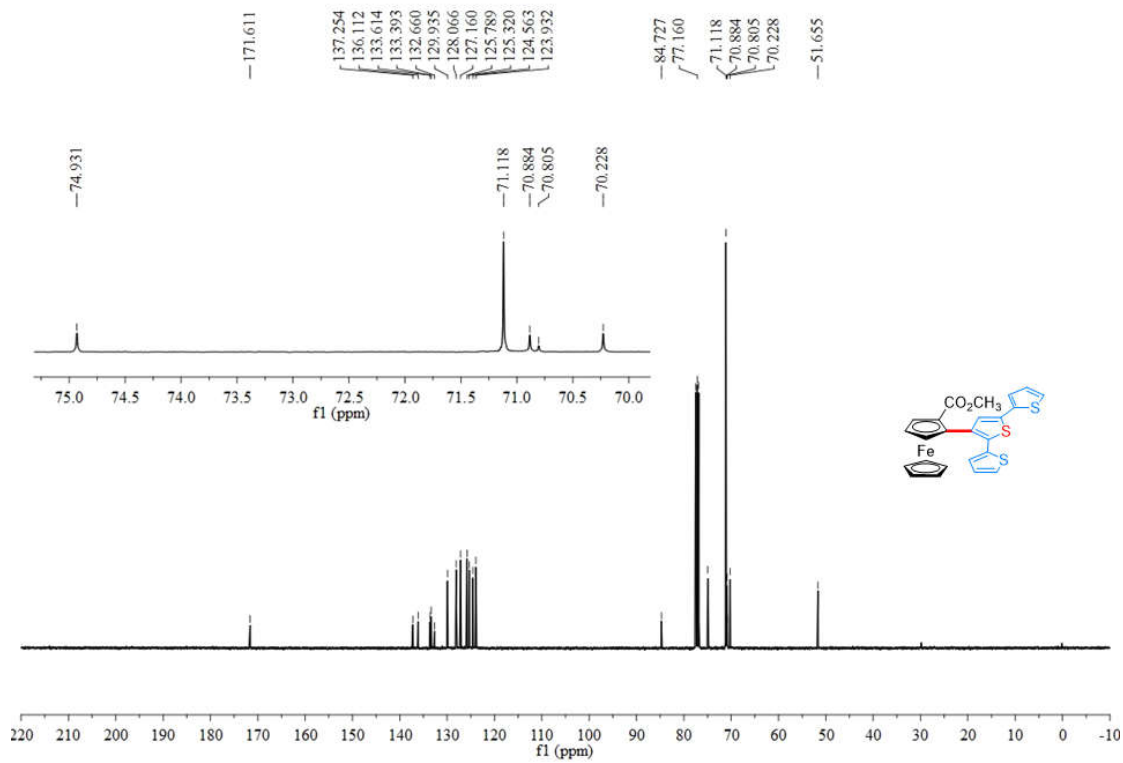

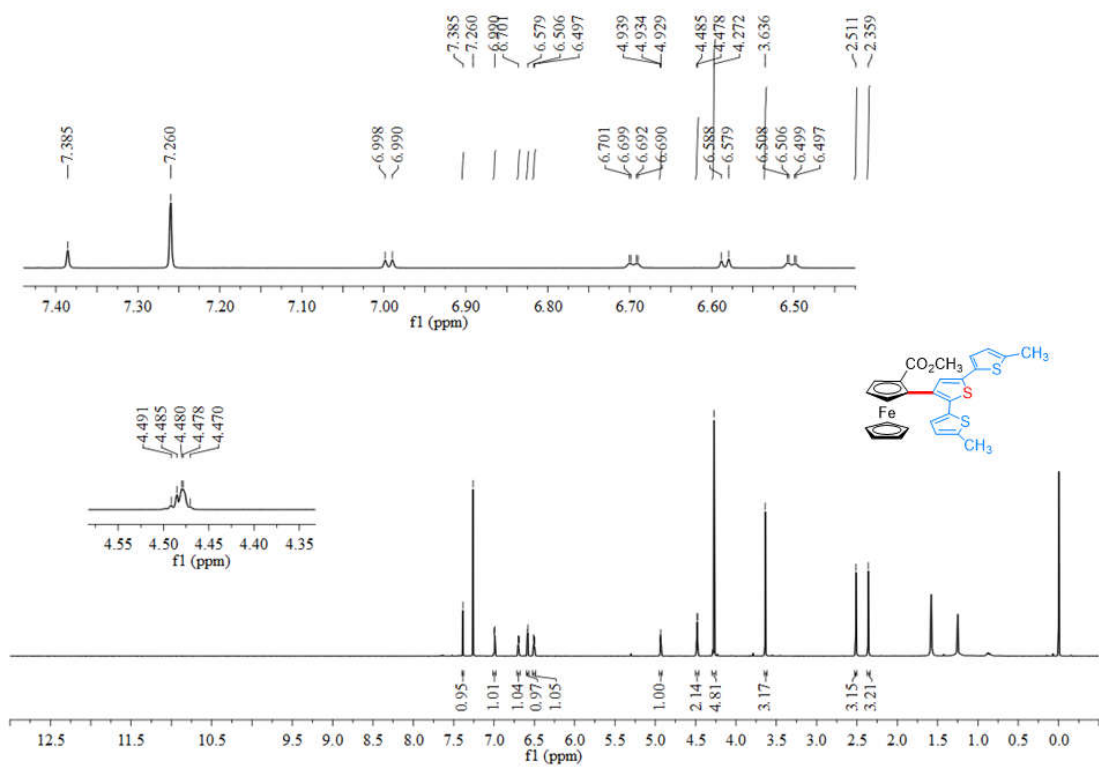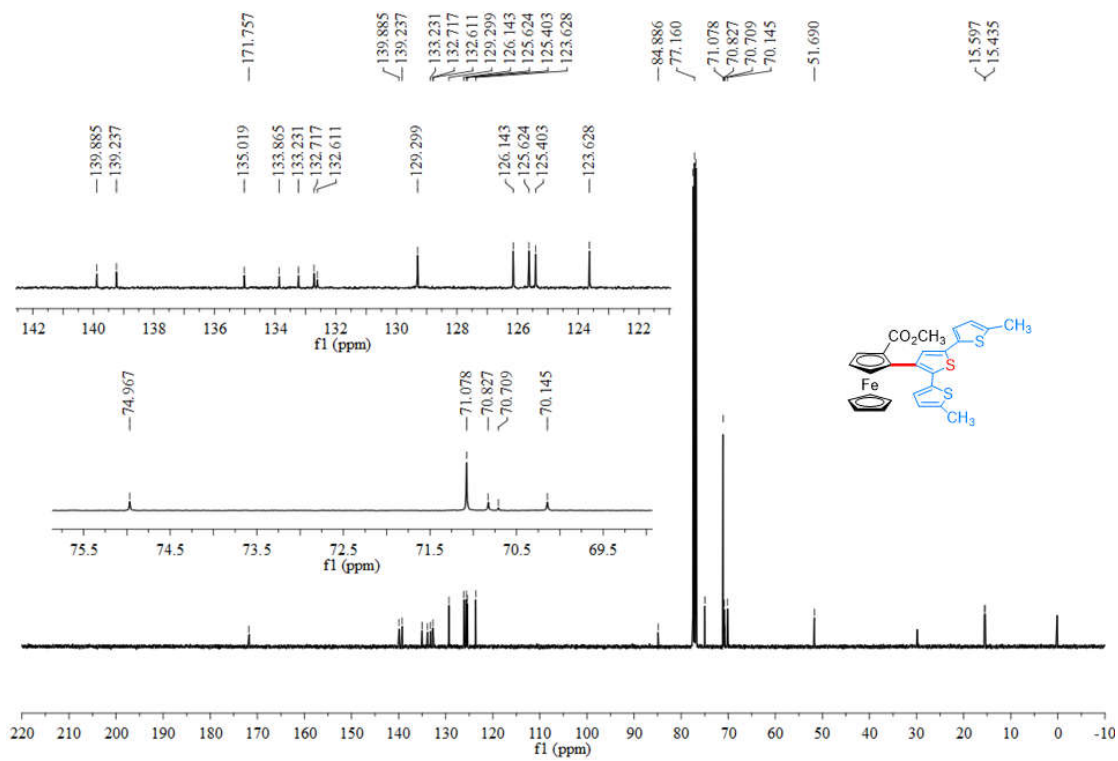

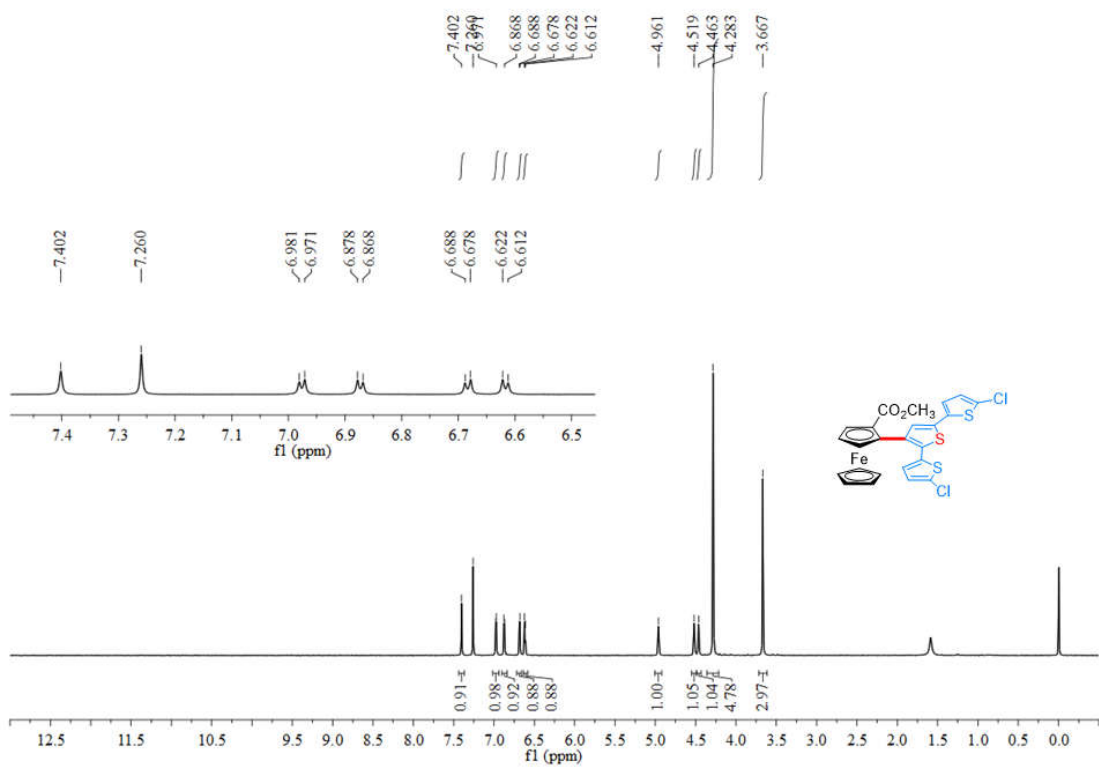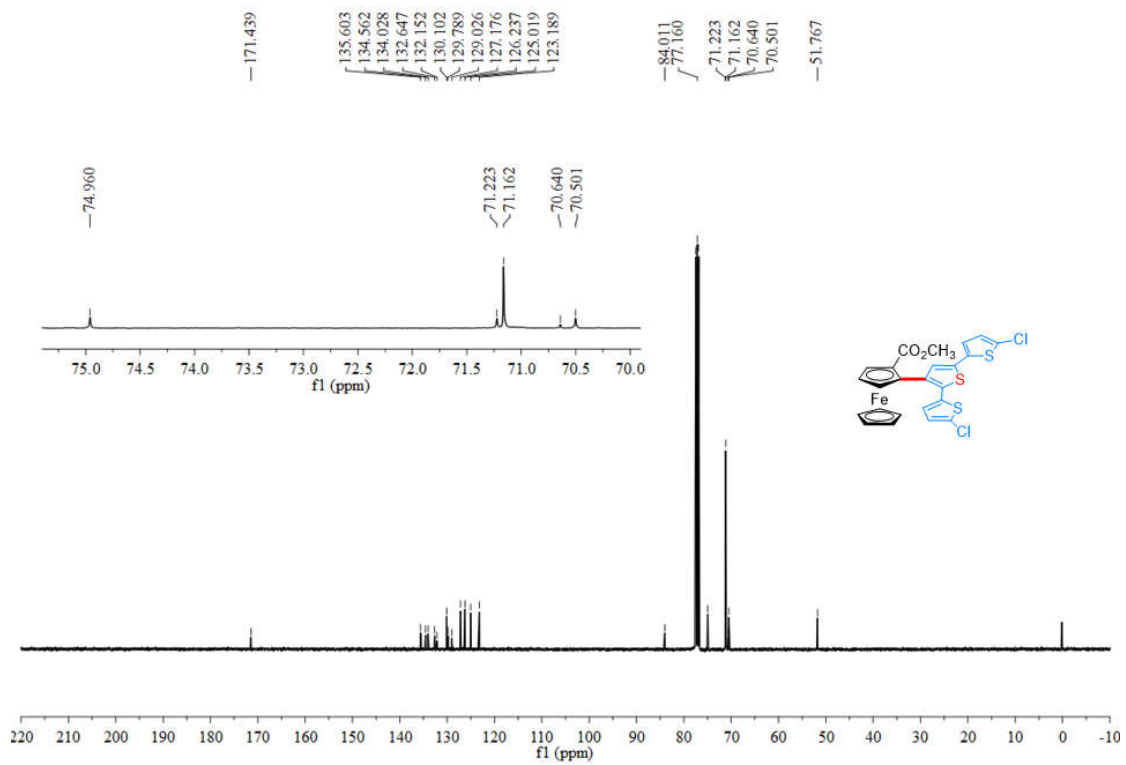

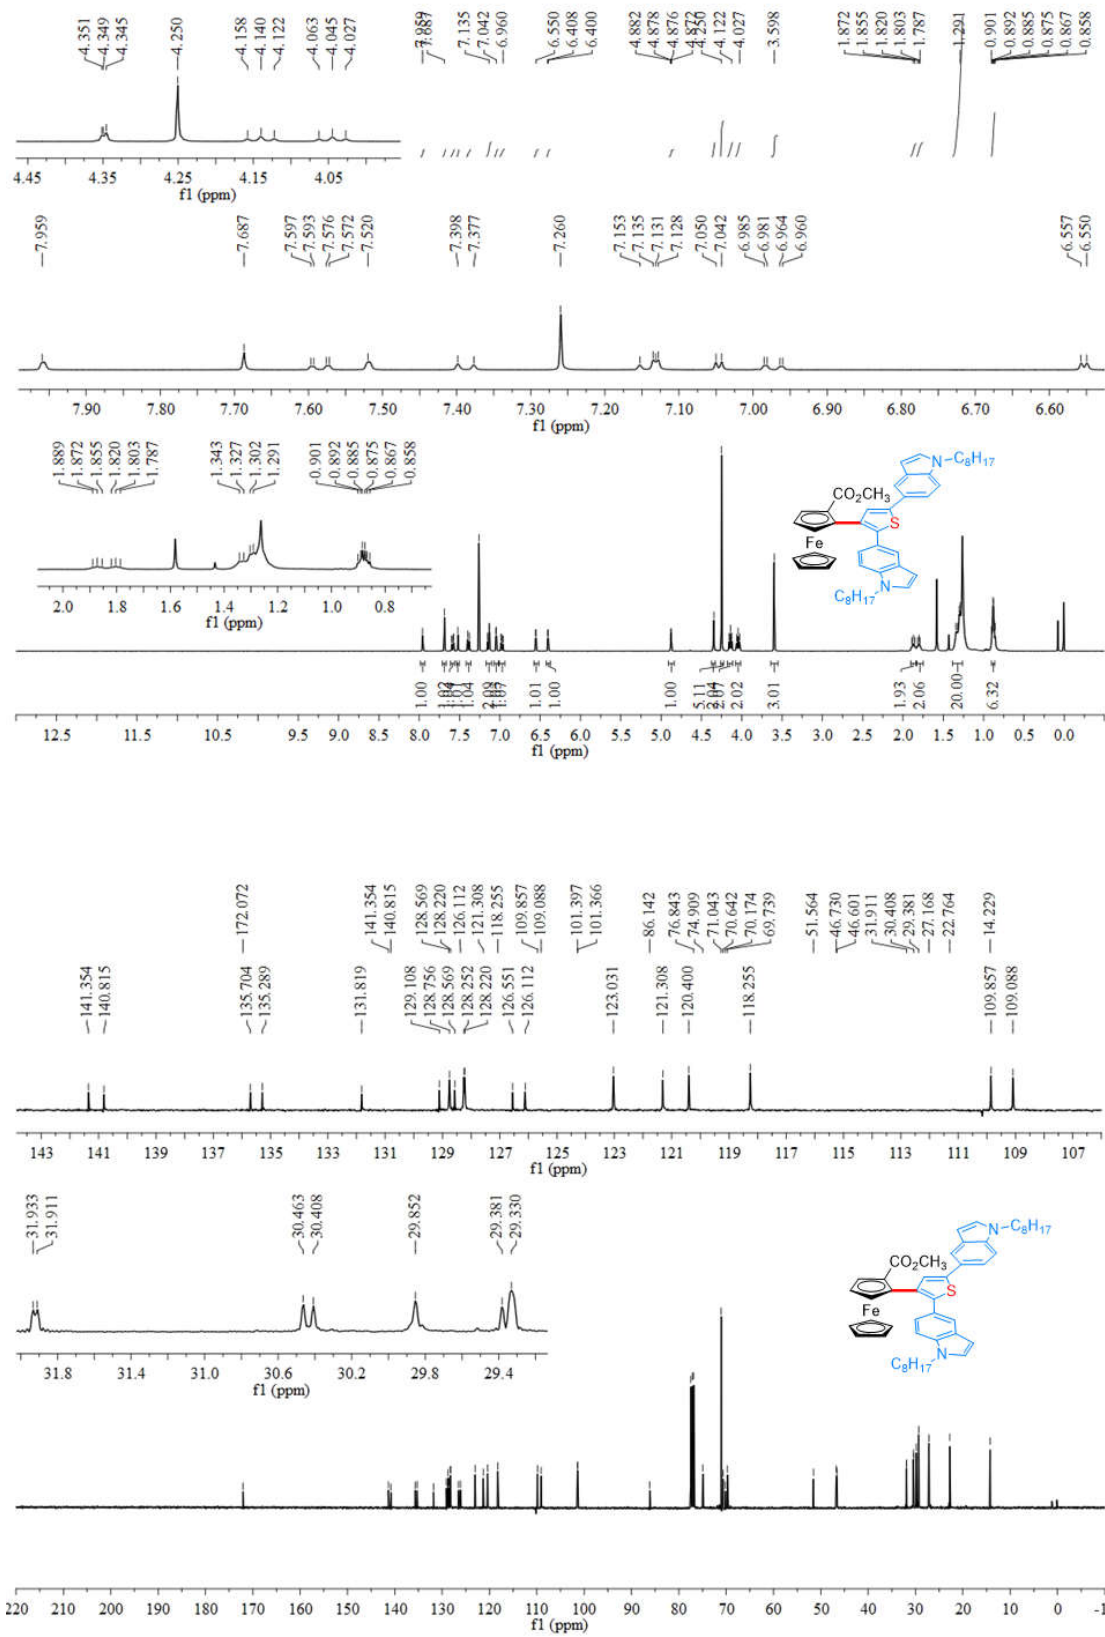

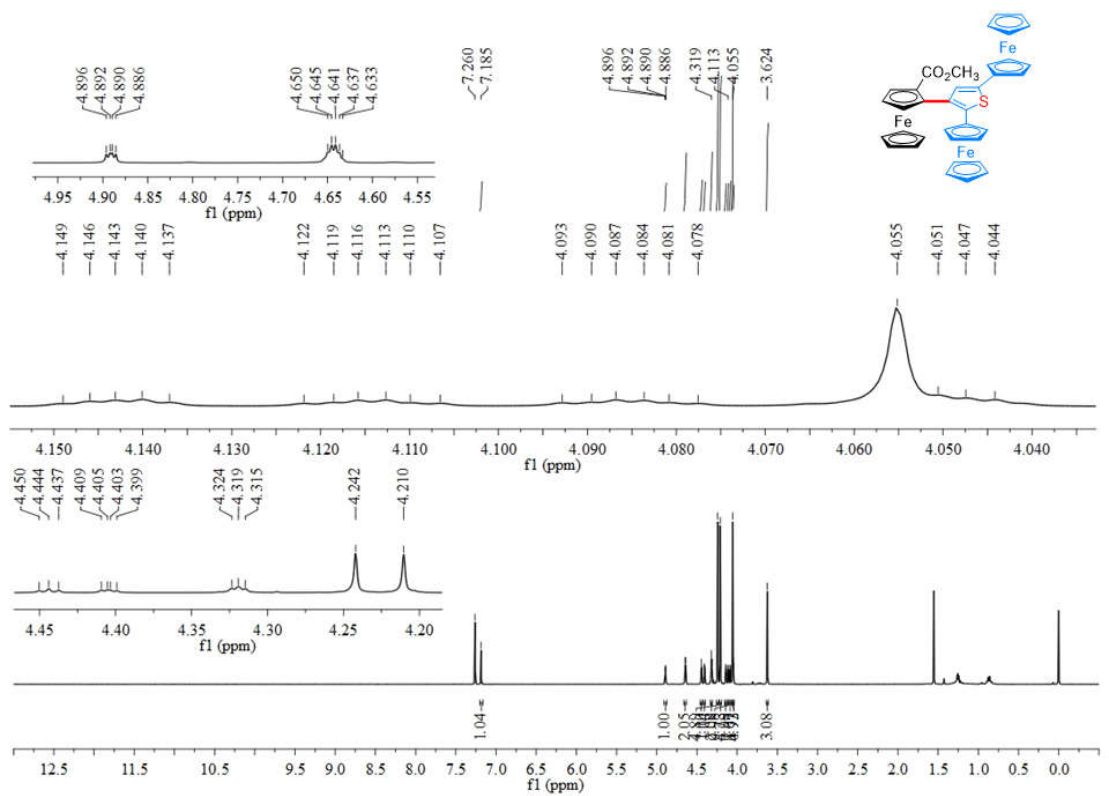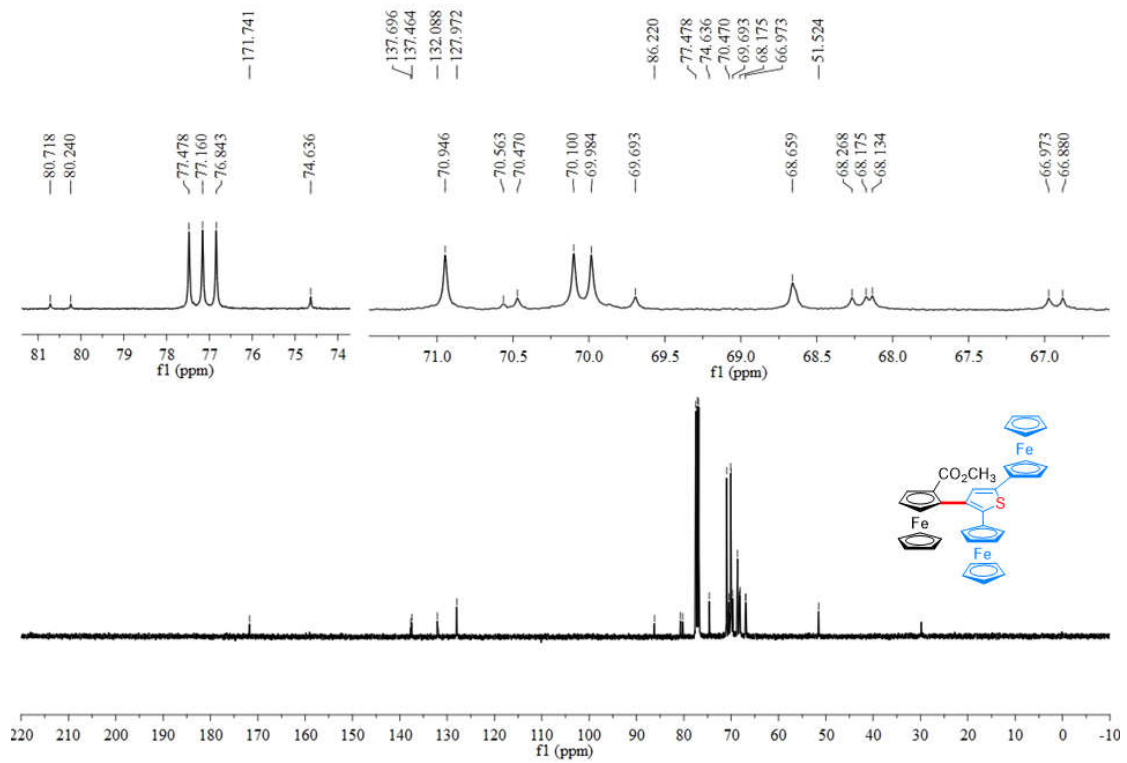



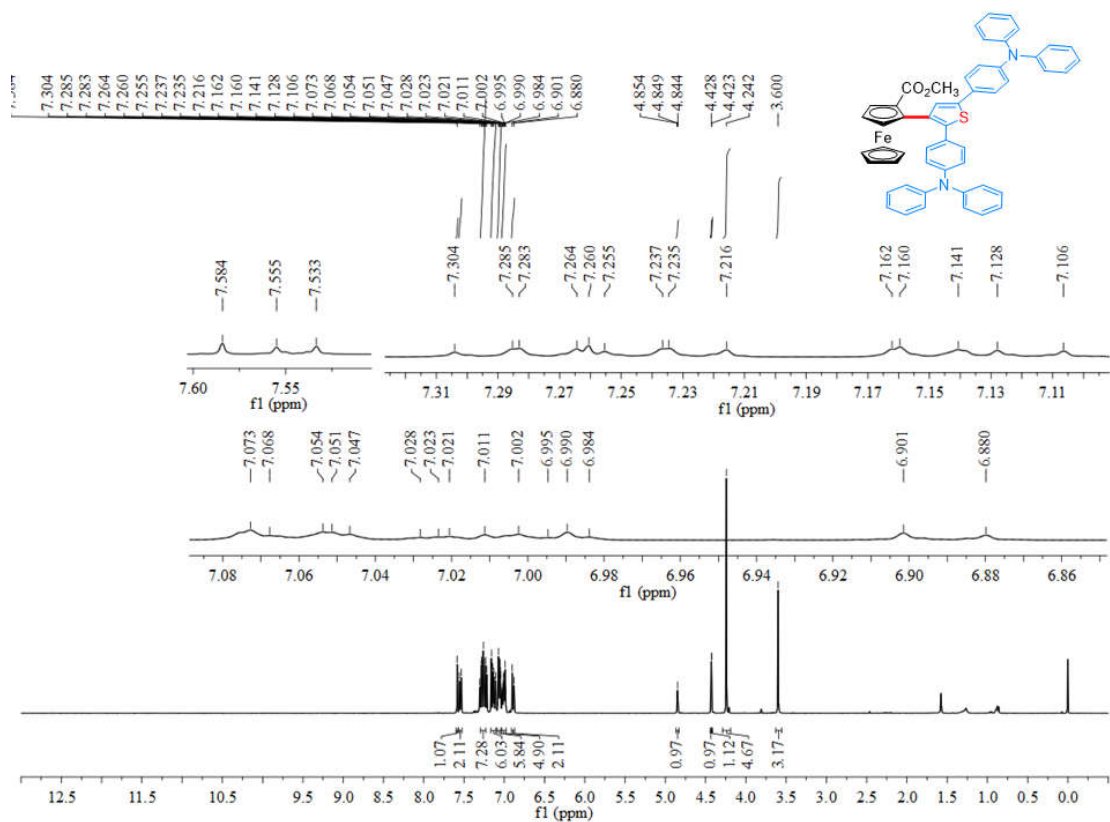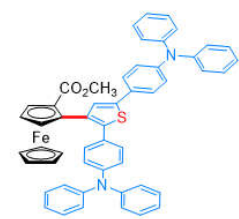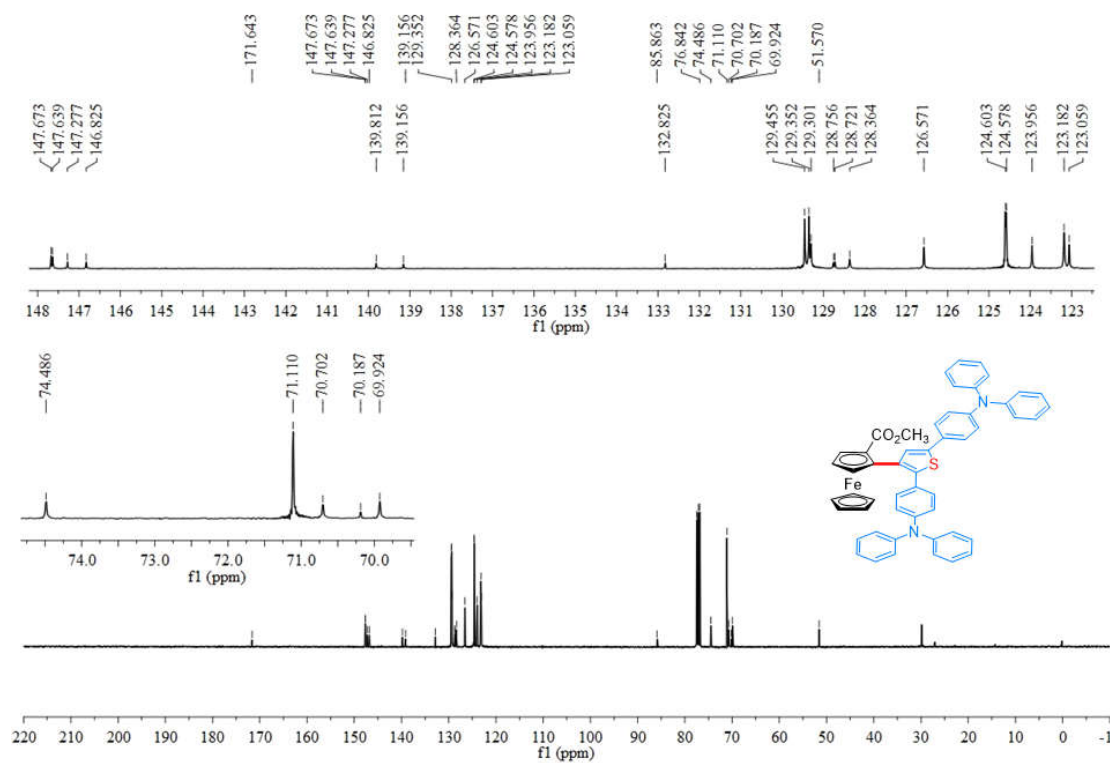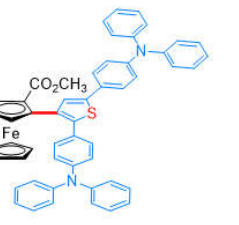

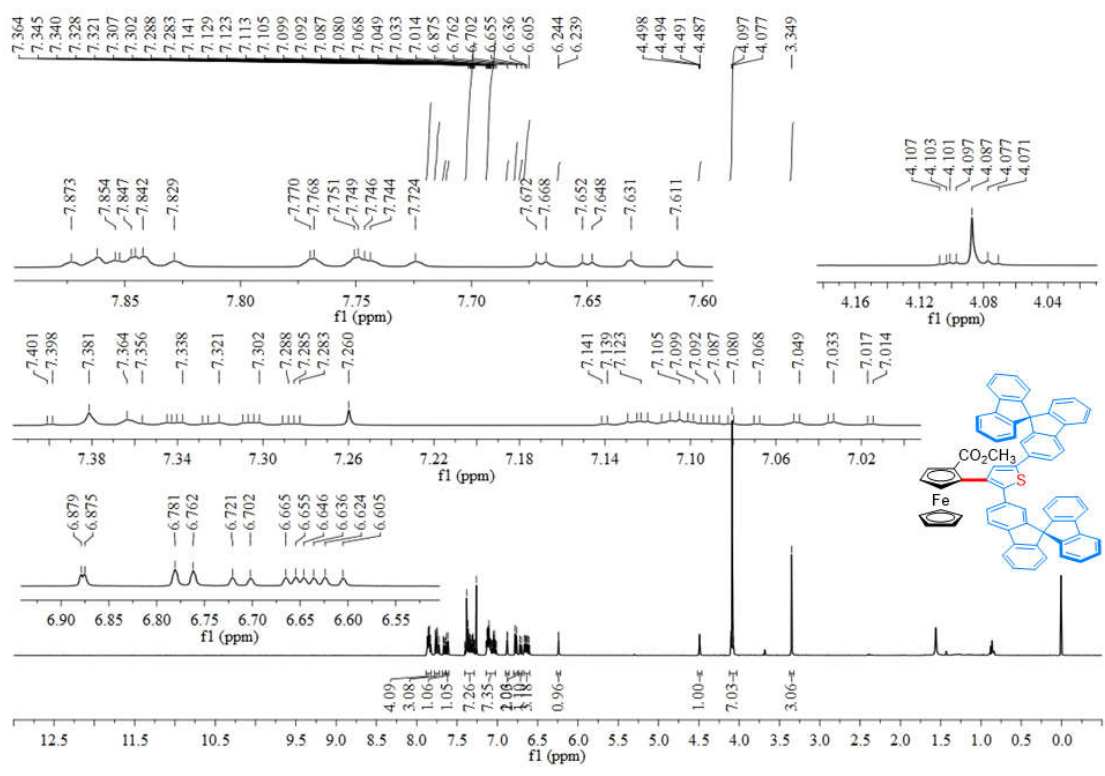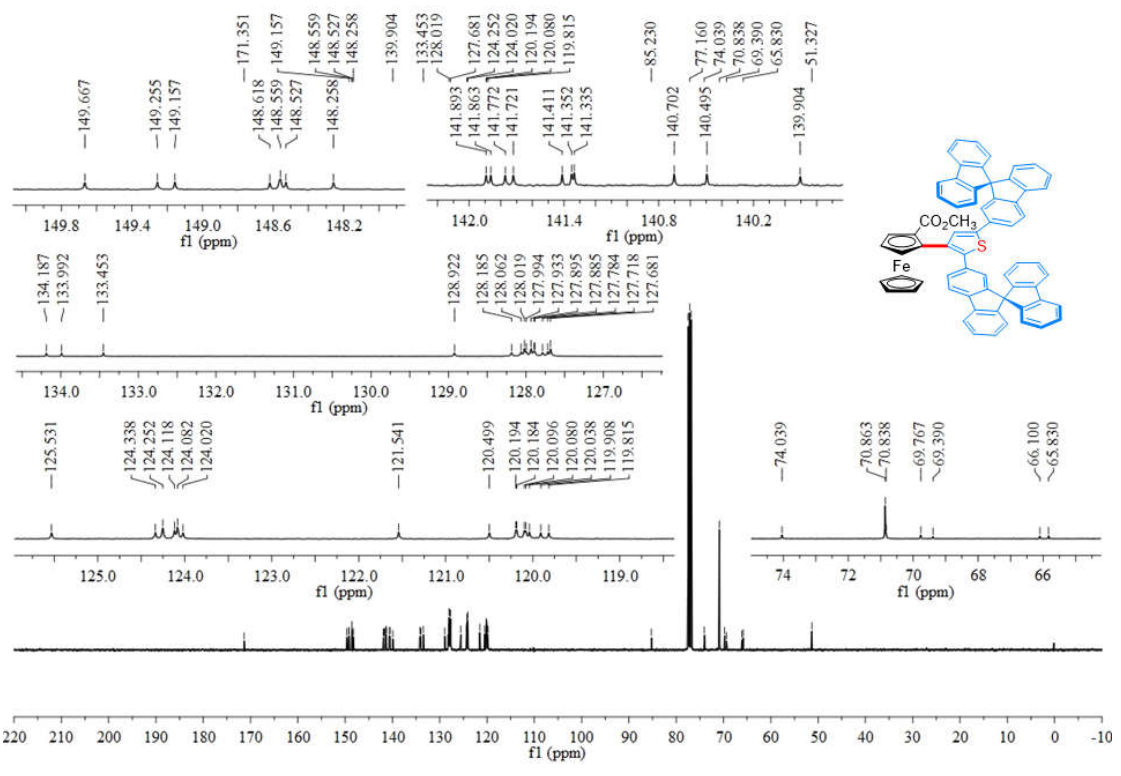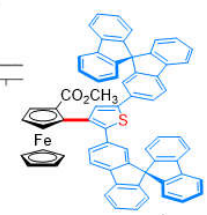

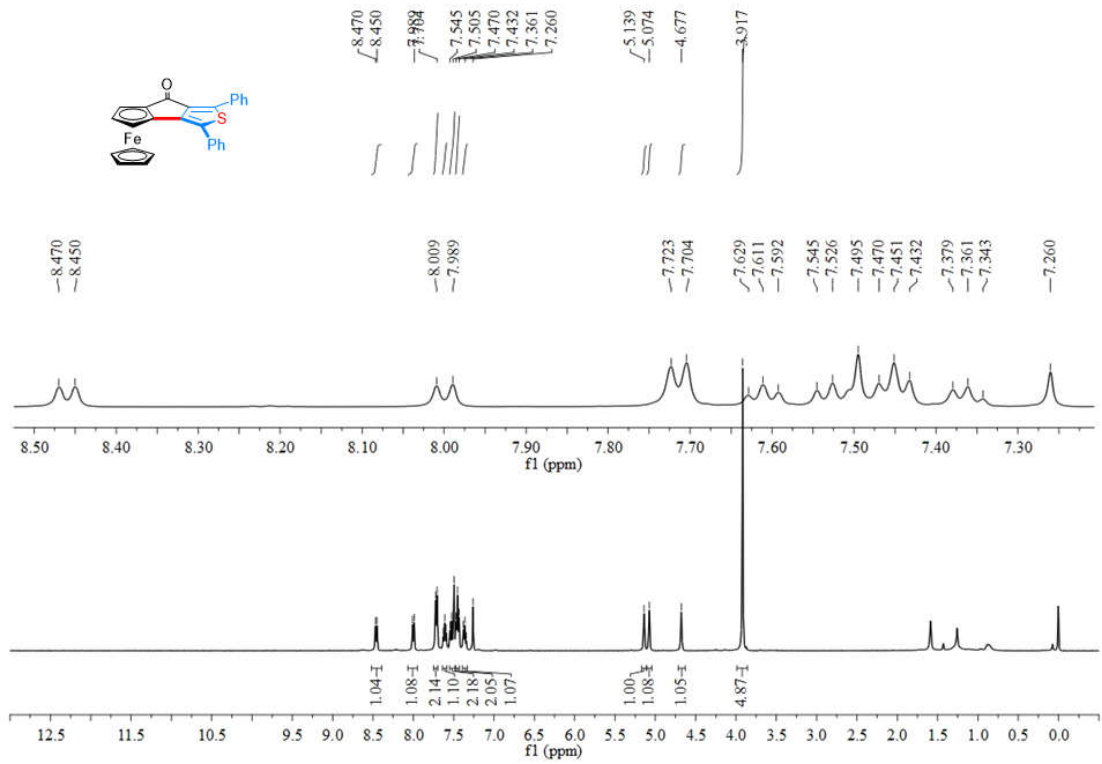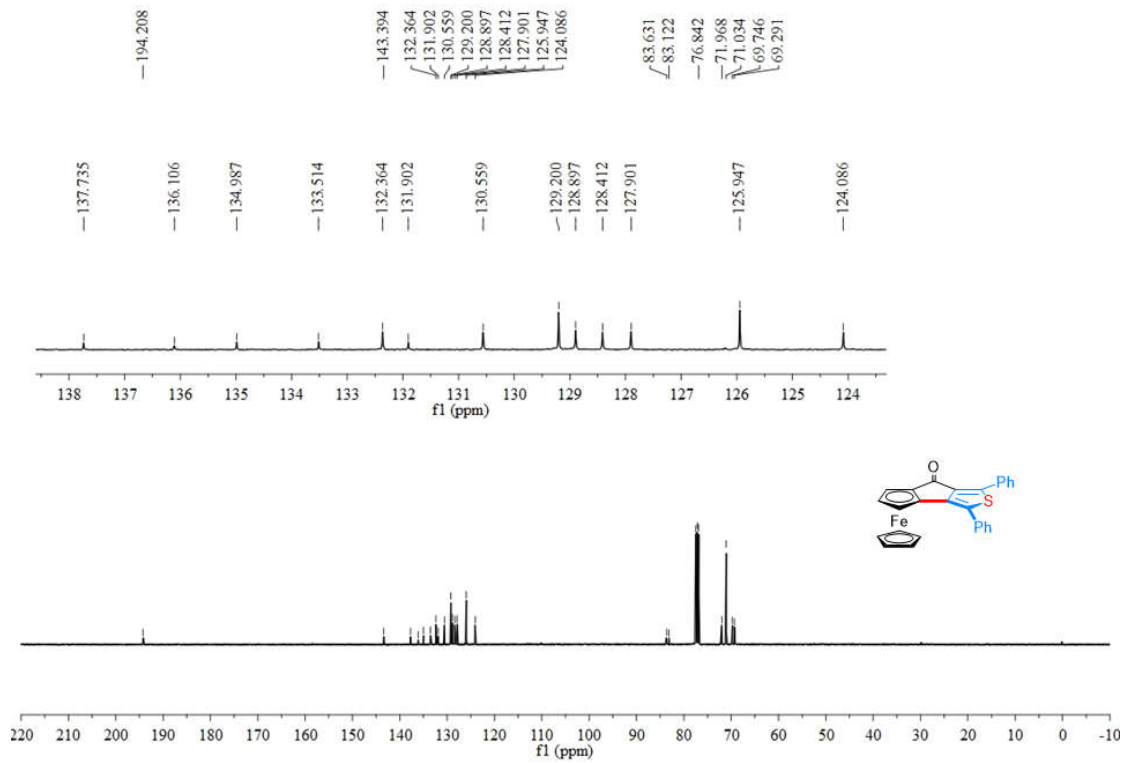

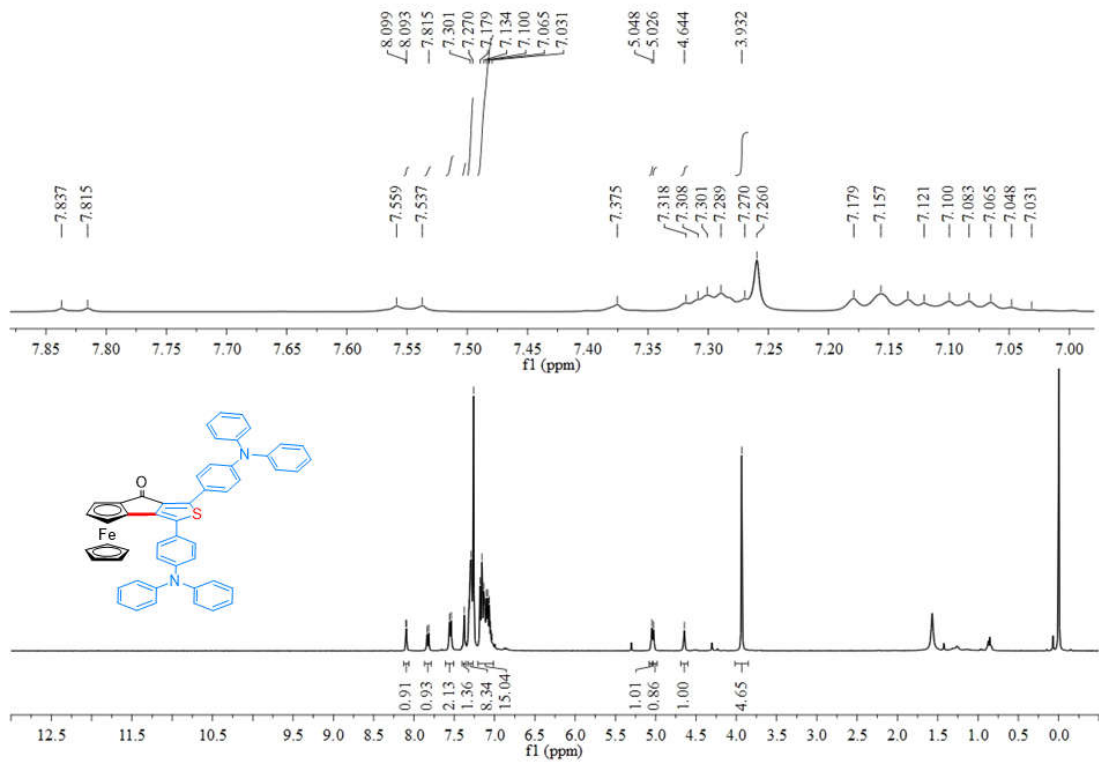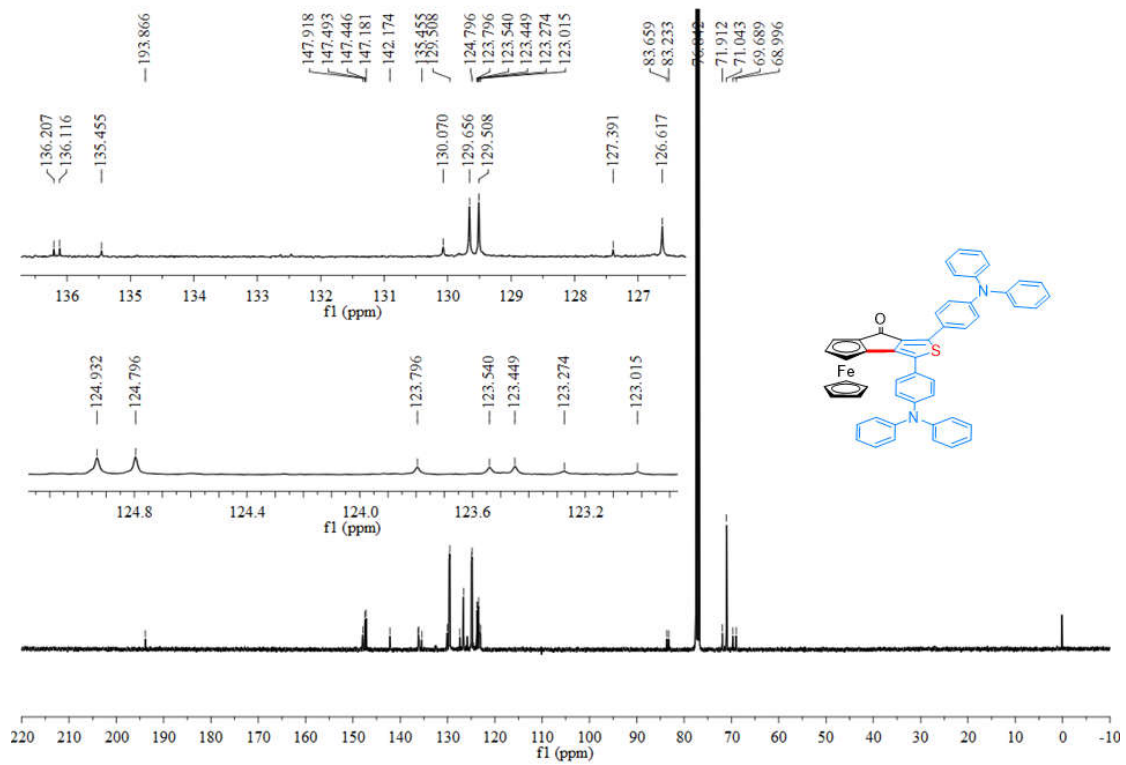

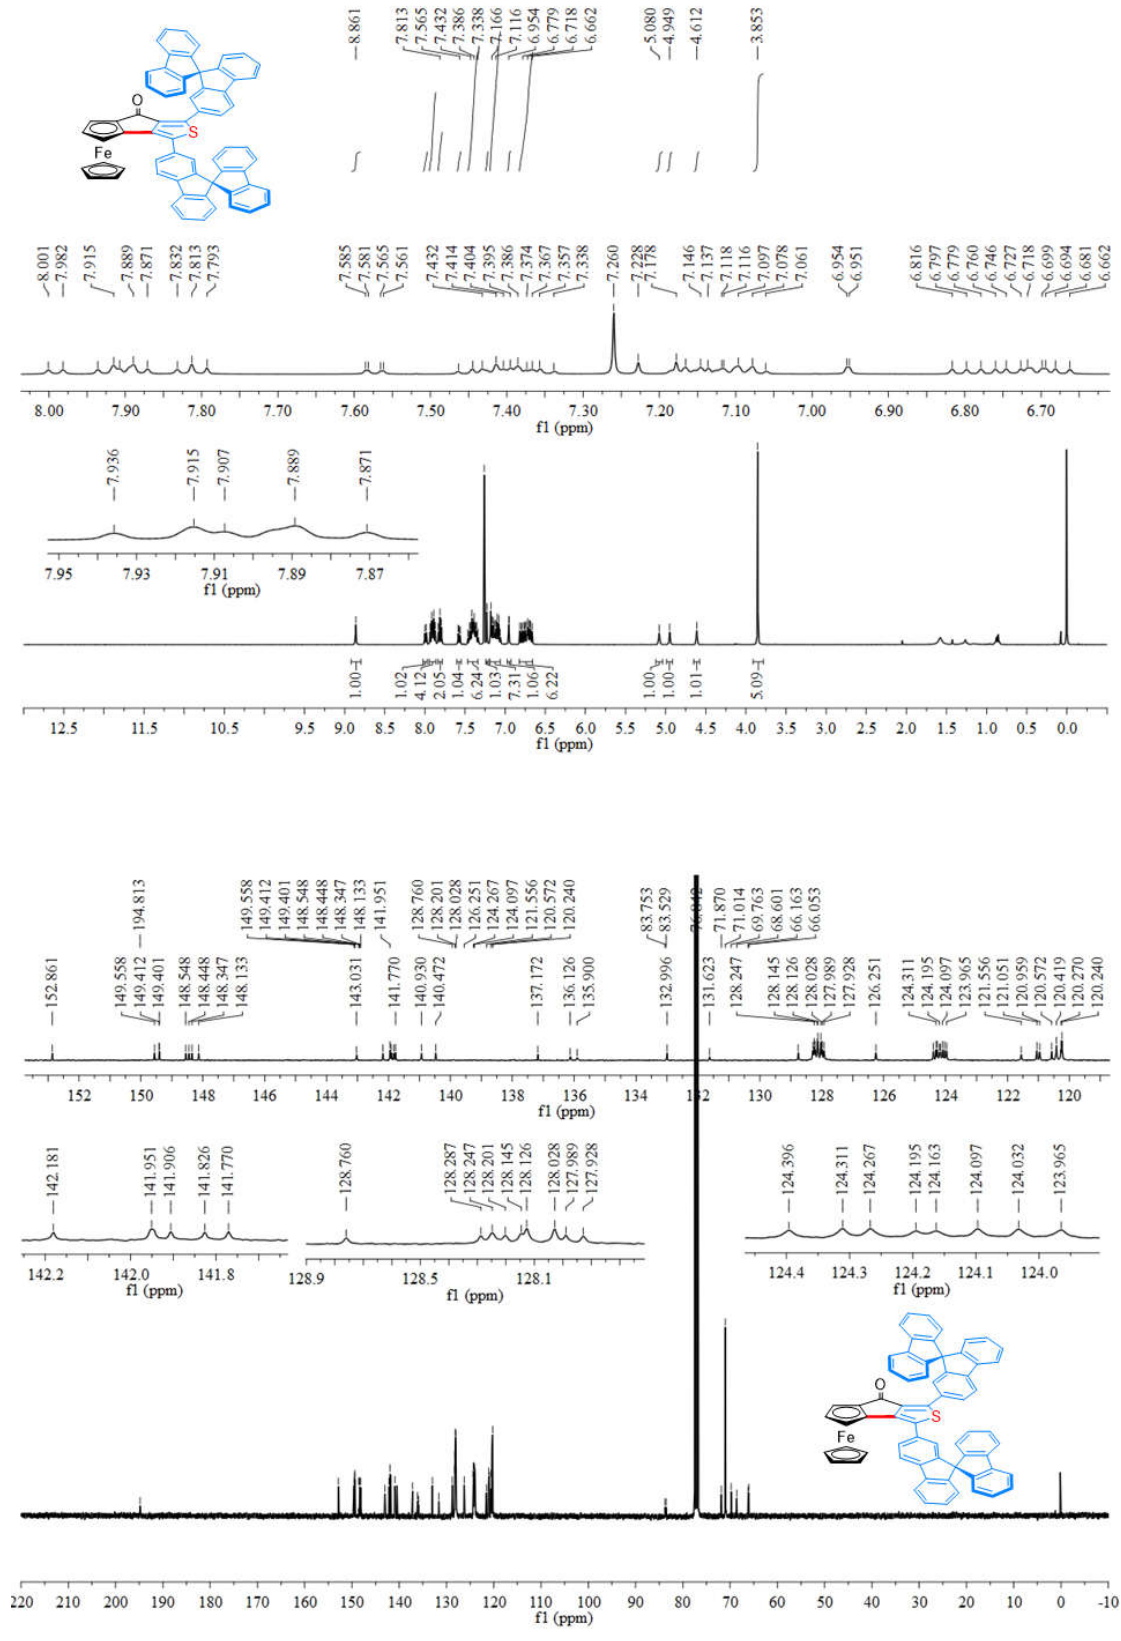

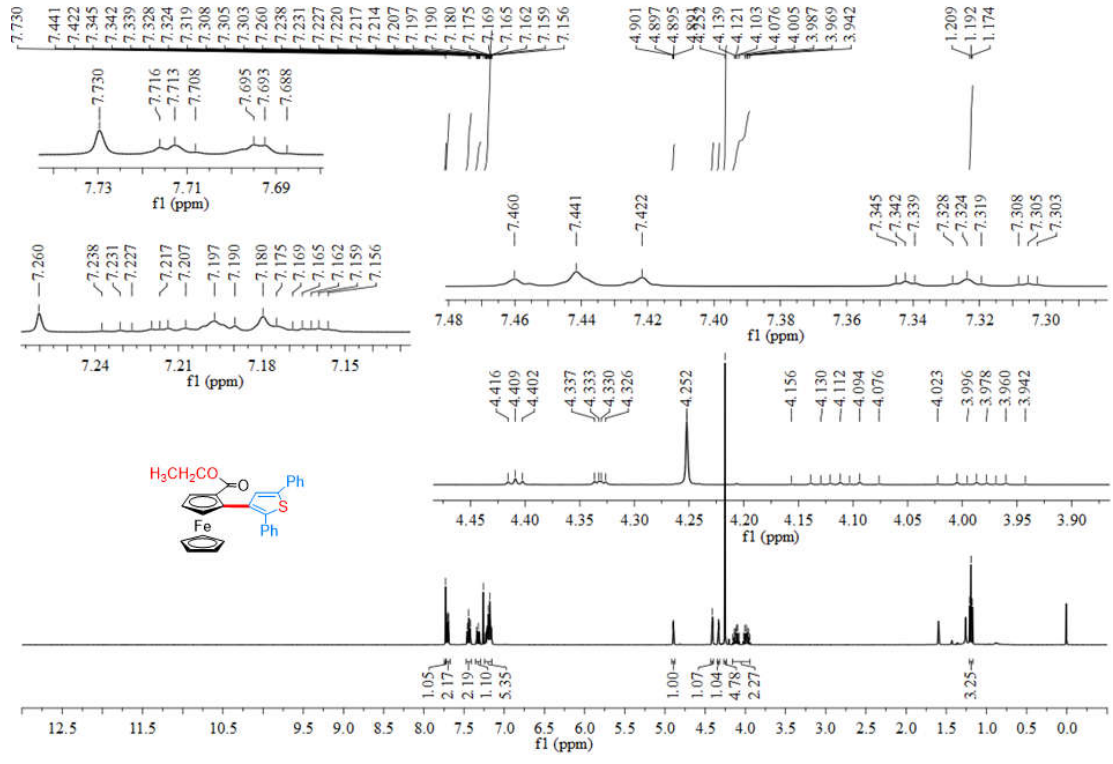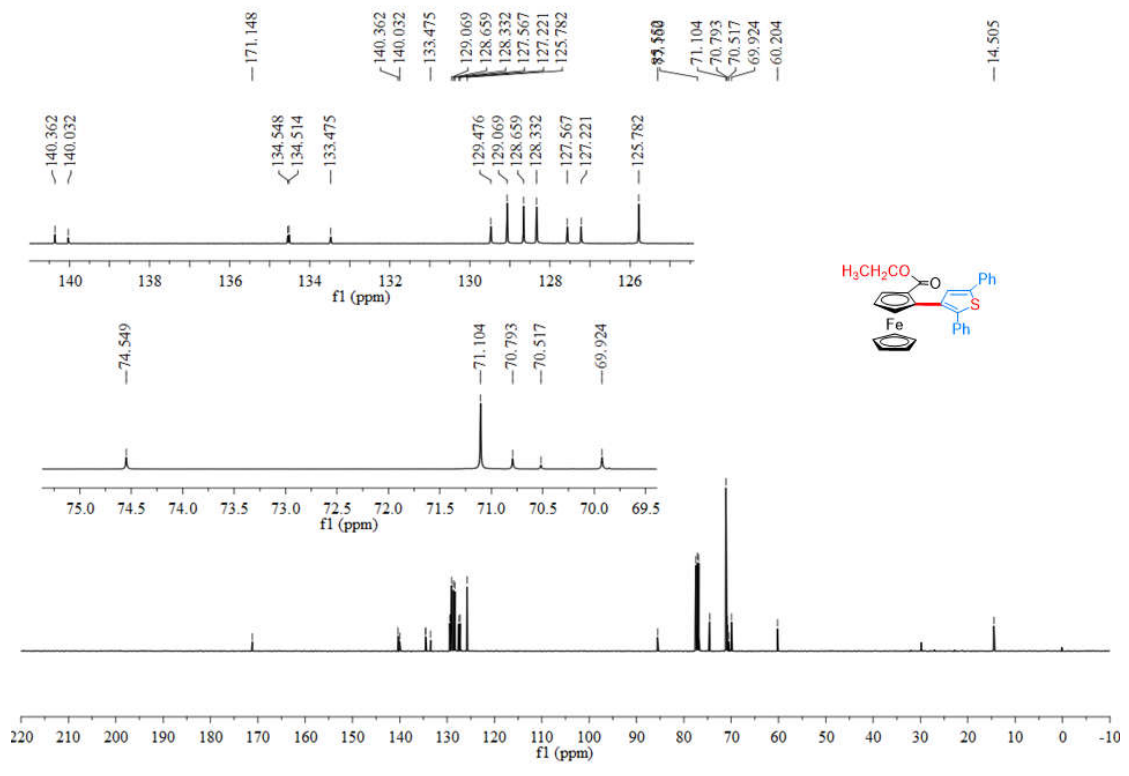

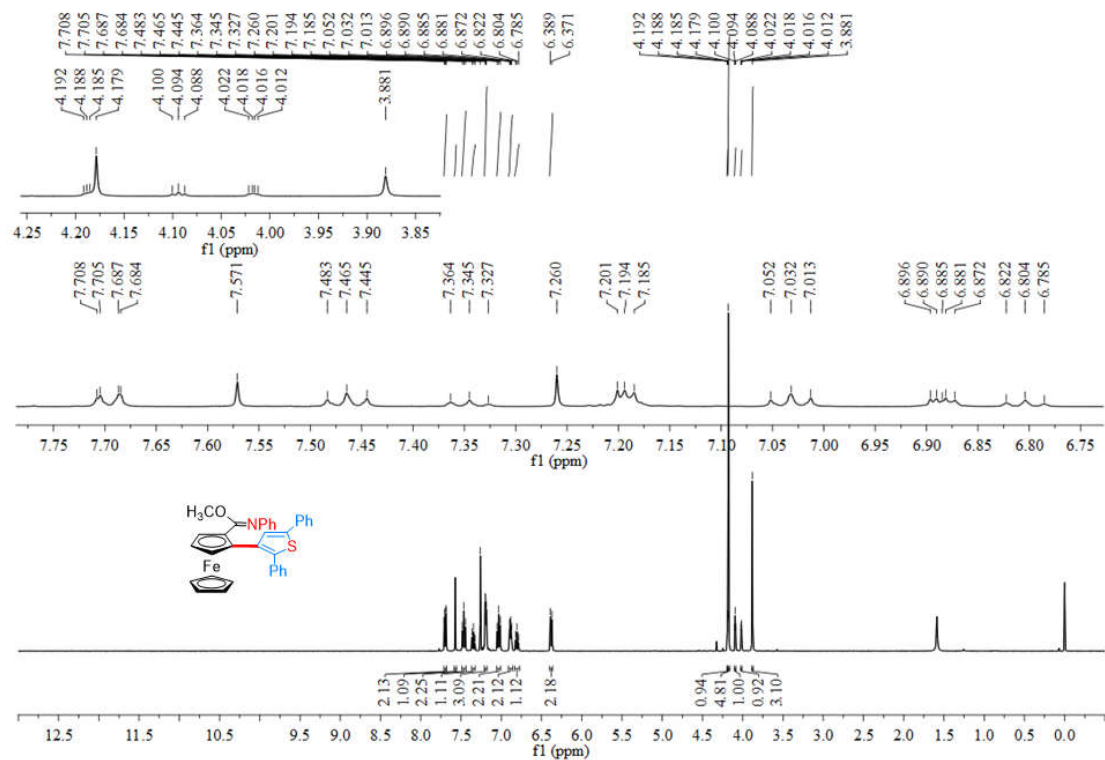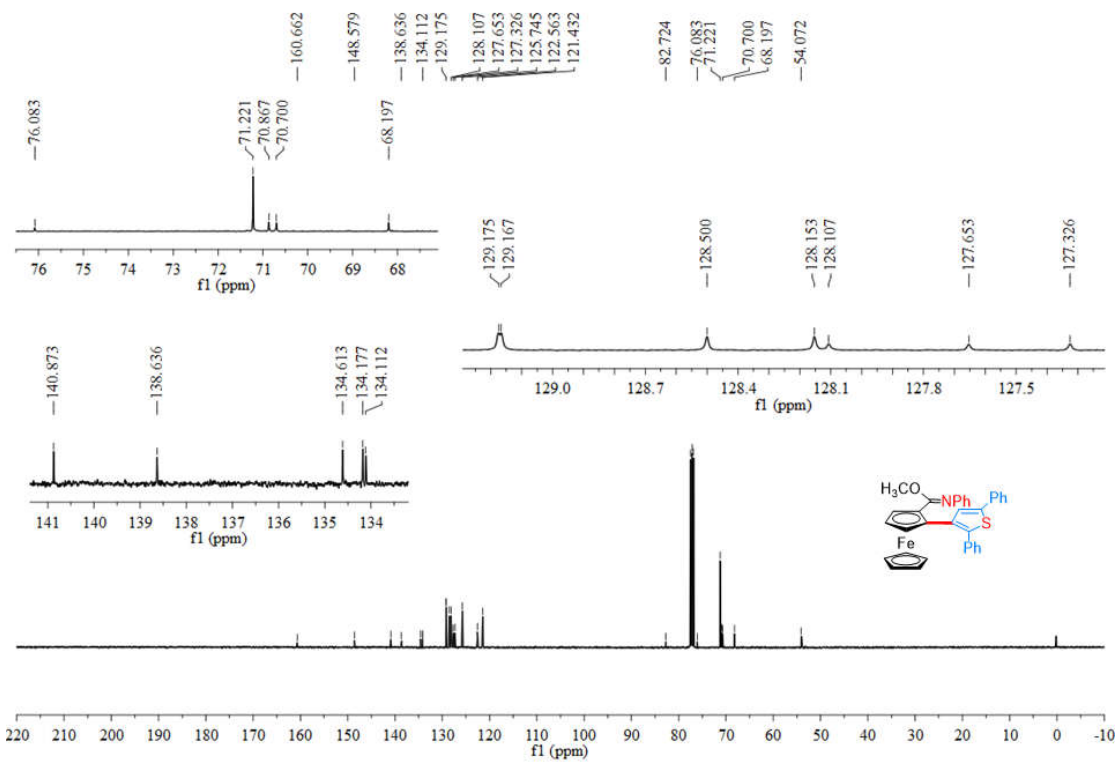

Supplement: d0sc04597g1.pdf [file d0sc04597g1.pdf]
